1  
2  
3  
4  
5  
6  
7  
8  
9  
10  
11  
12  
13  
14  
15  
16  
17  
18  
19  
20  
21  
22  
23  
24  
25  
26  
27  
28  
29  
30  
31  
32  
33  
34  
35  
36  
37  
38

The Ebola virus matrix protein clusters phosphatidylserine, a critical step in viral budding

Monica L. Husby<sup>1,2</sup>, Souad Amiar<sup>1,2¶</sup>, Laura I. Prugar<sup>3¶</sup>, Emily A. David<sup>1&</sup>, Caroline B. Plescia<sup>1&</sup>, Kathleen E. Huie<sup>3&</sup>, Jennifer M. Brannan<sup>3</sup>, John M. Dye<sup>3</sup>, Elsje Pienaar<sup>2,4</sup>, Robert V. Stahelin<sup>1,2\*</sup>

<sup>1</sup> Department of Medicinal Chemistry & Molecular Pharmacology, Purdue University, West Lafayette, Indiana, United States of America

<sup>2</sup> Purdue Institute of Inflammation, Immunology and Infectious Disease (PI4D), Purdue University, West Lafayette, Indiana, United States of America

<sup>3</sup> United States Army Medical Research Institute of Infectious Diseases USAMRIID, Fort Detrick, Frederick, Maryland, United States of America

<sup>4</sup> Weldon School of Biomedical Engineering, Purdue University, West Lafayette, Indiana, United States of America

\*Corresponding author

E-mail:rstaheli@purdue.edu (RVS)

¶ These authors contributed equally to this work

& These authors also contributed equally to this work

Running title: Targeting PS levels to inhibit EBOV

**Keywords:** Ebola virus, fendiline, filovirus, matrix protein, phosphatidylserine, plasma membrane, viral budding, VP40

1 **Abstract**

2           Phosphatidylserine (PS) has been shown to be a critical lipid factor in the assembly  
3 and spread of numerous lipid enveloped viruses. Here, we describe the ability of the Ebola  
4 virus (EBOV) matrix protein eVP40 to induce clustering of PS and promote viral budding  
5 *in vitro*, as well as the ability of an FDA approved drug, fendiline, to reduce PS clustering  
6 subsequently reducing virus budding and entry. To gain mechanistic insight into fendiline  
7 inhibition of EBOV replication, multiple *in vitro* assays were employed including imaging,  
8 viral budding and viral entry assays. Fendiline reduced the PS content in mammalian cells  
9 and PS in the plasma membrane, reducing the ability of VP40 to form new virus particles.  
10 Further, particles that do form from fendiline treated cells have altered particle  
11 morphology and decreased infectivity capacity. These complementary studies reveal the  
12 mechanism by which filovirus matrix proteins cluster PS to enhance viral assembly,  
13 budding, and spread from the host cell while also laying the groundwork for fundamental  
14 drug targeting strategies.

15

16

17

18

19

20

21

22

## 23 **Introduction**

24           Ebola virus (EBOV), which was first discovered in 1976[1,2], has been of much  
25 concern recently due to an ongoing outbreak in the Democratic Republic of Congo as well  
26 as the unprecedented 2014-16 outbreak in Western Africa. The FDA recently approved  
27 an EBOV vaccine that shows efficacy when administered prior to virus exposure[3];  
28 however, the duration and breadth of these recent outbreaks underscore that with an  
29 increasingly interconnected world, the dangers of reoccurring outbreaks are increasingly  
30 high and there is an imminent need to develop small molecule counter measures to treat  
31 patients who test positive for EBOV and exhibit symptoms. Further, there is still a large  
32 gap in knowledge in how EBOV hijacks host cell components to replicate and spread from  
33 cell-to-cell, elucidation of which may identify new drug targets.

34           In the Filoviridae family, EBOV and Marburg virus (MARV) are two of the most  
35 highly pathogenic viruses. EBOV and MARV are lipid enveloped negative-sense single  
36 stranded RNA viruses[4,5]. One commonly overlooked characteristic of many pathogenic  
37 viruses, including EBOV and MARV, is their lipid envelope, which is acquired from the  
38 host cell they infect. Furthermore, lipid enveloped negative-strand RNA viruses possess  
39 limited viral machinery, often encoding for just a handful of viral proteins. Amongst these  
40 viral proteins is the multi-functional matrix protein. These matrix proteins, including the  
41 VP40 protein of Ebola (eVP40) and Marburg (mVP40) viruses, are essential to efficient  
42 viral assembly and egress. In fact, independent expression of eVP40 or mVP40 leads to  
43 the production of virus-like particles (VLPs), nearly indistinguishable from infectious  
44 virions[6–8]. Although these matrix proteins travel through different trafficking pathways  
45 within cells, they coalesce at the plasma membrane (PM) to form the viral matrix, which

## Targeting PS levels to inhibit EBOV

46 directs viral assembly, budding and the acquisition of their characteristic lipid envelope[9–  
47 13]. Importantly, phosphatidylserine (PS) has been implicated in recruiting matrix proteins  
48 to the PM and coordinating the assembly of progeny virions[14–16].

49 While lipids play a critical role in assembly of progeny viral particles, lipids are also  
50 actively involved in viral entry in a phenomenon known as “apoptotic mimicry”. Apoptotic  
51 mimicry is central to the efficient entry of numerous lipid-enveloped viruses[17–19].  
52 During apoptotic mimicry, PS is transferred from the inner to the outer leaflet of the PM;  
53 this causes PS to become a component of the outer viral envelope during  
54 infection[14,20,21]. Subsequently, the exposed PS in the viral envelope is recognized by  
55 target cell receptors for viral uptake, continuing the viral lifecycle[18,22,23].

56 The two bilayers of the PM have varying compositions of four main phospholipid  
57 classes asymmetrically distributed across the two bilayers[24,25]. However, the most  
58 abundant anionic lipid within the inner leaflet of the PM is PS, a frequent participant in  
59 peripheral protein recruitment[26]. Extensive work has looked at the dynamic nature of  
60 lipids within the PM, including PS, and their tendency to cluster into domains several  
61 hundred nanometers in size[15,27,28]. Clustering of anionic lipids into domains enriches  
62 regions of the PM with anionic charge, creating a platform for electrostatic interactions at  
63 the PM and cytosolic interface for peripheral protein recruitment. This phenomenon has  
64 been reported between PS and the matrix protein of influenza A virus[15]. Although  
65 significant work has underscored the importance of PS in filovirus budding and  
66 entry[14,18,22,29–32], the molecular details of the interaction has not been explored in  
67 the context of the lateral organization of PS, matrix assembly or implications on viral  
68 spread.

## Targeting PS levels to inhibit EBOV

69           Recently, an FDA approved drug, fendiline, was reported to reduce PS levels  
70 within the PM inner leaflet[33,34], which was sufficient to inhibit the oncogenic protein K-  
71 Ras PM localization and signaling[34,35]. Fendiline was initially approved by the FDA in  
72 the 1970s as a non-selective calcium channel blocker to treat coronary heart disease[36];  
73 however, these recently identified off target properties were found to be calcium  
74 independent and associated with the indirect inhibition of acid sphingomyelinase  
75 (ASM)[33,34]. eVP40 and mVP40 have been shown to utilize PS for their PM localization,  
76 assembly, and production of progeny virions; however, detailed molecular insight into this  
77 relationship is lacking. To delineate the molecular architecture and requirements of PS  
78 concentration on VP40 assembly, oligomerization and budding, we employed  
79 biochemical and biophysical assays *in vitro* and in cells. We also tested the ability and  
80 mechanism by which VP40 clusters PS *in vitro* and in cells. We hypothesized that  
81 reduction of PS from the PM with fendiline treatment would perturb filovirus assembly and  
82 inhibit viral budding. Lastly, fendiline treatment was tested as a potential therapy for  
83 inhibition of EBOV budding and spread in biosafety level (BSL)-2 and BSL-4 models of  
84 infection. Our results demonstrate that VP40 clusters PS, a critical requirement for viral  
85 budding, spread and subsequent entry that can be inhibited with the FDA-approved drug  
86 fendiline.

87

## 88 **Results**

89 **EBOV VP40 localizes to PS enriched regions in synthetic membranes and in living**  
90 **cells**

## Targeting PS levels to inhibit EBOV

91 Previous work investigating the relationship between PS and eVP40 has been  
92 limited to the transient expression of the PS probe, GFP-LactC2, and PS-deficient cell  
93 lines[14,29]. The drawback to these techniques is the inability to capture PS and eVP40  
94 localization simultaneously, as GFP-LactC2 and GFP-eVP40 compete for PS binding  
95 within the PM. To overcome this limitation, we utilized a synthetic fluorescent analogue  
96 of PS, TopFluor® TMR-PS (tetramethylrhodmaine-PS (TMR-PS)) which permits  
97 visualization of PS and eVP40 localization and dynamics in real time in synthetic  
98 membranes and in cells.

99 It was previously reported that eVP40 has selectivity and high affinity for PS and  
100 PI(4,5)P<sub>2</sub>, both *in vitro* and in cells[14,31,37–40]. To test if eVP40 colocalizes with PS, we  
101 employed a TMR-PS labelled giant unilamellar vesicle (GUV) system with fluorescently  
102 labelled His<sub>6</sub>-eVP40. Because of their large size, GUVs are a reliable tool for fluorescence  
103 analysis of lipid-protein interactions by confocal microscopy. To simultaneously image  
104 eVP40 and PS localization, we generated an Alexa-488 conjugated His<sub>6</sub>-eVP40 dimer  
105 (eVP40-Alexa488) through conjugation of the fluorophore to two cysteine residues within  
106 the dimer structure (positions 311 and 314) using a previously described protocol[41].  
107 First, we tested the ability of conjugated eVP40 to bind control and anionic membranes  
108 by incubating different GUVs with eVP40-Alexa488. Confocal microscopy was performed  
109 and fluorescence plot profile analysis of both eVP40-Alexa488 and TMR-PS was  
110 analyzed (Expanded View Fig. 1a-d). As expected, no significant overlap of fluorescence  
111 signals was observed following incubation of eVP40-Alexa488 with control GUVs  
112 (DPPC:Chol) (Expanded View Fig. 1a *left panel* & Expanded View Fig 1b). Furthermore,  
113 the quantification of protein enrichment showed no eVP40 enrichment on this control

## Targeting PS levels to inhibit EBOV

114 membrane despite the presence of 0.2 % anionic fluorescent PS (enrichment index  $1.0 \pm$   
115  $0.2$ , Expanded View Fig. 1e). This result clearly supports previous data demonstrating  
116 that eVP40 membrane binding is anionic lipid dose-dependent[14,31,39] requiring a level  
117 of PS similar to that found at the PM inner leaflet.

118 In GUVs supplemented with DPPS, we observed a homogeneous ring structure of  
119 eVP40-Alexa488 surrounding the GUV membrane (Expanded View Fig. 1a, *middle panel*)  
120 and the plot profile analysis indicates a small overlap of the two fluorescent signals at the  
121 GUV membrane (Expanded View Fig. 1c, indicated by the asterisk). However, the protein  
122 enrichment at the GUV membrane does not indicate a significant increase in the amount  
123 of Alexa488 fluorescence at the GUV membrane (enrichment index  $1.4 \pm 0.4$ , Expanded  
124 View Fig. 1e). These data indicate that the conjugated protein binds weakly to DPPS-  
125 containing GUVs. To investigate further the ability of eVP40-Alexa488 to bind an anionic  
126 membrane similar to the PM, similar analyses as above were performed on GUVs  
127 containing both DPPS and PI(4,5)P<sub>2</sub> (Expanded View Fig. 1a *right panel*). The plot profile  
128 analysis of the image in Supplementary Fig. 1a revealed a strong overlap between the  
129 two fluorescence signals (eVP40 and TMR-PS) (Expanded View Fig. 1d). The protein  
130 enrichment analysis also supported this previous observation with an enrichment index  
131 of  $\sim 5.4 \pm 2$ , four times more than membranes devoid of PI(4,5)P<sub>2</sub> (Expanded View Fig.  
132 1e). These data are in agreement with the previously published findings that eVP40  
133 requires both anionic lipids for efficient membrane binding and oligomerization and  
134 suggest eVP40 is able to enrich fluorescent PS at sites of VP40 oligomerization.

135 To expand upon our findings, we investigated if eVP40 localizes to PS enriched  
136 regions within living cells. PS can be exogenously added to media of cells and within

## Targeting PS levels to inhibit EBOV

137 minutes it will be incorporated into the inner leaflet of the PM as a result of PS flippases,  
138 which are widely expressed in mammalian cells and rapidly translocate PS from the outer  
139 to the inner leaflet of the PM[42]. To visualize PS and protein localization simultaneously,  
140 we transiently expressed EGFP-fused proteins in HEK293 cells and supplemented the  
141 cells with TMR-PS immediately prior to imaging (Expanded View Fig. 2a). Plot profile  
142 analysis of the fluorescence intensities for both EGFP and TMR-PS was performed  
143 (Expanded View Fig. 2b-f). To first verify our experimental setup, monomeric EGFP or  
144 EGFP-LactC2 were expressed in HEK293 cells. Plot profile analysis comparing the EGFP  
145 vs. TMR-PS signals revealed almost no overlap of the fluorophores, as EGFP was  
146 primarily cytosolic (Expanded View Fig. 2a,b). Additionally, the plot profile analysis of the  
147 EGFP-LactC2 vs. TMR-PS signals showed strong overlap of these two fluorophores  
148 (Expanded View Fig. 2a,c). These results confirmed that TMR-PS was specifically  
149 localized to the PM and was detectable by a peripheral protein with PS specificity.

150 To test the hypothesis that eVP40 localizes to PS enriched regions of the PM, we  
151 next examined the plot profile analysis of TMR-PS and eVP40 by expressing functionally  
152 unique EGFP fused eVP40 proteins: WT-eVP40, K224A-eVP40 (a PS-binding residue  
153 mutant[31]), and WE/A-eVP40 (oligomerization deficient mutant[43]). The fluorescence  
154 profile of EGFP-WT-eVP40 vs. TMR-PS revealed a strong overlap between the two  
155 fluorophores (Expanded View Fig. 2a,d). This cellular data corroborates our *in vitro* data,  
156 demonstrating that EGFP-eVP40 localizes to PS enriched regions of both model  
157 membranes and in the PM of cells. Additionally, there was no significant fluorescence  
158 signal overlap between the EGFP-K224A-eVP40 mutant and TMR-PS (Expanded View  
159 Fig. 2a,e) which supports the requirement for PS binding for PM localization of eVP40[31].



160 Importantly, plot profile analysis revealed a moderate overlap in the fluorescence signals  
161 of the oligomerization deficient mutant WE/A-eVP40 and TMR-PS (Expanded View Fig.  
162 2a,f). This is important to note as this protein is still able to interact with PS at the PM,  
163 however, is unable to properly oligomerize[43,44]. These results suggest that VP40  
164 interacts with PS at the PM inner leaflet as a dimer without significant oligomerization, in  
165 line with VP40 *in vitro* lipid-binding[31].

166

### 167 **EBOV-VP40 enhances clustering of PS in synthetic membranes and in living cells**

168 The proper localization and function of numerous peripheral proteins are  
169 dependent on the presence of PS in the inner leaflet[45–47]. Biophysical and molecular  
170 studies into PS dynamics in both model membranes and in living cells revealed that PS  
171 basally distributes into clustered domains enriched with PS[15,27,28]. Interestingly,  
172 cellular proteins such as Annexins are known to significantly enhance the clustering of  
173 PS[48] and viral proteins such as M1 of Influenza A virus have a selectivity for these PS  
174 clusters[15]. However, detailed examination of PS clustering and whether filovirus matrix  
175 proteins such as eVP40 alter the organization of PS has not yet been explored.

176 To quantitatively investigate how eVP40 affects PS clustering *in vitro*, we  
177 investigated TMR-PS labelled PS:PI(4,5)P<sub>2</sub> GUVs incubated with eVP40-Alexa488 using  
178 confocal microscopy. Confocal 3D reconstruction of GUVs (with DPPS and PI(4,5)P<sub>2</sub>) in  
179 the absence of protein indicates a homogeneous distribution of TMR-PS across the  
180 section of the GUV membrane (Fig. 1a; *left column*). However, after incubation with 1.25  
181  $\mu$ M of eVP40:eVP40-Alexa488 (9:1 ratio), different structures of TMR-PS clusters are  
182 clearly observed where eVP40-Alexa488 fluorescence is enriched (Fig. 1a, *three right*

## Targeting PS levels to inhibit EBOV

183 *columns*). Furthermore, the Mander's coefficient index of correlation was quantified  
184 between the TMR-PS and eVP40-Alexa488 fluorescence signals of GUVs with varying  
185 lipid compositions (Fig. 1b). The index of correlation revealed no correlation between PS  
186 and eVP40 when anionic lipids were not abundant (DPPC:Chol:TMR-PS). Conversely, a  
187 notable increase in PS clustering was detected when eVP40-Alexa488 was incubated  
188 with DPPS GUVs (Fig. 1b;  $p=0.0544$ ). Furthermore, a statistically significant increase in  
189 PS clustering was detected when eVP40-Alexa488 was incubated with GUVs containing  
190 both DPPS and PI(4,5)P<sub>2</sub> (Fig. 1b;  $*p<0.0001$ ). These results suggest that eVP40 induces  
191 PS clustering *in vitro*, which is significantly enhanced in the presence of both PS and  
192 PI(4,5)P<sub>2</sub>, akin to the lipid composition typically found in the PM inner leaflet.

193         Next, we were interested to determine if eVP40 was able to induce PS clustering  
194 in synthetic membranes in the absence of PI(4,5)P<sub>2</sub>. Therefore, we performed a TMR  
195 self-quenching experiment as described previously[49,50]. The TMR fluorescent group  
196 has potent self-quenching properties when two molecules or more are brought to close  
197 distance from each other. Because of the low molar ratio of TMR-PS (0.2%) used in this  
198 assay, self-quenching is expected to be minimal in the absence of induced PS-clustering.  
199 We tested the ability of eVP40 to undergo TMR self-quenching when fluorescent PS was  
200 incorporated in lipid vesicles, as a secondary effect to eVP40-induced PS-clustering. We  
201 also tested different eVP40 concentrations and different PS ratios to investigate if TMR  
202 self-quenching was concentration dependent. The strongest TMR self-quenching in all  
203 membranes was observed at 1.5  $\mu$ M eVP40 (Fig. 1c). As expected, higher PS molar ratios  
204 resulted in stronger eVP40 induction of TMR self-quenching except for a high molar ratio  
205 of DPPS (60% molar ratio). However, the addition of PI(4,5)P<sub>2</sub> at 2.5% molar ratio to 60%

## Targeting PS levels to inhibit EBOV

206 DPPS-containing membranes rescued TMR self-quenching similarly to 40% DPPS-  
207 containing membranes. Further, DPPS-containing membranes at 60% molar ratio with or  
208 without PI(4,5)P<sub>2</sub> displayed a maximum of TMR-PS self-quenching at 2 μM eVP40. These  
209 observations may indicate a saturation of the liposome membranes with eVP40 at high  
210 PS concentrations. Altogether, this assay demonstrated that eVP40 is able to cluster PS,  
211 which is enhanced in the presence of PI(4,5)P<sub>2</sub>.

212 We next examined if eVP40 enhanced PS clustering in the PM of living cells. We  
213 first expressed monomeric EGFP in HEK293 cells supplemented with TMR-PS and  
214 examined the ability of confocal microscopy to detect PS clusters (Fig. 1d *top panel*, Fig.  
215 1e). As previously mentioned, PS selectively localizes into clustered regions[15,27,28];  
216 therefore, a basal degree of PS clustering should be observed. We developed a custom  
217 ImageJ macro to perform a moments-based thresholding analysis to identify regions of  
218 the PM with enriched PS content (Expanded View Fig. 3a). From there, we quantified the  
219 total area of these identified clusters as a percentage of the entire PM area. Through this  
220 analysis we were able to detect a basal level of PS enriched clusters in our control GFP  
221 expressing cells, with PS clusters accounting for approximately ~8% of the PM (Fig. 1d  
222 *top panel* and Fig. 1e). Our method was further validated by expressing an additional  
223 control protein with a glycosylphosphatidylinositol membrane anchor conjugated to GFP  
224 (GFP-GPI) in HEK293 cells supplemented with TMR-PS, which revealed PS clusters in  
225 ~8% of the PM area (Fig. 1e; Representative image available in Expanded View Fig. 3b  
226 *top panel*).

227 We next sought to determine if our technique accurately captured enhanced PS  
228 clustering, therefore, we expressed EGFP-Annexin A2 in HEK293 cells. Annexin A2 has

## Targeting PS levels to inhibit EBOV

229 been shown to enhance the clustering of PS in a calcium dependent manner[48].  
230 Therefore, in EGFP-Annexin A2 expressing cells, supplementation with TMR-PS was  
231 preceded with supplementing the cellular media with 10 mM calcium and 5  $\mu$ M of the  
232 calcium ionophore ionomycin. As shown in Fig. 1d&e, expression of EGFP-Annexin A2  
233 in cells significantly enhanced PS clustering roughly 2-fold, compared to EGFP  
234 expressing cells (\*\*p=0.0001). Taken together, these findings corroborate the previously  
235 reported effect of Annexin A2 on PS organization, as well as validate the method  
236 developed for our assay.

237 To further examine the selectivity of PS clustering for lipid-binding proteins that  
238 localize to the PM inner leaflet, we expressed EGFP-PLC $\delta$ -PH and EGFP-LactC2 in  
239 HEK293 cells supplemented with TMR-PS (Representative images available in  
240 Expanded View Fig. 3b, *middle & bottom panel*). EGFP-PLC $\delta$ -PH binds specifically to  
241 PI(4,5)P<sub>2</sub>, another critical component of many virus assembly processes, including  
242 filoviral assembly[39]. Again, EGFP-LactC2 specifically and reversibly binds to PS. As  
243 expected, expression of neither EGFP-PLC $\delta$ -PH or EGFP-LactC2 significantly altered the  
244 extent of PS clustering (Fig. 1e). This confirms that transient expression of fluorescently  
245 conjugated lipid-binding proteins is not sufficient to enhance PS clustering at the PM.

246 Finally, we evaluated the effect of eVP40 expression on PS organization across  
247 the PM. We independently expressed three functionally distinct EGFP fused eVP40  
248 constructs: WT-eVP40, K224A-eVP40, and WE/A-eVP40 and supplemented the cells  
249 with TMR-PS prior to imaging. Strikingly, expression of EGFP-WT-eVP40 increased PS  
250 clustering by ~2 fold (\*p=0.004), similar to the PS clustering observed with Annexin A2  
251 expression (Fig. 1d,e). However, expression of the PS-binding deficient mutant EGFP-

## Targeting PS levels to inhibit EBOV

252 K224A-eVP40 showed no significant change in PS clustering (Fig. 1d,e), supporting the  
253 hypothesis that eVP40 must interact with PS to promote its clustering at the PM.  
254 Additionally, to investigate if eVP40 matrix oligomerization was important for PS  
255 clustering, we expressed EGFP-WE/A-eVP40 in HEK293 cells. It is important to note that  
256 this mutant still colocalizes with PS at the PM (Expanded View Fig. 2a,f) albeit to a lesser  
257 extent than WT[43]. Although the WE/A-eVP40 and PS interaction is maintained in cells,  
258 no significant increase in PS clustering was observed (Fig. 1d,e). To the best of our  
259 knowledge, this is the first account of a filovirus matrix protein modulating the organization  
260 of PS within the PM. Moreover, these results demonstrate that both membrane binding  
261 and oligomerization of eVP40 is central to eVP40-mediated PS clustering.

262

### 263 **eVP40 membrane binding and oligomerization are dependent on** 264 **phosphatidylserine content in lipid membranes**

265 As eVP40 binds to PS through electrostatic and stereospecific interactions  
266 [14,31,37], we hypothesized eVP40 may require PS clustering for productive interactions  
267 at the PM during assembly. Enrichment of PS within regions of the PM would provide  
268 additional PS molecules available to recruit eVP40 to platforms of viral budding. To  
269 investigate how increasing the amount of PS within membranes dictates eVP40  
270 membrane affinity, surface plasmon resonance (SPR) was performed with His<sub>6</sub>-eVP40  
271 and large unilamellar vesicles (LUVs) with increasing concentrations of PS (from 1% to  
272 22 mol% PS; Fig. 2a-c). eVP40 displayed moderate binding to LUVs with 1% PS, with an  
273 apparent affinity of 2.5  $\mu$ M (Fig. 2a). However, increasing the concentration of PS to 11%  
274 increased the apparent affinity of eVP40 to 0.65  $\mu$ M (Fig. 2b). eVP40 displayed even

## Targeting PS levels to inhibit EBOV

275 stronger affinity to vesicles with 22% PS, with an apparent affinity of  $\sim 0.18 \mu\text{M}$  (Fig. 2c).  
276 These results indicate that by increasing the amount of PS in membranes, the affinity of  
277 eVP40 to lipid membranes can be modulated. This finding supports the hypothesis that  
278 PS clustering may be a mechanism for the virus to provide the necessary electrostatic  
279 contacts needed for matrix assembly during viral production.

280         Once at the PM, VP40 oligomerizes into the extensive matrix that gives rise to the  
281 stability and structure of the virion. Previously, Adu-Gyamfi *et al.* (2015) highlighted the  
282 importance of PS in this process, where a cell line deficient in PS synthesis showed a  
283 significant reduction in eVP40 oligomerization at the PM. Moreover, our confocal  
284 clustering data (Fig. 1d,e) revealed that eVP40 oligomerization is crucial for modulating  
285 PS organization into clustered domains. To investigate how increasing PS concentration  
286 alters eVP40 oligomerization, we utilized chemical crosslinking of His<sub>6</sub>-eVP40 which had  
287 been incubated with LUVs of increasing PS concentration (Fig. 2d,e). We found that when  
288 eVP40 is incubated with LUVs that contain 0% PS, no detectable higher order structures  
289 of eVP40 are found (Fig. 2d *lane 1*, Fig. 1e). However, by introducing 15% PS into LUVs,  
290 the extent of eVP40 oligomerization beyond dimeric eVP40 is significantly higher than  
291 when 0% PS LUVs are used (Fig. 2d *lane 2*, Fig. 1e). We next tested LUVs containing  
292 30% and 60% PS and found that eVP40 oligomerization was even more significantly  
293 detected than when just 15% PS was used (Fig. 2d *lane 3 and lane 4, respectively*, Fig.  
294 1e). Compared to LUVs with 0% PS, both 30% PS and 60% led to a significant increase  
295 in eVP40 oligomerization (\* $p=0.021$  and \* $p=0.017$ , respectively). Further, eVP40  
296 oligomerization appeared to saturate when 30% PS was included, as increasing PS  
297 content to 60% did not increase eVP40 oligomerization (compared to 30% PS). Taken

298 together, these studies suggest a dynamic relationship between PS clustering and eVP40  
299 affinity and oligomerization as a critical step in eVP40 viral assembly.

300

301 **Total cellular and plasma membrane levels of phosphatidylserine are reduced by**  
302 **fendiline treatment**

303 A recent study reported an FDA-approved drug, fendiline, inhibited K-Ras PM  
304 localization and signaling[35] and reduced PM PS content in MDCK cells[33]. Therefore,  
305 it was our goal to determine if fendiline could also reduce PS levels in the human cell line  
306 HEK293, a cell line commonly used in BSL-2 filovirus studies, and subsequently inhibit  
307 virus spread. The initial finding that fendiline reduced PS levels within the PM (40%  
308 reduction,  $IC_{50} \sim 3\mu M$ ) was conducted in MDCK cells using thin-layer chromatography[33],  
309 therefore it had not been established if this effect was cell-type specific. To address this,  
310 we first established fendiline's toxicity in HEK293 cells. After 24 and 48 hours of treatment,  
311 no significant toxicity was observed in treatments up to 5  $\mu M$  fendiline (Expanded View  
312 Fig. 4a). Next, to evaluate the effect of fendiline on PS in HEK293 cells, cells were treated  
313 with fendiline for 48 hours, harvested, and lipids were extracted and quantified by liquid  
314 chromatography-tandem mass spectrometry (LC-MS/MS). We observed a significant  
315 reduction in cellular PS levels compared to DMSO treated cells, after 48 hour treatment  
316 with 1  $\mu M$  fendiline ( $\sim 18\%$  reduction;  $*p=0.012$ ) and 5  $\mu M$  fendiline ( $\sim 30\%$  reduction;  
317  $***p=0.0003$ )(Fig. 3a). Fendiline exhibited no selectivity in reducing different PS species,  
318 as 5  $\mu M$  fendiline reduced long chain ( $C>38$ ) and saturated PS species nearly equally  
319 (Expanded View Fig. 4b). It is important to note that the effect of fendiline on PS was  
320 specific in that fendiline treatment had no significant effect on another anionic

## Targeting PS levels to inhibit EBOV

321 phospholipid, phosphatidic acid (Expanded View Fig. 4c). Therefore, our data supports  
322 the reported finding that fendiline reduced total cellular levels of PS, and that the effect is  
323 not cell dependent.

324 As PS is an integral anionic component of the PM inner leaflet, we sought to  
325 confirm that fendiline treatment also reduced PS levels within the PM in HEK293 cells.  
326 PS localization within the PM has been readily studied by expressing EGFP-LactC2 in  
327 mammalian cells[42,51]. Therefore, HEK293 cells expressing EGFP-LactC2 were  
328 imaged at 24 hours (representative images in Expanded View Fig. 4d) and 48 hours  
329 (representative images in Fig. 3b) post-treatment with increasing concentrations of  
330 fendiline. Single doses of 500 nM fendiline had no effect on EGFP-LactC2 PM localization  
331 at 24 or 48 hours post treatment (Expanded View Fig. 4e and Fig. 3c, respectively).  
332 However, we found a ~30% reduction in PM EGFP-LactC2 localization after 24 hours of  
333 treatment for both 1  $\mu$ M (\*\*p=0.0003) and 5  $\mu$ M fendiline (\*\*p=0.0045) (Expanded View  
334 Fig. 1e). However, a single dose of 1  $\mu$ M fendiline treatment did not significantly affect  
335 Lact-C2 PM localization after 48 hours of treatment (Fig. 3c). Conversely, a single dose  
336 of 5  $\mu$ M fendiline significantly reduced Lact-C2 PM localization even at 48 hours post  
337 treatment (~30% reduction; \*\*p=0.0031; Fig. 3c), a reduction similar to that observed at  
338 24 hours post treatment. These finding corroborate Cho *et al.* (2015) where reduction of  
339 PS levels by fendiline at the PM were slow acting but could be sustained with 5  $\mu$ M  
340 treatment after 48 hours[33] and were also consistent with our LC-MS/MS analysis (Fig.  
341 3a).

342

343 **Fendiline reduces PS clustering**



## Targeting PS levels to inhibit EBOV

344           Next, we hypothesized that reduced levels of PS within the PM would therefore  
345 reduce the degree of PS clustering. To determine if fendiline treatment reduced the  
346 degree of PS clustering, we utilized the Number & Brightness technique (N&B). N&B is a  
347 quantitative fluorescence microscopy technique that allows one to detect the aggregation  
348 state of proteins with pixel resolution in real time within living cells[52]. Previously, N&B  
349 was used to quantify PS clustering by analyzing the N&B profile of EGFP-LactC2[15]. To  
350 accurately capture PS clustering at the PM, imaging was performed at a focal plane near  
351 the cell surface. Importantly, HEK293 cells expressing monomeric EGFP were imaged  
352 and quantified to establish the experimental brightness value for a monomeric  
353 aggregation state (Expanded View Fig. 4f).

354           To evaluate PS clustering, HEK293 cells expressing EGFP-LactC2 were treated  
355 with the control or fendiline for 48 hours and the EGFP-LactC2 N&B profile was examined  
356 (Fig. 3d,e). Three different cluster bin sizes were examined, 1—5, 5-10 and >10. The  
357 average percentage of pixels in each bin was calculated and plotted (Fig. 3e). Within  
358 control-treated cells, significant aggregation of EGFP-LactC2 was observed, with 25%  
359 present in complexes of 5-10 LactC2 molecules and ~10% in complexes of >10 LactC2  
360 molecules (Fig. 3d *top panel* and Fig. 3e). This corroborates previous work investigating  
361 PS clustering, which found EGFP-LactC2 clusters up to 15 molecules in size[15].  
362 Treatment of cells with 1  $\mu$ M fendiline led to no significant change in PS clustering (Fig.  
363 3d *middle panel* and Fig. 3e) which was expected as 1  $\mu$ M fendiline had no significant  
364 effect on EGFP-LactC2 PM localization at 48 hours (Fig. 3b,c). Strikingly, 5  $\mu$ M fendiline  
365 treatment abolished the presence of EGFP-LactC2 complexes >10 molecules and  
366 significantly reduced the number of complexes of 5-10 LactC2 molecules large (from ~8%

## Targeting PS levels to inhibit EBOV

367 in DMSO to ~0% in 5  $\mu$ M fendiline; \*\* $p=0.0043$ ) (Fig. 3d *bottom panel* and Fig. 3e).  
368 Moreover, there was a significant (~23%) increase in EGFP-LactC2 complexes of ~1-5  
369 molecules in size in cells treated with 5  $\mu$ M fendiline compared to control treated cells  
370 (\*\*\*\* $p<0.0001$ ) (Fig. 3d *bottom panel* and Fig. 3e). Taken together, this data suggests that  
371 fendiline treatment disrupted large PS-dependent LactC2 complexes which was  
372 compensated by an increase in smaller PS-dependent complexes. Therefore, fendiline  
373 may possess antiviral properties by disassembling PS enriched regions that would  
374 otherwise have been used as platforms for viral assembly.

375

### 376 **Fendiline significantly inhibits authentic EBOV and MARV replication**

377 Recent studies have implicated PS as an essential component of the budding  
378 [14,43] and entry[22,23] of filovirus VLPs and authentic virions. To determine if the FDA-  
379 approved drug fendiline was able to inhibit authentic filovirus replication and spread, we  
380 first established the toxicity of fendiline in Vero E6 cells (Expanded View Fig. 5a) and then  
381 monitored the efficacy of fendiline at inhibiting EBOV and MARV replication in a BSL-4  
382 setting. Vero E6 cells, an established model for BSL-4 filovirus studies[53], were used to  
383 examine filovirus replication 48, 72 and 96-hours post-infection at different multiplicity of  
384 infection (MOI). Several different dosing regimens were designed to account for the slow  
385 response of fendiline in lowering cellular PS levels. The toxicity of fendiline in Vero E6  
386 cells was first established using treatment schedules that would directly mirror treatment  
387 schedules in the filovirus infection model. As can be seen in Expanded View Fig. 5a,  
388 minimal toxicity was observed compared to the vehicle (even at the highest treatment  
389 group of 20  $\mu$ M). Therefore, we proceeded with the filovirus infection model using

## Targeting PS levels to inhibit EBOV

390 treatments of fendiline up to 20  $\mu$ M. Cell treatment groups included increasing  
391 concentrations of fendiline (2.5 $\mu$ M, 5  $\mu$ M, 10  $\mu$ M, and 20  $\mu$ M) that were added to cell  
392 culture 24-hours prior to infection. An equivalent percent concentration of DMSO in  
393 culture media served as the vehicle control. Following removal of pretreatment  
394 compound, cells were then inoculated with either EBOV (Kikwit) or MARV (Ci67) at a  
395 multiplicity of infection MOI of 0.1 or 1.0, and incubated for 1 hour at 37C in 5% CO<sub>2</sub>, in  
396 a BSL-4 laboratory located at USAMRIID. Following infection, plates were separated into  
397 three post-infection treatment groups (day 0, every day dosing, or every other day  
398 dosing). In order to quantify viral replication, at 48 hours (MOI=1.0), 72 or 96 hours  
399 (MOI=0.1) post-infection, cells were washed and submerged in 10% neutral buffered  
400 formalin 24 hours prior to removal from the BSL-4 laboratory. Using virus specific  
401 antibodies to the glycoprotein (GP), cells were then imaged (Fig. 4a,e) and the percent of  
402 virus infected cells calculated using a high content imaging system (Fig. b-d, f-h).

403 Fendiline was most effective at reducing EBOV and MARV infection *in vitro* at the  
404 highest 20  $\mu$ M concentrations in each treatment group with statistically significant  
405 inhibition observed for both EBOV and MARV at each time point and each treatment  
406 group (excluding EBOV 48 hours, e.d.)(\*\*\*\* $p < 0.0001$ , \*\* $p < 0.0066$ ). Percent inhibition was  
407 directly affected by timing of treatments following infection. Furthermore, both EBOV and  
408 MARV treatment with fendiline e.d. had the highest inhibition on viral spread at each time  
409 point for 20  $\mu$ M fendiline treatments. Cells of the e.o.d. treatments group, which did not  
410 receive treatment immediately following infection with virus, had a dramatically reduced  
411 degree of inhibition as compared to the day 0 and e.d. treatment groups, both of which  
412 received fendiline immediately following viral infection of one hour.

413

414 **Fendiline reduced EBOV-VP40 but not MARV-VP40 localization to the plasma**  
415 **membrane**

416 As both EBOV and MARV-VP40 assembly at the PM is in part governed by PS,  
417 we first analyzed both EGFP-eVP40 and EGFP-mVP40 PM localization in cells treated  
418 with fendiline for 24 or 48 hours. Treatment with 1  $\mu$ M and 5 $\mu$ M fendiline had no significant  
419 effect on eVP40 PM at 24 hours post treatment (Expanded View Fig. 5b,c); therefore,  
420 EGFP-mVP40 PM localization was not assessed at 24 hours. Surprisingly, no significant  
421 change in EGFP-mVP40 PM localization was observed after 48 hours with either 1  $\mu$ M or  
422 5  $\mu$ M fendiline treatment (Fig. 4a *bottom panel* and Fig. 4b); therefore, mVP40 was  
423 excluded from further experiments. In agreement with our results thus far, 1  $\mu$ M fendiline  
424 did not significantly inhibit EGFP-eVP40 PM localization after 48 hours of treatment (Fig.  
425 5a *top panel* and Fig.5 c). However, treatment with 5  $\mu$ M fendiline for 48 hours led to a  
426 modest reduction in EGFP-eVP40 PM localization (~6% reduction compared to control  
427 treated cells; **not significant as**  $p=0.08$ ) (Fig. 5a *top panel* and Fig. 5c). However, the  
428 reduction of eVP40 PM localization was not robust enough to lead to the observed  
429 inhibition of EBOV by fendiline treatment in our BSL-4 studies (Fig. 4). One possible  
430 explanation is that a limitation of this technique is the inability to differentiate the extent of  
431 VP40 oligomerization occurring using basic confocal microscopy. Therefore, it is possible  
432 that fendiline reduced PS levels within the PM, but not significantly enough to block  
433 VP40's ability to bind to the PM.

434

435 **VP40 oligomerization is significantly reduced by fendiline treatment**

## Targeting PS levels to inhibit EBOV

436 PS is also a key factor promoting the self-assembly of VP40 into the matrix layer  
437 of the budding virion[14,43]. This self-assembly process has been highlighted in our *in*  
438 *vitro* crosslinking data (Fig. 2d,e) as well as previously reported in live cells utilizing the  
439 N&B technique[43]. To assess how fendiline impacted eVP40 oligomerization in cells, we  
440 examined the oligomerization profile of EGFP-eVP40 using the previously described  
441 N&B[39,43] (Fig. 5d,e). To accurately capture oligomerization at the PM, imaging was  
442 performed at a focal plane at the top of the cell. HEK293 cells expressing monomeric  
443 EGFP were imaged and quantified to calculate the experimental brightness value for a  
444 monomer (Expanded View Fig. 4f). The crystal structure and biochemical analysis of  
445 eVP40 suggests eVP40 binds to the PM as a dimer, subsequently oligomerizes into larger  
446 oligomers such as a hexamer, and these hexamers are building blocks for extensive  
447 filamentous formation [11]. Therefore, for our data to coincide with the current models of  
448 eVP40 oligomerization, EGFP-eVP40 oligomers were grouped into bins based on  
449 multiples of the hexamer (i.e. monomer-hexamer, hexamer-12mer, 12mer-18mer, and  
450 >18mer). The average percentage of pixels in each bin was calculated and plotted for  
451 HEK293 cells expressing EGFP-eVP40 and treated with either the control or indicated  
452 concentration of fendiline for 48 hrs (Fig. 5e).

453 Large eVP40 oligomeric structures corresponding to each bin size were readily  
454 detectable at the PM in control treated cells (Fig. 5d *top panel* and Fig. 5e), with ~72% of  
455 eVP40 found as a monomer-hexamer, ~16% as a hexamer-12mer, ~8% as a 12mer-  
456 18mer, and 3% in complexes >18mer. Treatment with 1  $\mu$ M fendiline led to a ~8%  
457 increase in monomeric-hexameric eVP40, and small decreases in the larger oligomeric  
458 structures, although no changes were statistically significant (Fig. 5d *middle panel* and

## Targeting PS levels to inhibit EBOV

459 Fig. 5e). However, the oligomeric profile of eVP40 was statistically different when cells  
460 were treated with 5  $\mu$ M fendiline. Following 5  $\mu$ M fendiline treatment, there was a  
461 significant increase in eVP40 found in the monomeric-hexameric state (~13% increase;  
462 \*\* $p=0.0035$ ) which was counterbalanced by an equal reduction in the larger oligomeric  
463 states (~6% reduction for hexamer-12mer, 5% reduction for 12mer-18mer, and ~3%  
464 reduction for eVP40 structures >18mer) (Fig. 5d *bottom panel* and Fig. 5e). These results  
465 support our hypothesis that by reducing PS concentration and therefore the pool of PS  
466 available for clustering, eVP40 is unable to properly oligomerize once it traffics and binds  
467 to the PM. This, in combination with the modest reduction in eVP40 PM binding following  
468 fendiline treatment, may therefore impact the production of viral particles as suggested  
469 from our BSL-4 studies.

470

### 471 **Fendiline reduced VLP production at the plasma membrane**

472 As fendiline reduced VP40 oligomerization, we sought to determine the effect of  
473 fendiline treatment on VLP production using functional budding assays. VLPs were  
474 harvested at 24 (Fig. 6a,b) and 48 hours (Fig. 6c,d) post-treatment and the relative  
475 budding index was determined with western blotting and densitometry analysis. No  
476 significant effect on VLP production was observed for cells treated with 0.5  $\mu$ M or 1  $\mu$ M  
477 fendiline at either 24 (Fig. 6a *lane 3,4* and Fig. 6b) or 48 hours post-treatment (Fig. 6c  
478 *lanes 3,4* and Fig. 6d). However, treatment with one dose of 5  $\mu$ M fendiline for 24 hours  
479 led to a ~25% reduction in VLP production (Fig. 6a *lane 5* and Fig. 6b) compared to DMSO  
480 treated cells (Fig. 6a *lane 2* and Fig. 6b). More importantly, this reduction in VLP  
481 production was even more robust when monitored at 48 hours post-treatment, with a

## Targeting PS levels to inhibit EBOV

482 statistically significant ~60% reduction in the relative budding efficiency of 5  $\mu$ M fendiline  
483 treated cells (\*p=0.0260) (Fig. 6c *lane 5* and Fig. 6d) compared to DMSO treated cells  
484 (Fig. 6c *lane 2* and Fig. 6d). The reduction in VLPs is supported by our previous findings  
485 that a single dose of 5  $\mu$ M fendiline reduced PS levels, PS clustering and the extent of  
486 eVP40 oligomerization at the PM. Therefore, we hypothesize that reduced virus budding  
487 is at least partially responsible for fendiline efficacy in authentic EBOV studies (Fig. 4).

488 To further investigate the reduction of VLP production in fendiline treated cells, and  
489 to determine if there were any observable morphological changes in VLPs, scanning  
490 electron microscopy (SEM) experiments were performed on mock transfected cells (Fig.  
491 6e) and cells expressing FLAG-eVP40 (Fig. 6f). Cells were treated with either the control,  
492 1  $\mu$ M or 5  $\mu$ M fendiline for 48 hours. SEM revealed the presence of filamentous  
493 protrusions from the PM of mock transfected cells in untreated and control treated cells  
494 (Fig. 6e). In both control and fendiline treated cells expressing FLAG-eVP40, a dense  
495 filamentous protrusion population was observed at the surface of cells, indicating  
496 abundant VLP production (Fig. 6f). This extensive budding of VLPs was present in  
497 untreated, DMSO treated, and 1  $\mu$ M fendiline treated cells expressing FLAG-eVP40 (Fig.  
498 6f). Importantly, micrographs of cells expressing FLAG-eVP40 and treated with 5  $\mu$ M  
499 fendiline revealed minimal VLP production at the PM compared to control treated cells  
500 (Fig. 6f). These findings support the hypothesis that fendiline treatment considerably  
501 reduces the production of VLPs in eVP40 expressing cells.

502

503 **VLP morphology is altered by fendiline treatment**

## Targeting PS levels to inhibit EBOV

504           The structure and stability of filoviruses is derived from the VP40 matrix underlying  
505 the lipid envelope of virions. Therefore, we utilized transmission electron microscopy  
506 (TEM) of purified VLPs to determine if disturbing matrix assembly and altering the lipid  
507 components of the PM with fendiline treatment changed VLP morphology and possibly  
508 infectivity (Fig. 7a-c). During filoviral entry, surface exposed GP and viral envelope PS  
509 interact with the receptor T-cell immunoglobulin receptor-1[18,22] (TIM-1). To recapitulate  
510 entry-competent VLPs (eVLPs), we co-expressed eVP40 with the Ebola virus  
511 glycoprotein (eGP). We performed TEM of eVLPs purified from control and 5  $\mu$ M fendiline  
512 treated cells (48-hour treatment) and used ImageJ software to analyze VLP length and  
513 diameter (Fig. 7a-c). Control eVLPs were heterogenous in length with a mean length of  
514 4.1  $\mu$ m  $\pm$  2.9 (Fig. 7a *left panel* and Fig. 7b). Control eVLPs diameter also exhibited a  
515 level of heterogeneity but had a fairly consistent diameter of 75 nm  $\pm$  12.9, which is similar  
516 to previous studies of both virions and VLPs[2,7] (Fig. 7a *left panel* and Fig. 7c). The  
517 length and diameter of eVLPs derived from 5  $\mu$ M fendiline treated cells were significantly  
518 less than control eVLPs. Strikingly, fendiline treatment reduced eVLP length by ~35%,  
519 from 4.1  $\mu$ m to 2.7  $\mu$ m (\*p=0.0139) (Fig. 7a *right panel* and Fig. 7b) and modestly but  
520 statistically significantly reduced eVLP diameter (\*p=0.043) (Fig. 7a *right panel* and Fig.  
521 7c). To ensure that eVLPs derived from fendiline treated cells were not more susceptible  
522 to damage during the purification, circular dichroism thermal melting was performed and  
523 no difference in eVLP stability was observed (Expanded View Fig. 6). Reduced eVLP  
524 length and diameter could translate into reduced infectivity (e.g., less PS and less surface  
525 area and membrane available to bind TIM-1), therefore we next sought to determine the  
526 effect of fendiline on eVLP entry.



527

528 **Fendiline blocks EBOV eVLP entry**

529 A common characteristic of viral infectivity is the relationship between virion  
530 associated PS and the TIM-1 receptor on target cells[18,22,23,54,55]. Moreover, it has  
531 been previously reported that other ASM inhibitors blocked EBOV infectivity[56]. To  
532 determine if fendiline treatment reduced the entry of eVLPs, we performed a fluorescent  
533 based entry assay using 1,1'-dioctadecyl-3,3,3',3'-tetramethylindocarbocyanine  
534 perchlorate (DiI) labelled eVLPs[20,57,58]. DiI labelled eVLPs were derived from cells  
535 treated with either control or 5  $\mu$ M fendiline. By testing entry of eVLPs derived from  
536 fendiline treated cells rather than the entry of eVLPs on fendiline treated cells, we were  
537 able to determine how fendiline treatment affected eVLP entry rather than how inhibition  
538 of ASM in target cells affected eVLP entry (as previously described[56]). In brief, eVLPs  
539 derived from both control and fendiline treated cells were purified and labelled with DiI,  
540 incubated with target cells overexpressing increasing amounts of TIM-1, and the DiI signal  
541 was imaged using confocal microscopy (Representative images in Fig. 7d). If entry of the  
542 eVLPs was not altered by fendiline treatment, one would expect a dose-dependent  
543 increase in infectivity with increasing TIM-1 expression. Conversely, if eVLP entry was  
544 inhibited by fendiline treatment, a dose-dependent increase in eVLP entry would not be  
545 observed with increasing TIM-1 expression.

546 For all VLPs, non-specific entry was observed for target cells lacking TIM-1  
547 overexpression (~1.7-1.9 DiI/infected cell, Fig. 7d *left panel* and Fig. 7e). This was not  
548 unexpected, as normal endocytic processes were not inhibited in these experimental  
549 conditions. However, as TIM-1 overexpression increased in target cells, a detectable and

## Targeting PS levels to inhibit EBOV

550 significant dose-dependent increase in control eVLP entry was observed, by more than  
551 200% in the highest TIM-1 overexpressing cells (compared to no TIM-1 overexpression;  
552 Fig. 7d *top panel* and Fig. 7e). Remarkably, no measurable increase in eVLP entry was  
553 observed for fendiline derived-VLPs across any of the TIM-1 overexpressing target cell  
554 conditions (Fig. 7d *bottom panel* and 7e). From this comparison, these results suggest  
555 that the impaired entry of fendiline eVLPs is a result of reduced PS in the viral envelope,  
556 either from smaller VLPs or a lower % of PS content. These findings in combination with  
557 the observed reduction in VLP formation further substantiate the significant reduction of  
558 EBOV infection observed in our live virus studies following fendiline treatment.

559

### 560 **Mathematical model of *in vitro* experiments**

561 We next used a mathematical model to predict how the effects of fendiline on both  
562 viral budding and entry combine to produce the observed effects in the BSL-4 assays.  
563 We calibrate our mathematical model (equations 1-3) to experimental data from the  
564 budding, entry and cellular infection assays using approaches and parameter settings  
565 outlined in the methods and Table 1. Results from our two-phase calibration procedure  
566 are shown in fig. 8a-f and Expanded View fig. 7. The model captures key features of the  
567 data including a progressive increase in percentage of infected cells over time,  
568 differences between MOI as well as limited cell death in the first 48 hours of the  
569 experiment (Expanded View Fig. 7).

570 The dynamics behind these calibrated figures suggested that fendiline treatment  
571 significantly delayed the infection process (Fig. 8g,h), resulting in the observed decrease  
572 in percent infected cells with treatment over 4 days. The effects of fendiline on budding

## Targeting PS levels to inhibit EBOV

573 and entry are estimated to have similar pharmacodynamics (PD), with entry effects  
574 estimated to have a slightly stronger response (lower  $C_{50}$  and higher  $E_{max}$ ) compared to  
575 budding (Table 1). Based on PD parameters, the response to fendiline was estimated to  
576 be weaker in the BSL-4 assays, as is evident by higher  $C_{50}$  values and lower  $E_{max}$  values  
577 compared to the budding and entry assays (Table 1, Fig. 8i). These PD parameter  
578 differences between budding and entry assays vs BSL-4 results could suggest that other  
579 parts of the viral life cycle not affected by fendiline (not quantified explicitly in these  
580 experiments) become rate limiting in the BSL-4 assays, thereby reducing the overall effect  
581 of fendiline on infection progression. In summary, a mathematical model consistent with  
582 three independent experimental systems, predicts a combination of budding and entry  
583 effects resulting in the observed BSL-4 effects, and estimates PD parameters for each  
584 mechanism.

585

## 586 Discussion

587 The host cell PM is exploited by filoviruses for their assembly and budding, where  
588 they can egress the host cell to form a new virion. The matrix protein, VP40, is the main  
589 driver of this process as it harbors a high affinity for lipids in the PM inner leaflet. Lipid  
590 binding by VP40, which includes selectivity for PS[14,31,37,38] and PI(4,5)P<sub>2</sub>[39] drives  
591 and stabilizes, respectively, VP40 oligomers that are necessary for viral budding. In fact,  
592 VP40 has been shown to be sufficient (in the absence of other filovirus proteins) to form  
593 VLPs from the host cell PM that are nearly indistinguishable from virions[6–8]. Again, this  
594 underscores the unique properties of VP40 structure and sequence, which provides a  
595 template for host lipid binding, oligomerization, and sufficient information to encode cues

## Targeting PS levels to inhibit EBOV

596 for scission to complete the viral budding process. Further, VP40 derived VLPs enter cells  
597 in a PS-dependent manner despite the absence of the EBOV glycoprotein[19]. While  
598 some of the basic principles between VP40 and PM interactions have been previously  
599 revealed, the mechanistic consequences of the interactions and their potential  
600 pharmacological targeting have remained unknown.

601 In this study, we demonstrated that VP40 was able to cluster PS *in vitro* and in the  
602 PM of cells. VP40-dependent PS clustering required PS binding and efficient PM  
603 localization of VP40, as the K224A-VP40 mutant, previously defined as a PS-binding  
604 residue did not significantly increase PS clustering. VP40 oligomerization was also crucial  
605 to PS clustering efficiency as a VP40 oligomerization deficient mutant, which can still  
606 exhibit PM localization, significantly reduced PS clustering. This is an important point as  
607 the PM of host cells is generally thought to harbor 20-30 mol% PS in the inner leaflet. In  
608 fact, VP40 effectively binds and oligomerizes on PS-containing membranes with  
609 compositions close to the PS-content of the PM inner leaflet. In contrast, PS  
610 concentrations below 15 mol% didn't provide robust affinity and oligomerization compared  
611 to those with 22 mol% PS and greater. PS clustering and PS content may also play a  
612 critical role in the loss of asymmetry that occurs during the EBOV budding process. For  
613 instance, pooling of PS in distinct regions of VP40 assembly may provide a cue for  
614 scramblases shown to distribute PS to the outer leaflet of the PM during the viral budding  
615 process[57,59].

616 A recent study demonstrated that silencing PSS1, an enzyme responsible for PS  
617 synthesis in mammalian cells was sufficient to inhibit EBOV replication[59]. However, to  
618 the best of our knowledge, small molecules aimed at targeting host cell lipid distribution

## Targeting PS levels to inhibit EBOV

619 have not previously been tested against EBOV. Fendiline was a logical choice to form an  
620 initial hypothesis of an FDA-approved drug that could inhibit EBOV budding as it was  
621 recently shown to lower PM PS[33] and inhibit K-Ras signaling[34,35] suggesting this  
622 FDA-approved drug may be sufficient to inhibit EBOV budding. Indeed, in BSL-4  
623 experiments, fendiline was able to inhibit EBOV replication >75% at 20  $\mu$ M and MARV  
624 replication >90% when given every day post-infection. Follow up mechanistic studies  
625 demonstrated that fendiline efficacy was due to inhibition of VP40 oligomerization, viral  
626 budding and viral entry. Thus, fendiline, which reduced the PS content of HEK293 cells  
627 by ~30%, subsequently reduced PS clustering and VP40 oligomerization necessary for  
628 efficient viral budding. VLPs that did form from fendiline-treated cells had an overall  
629 reduced length and surface area, which likely combined with the reduced PS-content of  
630 the virus or VLPs to limit subsequent viral entry. Thus, disruption of PM PS content by  
631 one small molecule was sufficient to effect at least three important steps in the filovirus  
632 life cycle.

633 Overall, this study lends credence to the hypothesis that host processes may be  
634 targeted to inhibit viral replication and spread. While the potency of fendiline may be low,  
635 the combination of fendiline with other FDA-approved drugs that have shown efficacy  
636 against EBOV[60–64] hold further promise. These studies also lay a framework to  
637 improved pharmacological targeting strategies against either VP40 matrix assembly or  
638 PS clustering that would not only reduce viral budding and spread, but lower subsequent  
639 viral entry, which partially relies on PS in the viral envelope[18,19,22,32]. Notwithstanding  
640 pharmacological principles learned from this study, a critical balance between VP40 and  
641 PS has been resolved demonstrating a critical need for VP40 clustering in the assembly

642 and budding process. VP40 oligomers are needed for enhanced PS clustering where PS  
643 clustering seems to ensure optimal VP40 oligomerization.

644

## 645 **Methods**

### 646 **Reagents & solutions**

647 PBS, DMEM, ionomycin and Lipofectamine LTX + Plus were purchased from  
648 Fisher Scientific, heat-inactivated fetal bovine serum (FBS) was purchased from Hyclone,  
649 and Minimum Essential Medium (MEM) was purchased from Corning. Invitrogen Live Cell  
650 Imaging Solution, Dil Stain, Halt Protease inhibitor cocktail, Pierce BCA Assay kit, and  
651 BS3 were purchased from ThermoFisher Scientific. Non-essential amino acids (NEAA)  
652 were purchased from Sigma Aldrich and L-glutamine was purchased from Gibco. Alexa  
653 Fluor™ 488 C<sub>5</sub> Maleimide (Alexa-488) for protein conjugation was purchased from  
654 Invitrogen. Fendiline was purchased from Cayman Chemical, prepared in DMSO and  
655 stored at -20 °C. Ultra-Pure Grade DMSO was purchased from VWR and the Ni-NTA  
656 slurry was purchased from Qiagen. L1 chips for SPR experiments were purchased from  
657 GE Healthcare. For cell viability assays, CellTiter-Glo® was purchased from Promega.  
658 Antibody information for immunoblotting and immunofluorescence can be found in Table  
659 1. Ten percent neutral buffered formalin was purchased from Val Tech Diagnostics  
660 (Brackenridge, PA). Cell staining buffer was purchased from BioLegend. Invitrogen™  
661 Molecular Probes™ Hoechst 3342 stain was purchased from Fisher Scientific.

662

### 663 **Plasmids**

## Targeting PS levels to inhibit EBOV

664 EGFP, EGFP-eVP40 and EGFP-WE/A-eVP40 were prepared as described  
665 previously[39,43]. GFP-K224A-eVP40 was prepared by site directed mutagenesis[40]  
666 GFP-mVP40 was used as described previously[10,16]. The GFP-LactC2 plasmid was a  
667 kind gift from Sergio Grinstein (University of Toronto). GFP-PLC $\delta$ PH was a kind gift from  
668 Tamas Balla (NIH). pCAG-GPI-GFP was a gift from Anna Katerina Hadjantonakis  
669 (Addgene #32601). pEGFP-N3-Annexin A2 was a gift from Volker Gerke & Ursula  
670 Rescher (Addgene #10796). pCAGGS-FLAG-eVP40 (NR49337) and pcDNA3.1-eGP  
671 (NR-19814) were obtained from BEI Services. pCAGGS-TIM-1 was from Heinz  
672 Feldmann[65].

673

### 674 **Lipids and LUV preparation**

675 All lipids were purchased from Avanti Polar Lipids, Inc. (Alabaster, AL) and stored  
676 in chloroform and/or methanol at -20°C until use. POPC (#850457), DPPC (#850355),  
677 Chol (#700000), DPPS (#840037), POPE (#850757), POPS (#840034), Brain PI(4,5)P<sub>2</sub>  
678 (#840046) and TopFluor® TMR-PS (#810242). For large unilamellar vesicle (LUV)  
679 preparation used in SPR and chemical crosslinking experiments, lipid mixtures were  
680 prepared at the indicated compositions, dried down to lipid films under a continuous  
681 stream of N<sub>2</sub>, and stored at -20°C until further use. On each day of experiments, LUVs  
682 were brought to room temperature, hydrated in either SPR buffer (10 mM HEPES, 150  
683 mM NaCl, pH 7.4) or chemical crosslinking buffer (260  $\mu$ M Raffinose pentahydrate in  
684 PBS, pH 7.4), vortexed vigorously, and extruded through a 100 nm (SPR experiments) or  
685 200 nm (chemical crosslinking experiments) filter. Vesicle size was confirmed by dynamic  
686 light scattering using a DelsaNano S Particle Analyzer (Beckman Coulter, Brea, CA).

687

## 688 **Preparation and imaging of GUVs**

689 GUVs were prepared by a gentle hydration method.[66–68] Briefly, 1 mM of lipid  
690 control mixture was made and contained 1,2-dipalmitoyl-sn-glycero-3-phosphocholine  
691 (DPPC), cholesterol (Chol) and fluorescent phosphatidylserine (TopFluor® TMR-PS) at  
692 90:9.8:0.2% molar ratio. For PS clustering and eVP40 binding analysis, 1,2-dipalmitoyl-  
693 sn-glycero-3-phosphoserine (DPPS) alone or with brain phosphatidylinositol 4,5-  
694 bisphosphate PI(4,5)P<sub>2</sub> were added at 40 and 2.5% molar ratios, respectively, and the  
695 ratios of DPPC were adjusted accordingly. The lipid mixtures were prepared in 5 mL  
696 round-bottom glass flasks and the chloroform was removed with rotary movements under  
697 a continuous stream of N<sub>2</sub>. The lipid films were then hydrated over night at 50°C  
698 (DPPC:Chol:TopFluor TMR-PS) and 55°C (DPPC:Chol:DPPS:PI(4,5)P<sub>2</sub>:TopFluor TMR-  
699 PS) in an appropriate volume of GUV hydration buffer (150 mM NaCl, 10 mM HEPES,  
700 0.5 M sucrose, pH 7.4).

701 For imaging, the freshly hydrated GUVs were diluted 10 times in GUV dilution  
702 buffer (150 mM NaCl, 10 mM HEPES, 0.5 M glucose, pH 7.4) and placed on a 6-mm  
703 diameter chamber made from a silicon sheet using a core sampling tool (EMS # 69039-  
704 60). The silicon chamber was mounted on a 1.5-mm clean coverglass (EMS # 72200-31)  
705 pre-coated with 1 mg/mL BSA. The set up was then assembled in an Attofluor chamber  
706 (Invitrogen # A7816) and 1.25 μM eVP40-Alexa488 was added. GUVs imaged for eVP40  
707 and PS colocalization and clustering analysis was performed at 37°C on a Nikon Eclipse  
708 Ti Confocal inverted microscope (Nikon Instruments, Japan), using a Plan Aplanachromat  
709 60x 1.4 numerical aperture oil objective and a 100x 1.45 numerical aperture oil objective,



## Targeting PS levels to inhibit EBOV

710 respectively. A 488 nm argon laser was used to excite GFP and a 561 nm argon laser  
711 was used to excite TopFluor®-TMR-PS. The 3D reconstruction was performed using  
712 ImageJ. Mander's correlational analysis was performed using the plugin JACoP.[69]

713

### 714 **Cell culture, transfections, pharmacological treatments**

715 All BSL-2 studies were performed using HEK293 cells obtained from the American  
716 Type Culture Collection and cultured in DMEM supplemented with 10% FBS and 1% PS.  
717 Transient transfections were performed using Lipofectamine LTX + PLUS, according to  
718 the manufacturer's protocol. All transfections were performed in DMEM supplemented  
719 with 10% FBS. Treatment with fendiline (in DMSO) occurred at 5-hours post-transfection  
720 in DMEM supplemented with 10% FBS. BSL-4 assays were also performed using Vero  
721 E6 cells cultured in MEM, 5% heat-inactivated fetal bovine serum, 1% L-glutamine, and  
722 1% NEAA. Both HEK293 and Vero E6 cells were cultured and incubated at 37°C, 5%  
723 CO<sub>2</sub>, 80% humidity.

724

### 725 **Immunoblotting**

726 Samples prepared for western blotting analysis were first separated using SDS-  
727 PAGE (8% for chemical crosslinking and 12% for cell lysates and VLPs). Following  
728 transfer onto a nitrocellulose membrane, membranes were blocked with 5% MILK-TBST  
729 and analyzed with their respective antibodies (See Supplement Table 1). Antibodies were  
730 detecting using an ECL detection reagent and imaged on the ImageQuant LAS 4000 or  
731 Amersham Imager 600 (GE Healthcare Life Sciences). All quantitative analysis derived  
732 from western blotting was performed using densitometry analysis in ImageJ.

733

734 **Protein purification and Alexa-488 C<sub>5</sub> Maleimide labelling**

735 The His<sub>6</sub>-eVP40-pET46 expression vector was a kind gift from Erica Ollmann  
736 Sapphire (La Jolla Institute for Immunology) and was expressed and grown in Rosetta2  
737 BL21DE3 cells (Merck Millipore, Billerica MA). The pet28a-His<sub>6</sub>-Lact C2 bacterial  
738 expression plasmid was a kind gift from Dr. Sergio Grinstein. His<sub>6</sub>-eVP40 and His<sub>6</sub>-LactC2  
739 were grown and purified as described previously[39]. Following elution from a Ni-NTA  
740 slurry (Qiagen), the protein samples were then further purified using size exclusion  
741 chromatography on a HiLoad 16/600 Superdex 200 pg column (ÄKTA pure, GE  
742 Healthcare). The desired fractions containing dimeric VP40 or monomeric LactC2 were  
743 collected, concentrated and stored in 10 mM Tris, 300 mM NaCl, pH 8.0. Protein  
744 concentration was calculated using the Pierce BCA assay and the protein was stored at  
745 4°C for no longer than 14 days.

746 Labeling of eVP40 cysteine residues was carried out using Alexa-488- C<sub>5</sub>-  
747 maleimide. eVP40 dimer was treated with a 1.5-fold molar excess of Alexa-488-C<sub>5</sub>-  
748 maleimide dissolved in DMSO for 2 hours at room temperature in maleimide labelling  
749 buffer (20 mM NaPi solution pH 7.4, 150 mM NaCl, 4 M Guanidine HCl). The labeling  
750 reaction was quenched by adding dithiothreitol (final concentration of 50 mM) and the  
751 labeled protein was separated from the non-conjugated dye on a HiLoad 16/600  
752 Superdex 200pg column. Fractions containing eVP40 dimeric form were collected and  
753 concentrated. The labelling efficiency and protein concentration were estimated using a  
754 NanoDrop according to Invitrogen's instructions.

755

756 **Plasma membrane localization confocal microscopy**

757 Live cell imaging experiments were performed at 24 hours and 48 hours post  
758 treatment. Experiments to quantify fluorescent protein PM localization were performed on  
759 a Zeiss LSM 710 inverted microscope using a Plan Aplanachromat 63x 1.4 numerical  
760 aperture oil objective. A 488 nm argon laser was used to excite GFP/EGFP. GFP-LactC2  
761 PM localization was quantified ratiometrically by comparing the PM signal vs. the cytosolic  
762 signal. GFP-EBOV-VP40 and GFP-MARV-VP40 PM localization was quantified  
763 ratiometrically by comparing the PM signal vs. the total fluorescence signal within the cell.

764

765 **TMR-PS quenching experiment**

766 The Top Fluor TMR quenching analysis was performed as described  
767 previously[50]. Briefly, LUVs with 0.5% TopFluor® TMR-PS and increasing amounts of  
768 DPPS (0, 1, 5, 10, 20, 40, 60%) with or without PI(4,5)P<sub>2</sub> (2.5% with 60% DPPS) were  
769 made as described above. LUVs were then mixed at a final concentration of 40 μM with  
770 corresponding concentrations of eVP40 dimer in 10 mM HEPES, 160 mM NaCl pH 7.4 in  
771 a black/clear bottom 96-well plate and incubated at 37°C for 30 min. The Top Fluor TMR  
772 was excited at 547 nm and the fluorescence was recorded from 555 to 600 nm with no  
773 cutoff wavelength using the plate reader SpectraMax M5e (Molecular Devices, St Jose,  
774 CA). The fluorescence quenching ratio,  $\Delta F$ , was calculated according to the ratio ( $F_0/F$ ),  
775 where  $F_0$  is the fluorescence in absence of protein and  $F$  is the fluorescence at a given  
776 eVP40 concentration.

777

778 **Cellular Top Fluor TMR-PS clustering confocal microscopy**

## Targeting PS levels to inhibit EBOV

779 Each experimental day, a 100  $\mu$ M working stock of TopFluor® TMR-PS in  
780 methanol was prepared. Immediately prior to imaging, cells were placed in 4°C for 5 min.  
781 The working stock was diluted to a final 500 nM TopFluor® TMR-PS solution in 3 mg/mL  
782 BSA/PBS. The 500 nM TopFluor® TMR-PS/BSA/PBS solution was incubated with cells  
783 at 4°C for 10 min, rinsed three times with cold PBS, and immediately imaged in fresh cold  
784 PBS. Top Fluor TMR was excited at 560 nm and GFP was excited at 488 nm. For PS  
785 clustering analysis, a custom macro in ImageJ was used. Prior to the macro analysis  
786 background was subtracted, and the contrast was enhanced. To isolate the PM area, a  
787 default threshold was applied. To isolate PS clusters the Moments analysis  
788 thresholding[70] was applied. Following the moments analysis thresholding, the custom  
789 ImageJ macro was applied: despeckle, close-, fill holes, and remove outliers (radius=5,  
790 threshold=50). The sum of the remaining particles area was calculated, as well as the PM  
791 area. %PS clustering was calculated according to the ratio ( $\text{Area}_{\text{clusters}}/\text{Area}_{\text{plasma membrane}}$ ).

### 792 **Number & Brightness**

793 Number & Brightness experiments were performed as described  
794 previously[15,39,43] on a Zeiss LSM 880 upright microscope using a LD “C-Apochromat”  
795 40x/1.1 W Corr M27 objective. HEK293 cells expressing either GFP, GFP-LactC2 or  
796 GFP-eVP40 were treated with fendiline (1 or 5  $\mu$ M) for 48-hours prior to N&B analysis.  
797 Cells were imaged in phenol-free live cell imaging solution. For each experimental day,  
798 the brightness value of a monomer was determined in cells expressing monomeric GFP.  
799 Each image was acquired using the same laser power (0.01), resolution (256x256), pixel  
800 dwell time (16 us), frames (50), and zoom (pixel size of 50 nm). SimFCS Globals Software

## Targeting PS levels to inhibit EBOV

801 (Laboratory for Fluorescence Dynamics, University of California, Irvine, CA) was used for  
802 analysis.

803

### 804 **Chemical crosslinking**

805 His<sub>6</sub>-eVP40 and His<sub>6</sub>-LactC2 were purified as previously described in *Protein*  
806 *Purification*. LUVs containing POPC and Brain PI(4,5)P<sub>2</sub> (2.5%) with varying PS mol%  
807 composition (0, 15,30, 60%) were prepared as previously described in *Lipids & Vesicle*  
808 *Preparation*. Experimental protocol was adapted from Johnson K.A. *et al* 2016, and the  
809 manufacturers protocol for BS<sup>3</sup> (ThermoFisher) with each step performed at RT. In brief,  
810 protein (final concentration of 0.3 μM in PBS pH 7.4) was mixed with LUVs (final  
811 concentration = 660 μM) at a 1:1 volumetric ratio for 30 min. Protein bound LUVs were  
812 separated from unbound protein through centrifugation (75,000 x g, 30 min, 22°C), and  
813 resuspended in PBS (pH 7.4) buffer containing BS<sup>3</sup> (final concentration- 200 μM).  
814 Samples were incubated for 45 min, quenched with glycine for 15 min and then analyzed  
815 through western blotting. Following immunoblotting, oligomerization of VP40 was  
816 quantified ratiometrically by comparing VP40<sub>o</sub> vs. VP40<sub>m+d</sub> (where VP40<sub>o</sub> is the oligomeric  
817 VP40 band density (>75 kDa) and VP40<sub>m+d</sub> is the sum of monomeric and dimeric eVP40  
818 (~37 and 74 kDa) band density).

819

### 820 **Surface plasmon resonance**

821 To determine the affinity of 6xHis-eVP40 to LUVs with increasing PS  
822 concentrations, SPR was performed. SPR experiments were performed at 25°C using a  
823 Biacore X100 as described previously.[14] In brief, an L1 chip was coated at 5 μL/min

## Targeting PS levels to inhibit EBOV

824 with LUVs containing 0% PS on flow cell 1 and either 1%, 11% or 22 mol% POPS on flow  
825 cell 2 (LUV preparation described in previous section, *Lipids and Vesicle Preparation*).  
826 The LUV conjugated chip was stabilized by washing with 50 mM NaOH and blocked with  
827 0.1 mg/mL BSA (in SPR buffer) at a flow rate of 10  $\mu$ L/min until the response on each  
828 flow cell was <100 response units (RU). For quantitative affinity analysis, each  
829 concentration of eVP40 was injected for 540 s at a flow rate of 10  $\mu$ L/min with a 180 s  
830 delay, and the difference in response between flow cell 1 and flow cell 2 was recorded  
831 ( $\Delta$ RU). The apparent  $K_d$  of vesicle binding was determined using the non-linear least  
832 squares analysis:  $R_{eq} = R_{max}/(1 + \frac{K_d}{C})$  where  $R_{eq}$  (measured in RU) is plotted against  
833 protein concentration (C).  $R_{max}$  is the theoretical maximum RU response and  $K_d$  is the  
834 apparent membrane affinity. Data were fit using the Kaleidagraph fit parameter of  
835  $(m_0 * m_1)/(m_0 + m_2); m_1 = 1100; m_2 = 1$ .  $\Delta$ RU data was normalized in GraphPad Prism 8 for  
836 windows (La Jolla, CA) and plotted in Kaleidagraph (Reading, PA).

837

### 838 **Lipidomics**

839 HEK293 cells were treated with the indicated concentration of fendiline for 48  
840 hours, collected through centrifugation, rinsed with PBS and protein concentration was  
841 determined. Cells were pelleted, flash frozen in liquid N<sub>2</sub> and stored at -80°C until  
842 subsequent LC/MS/MS processing by Avanti Polar Lipids, Inc.. Prior to LC-MS/MS  
843 analysis, lipids were extracted using the Folch method.[71] The bottom chloroform layer  
844 taken after centrifugation was diluted with internal standards for LPA, LPS, PA and PS  
845 for quantization by injection on LC-MS/MS. Samples were injected on a LC-MS/MS  
846 method using a Waters Acquity UPLC / AB Sciex 5500 MS system performing reversed

## Targeting PS levels to inhibit EBOV

847 phase separation of LPA and LPS and PA and PS components with MS/MS detection.  
848 Each molecular species identified by the [M-H] m/z of its acyl carbon:double bond (CC:DB  
849 i.e. 34:2 PA) was quantified against the response of the internal standards of known  
850 concentration. Content of individual and total LPA/PA and LPS/PS was reported. Values  
851 were corrected to  $1 \times 10^6$  cells for all samples.

852

### 853 **BSL-4 immunofluorescence assay**

854 Vero E6 cells were seeded at  $2 \times 10^4$  cells/well in black 96-well poly-D-lysine treated  
855 plates (Greiner Bio-One Cellcoat®). Twenty-four hours prior to infection, fendiline was  
856 diluted in 0.5% DMSO and Vero E6 cell culture media at indicated concentrations and  
857 added to cells. An equivalent percentage of DMSO in culture media served as the vehicle  
858 control. Following pretreatment, compound was removed, and cells were incubated with  
859 Ebola virus (Kikwit) or Marburg virus (Ci67) at a multiplicity of infection (MOI) of 0.1 or 1.0  
860 in a BSL-4 located at USAMRIID. Following absorption for 1 hour, virus inoculum was  
861 removed and cells were washed. Plates were divided into three post-infection treatment  
862 groups (day 0, every day- e.d., every other day-e.o.d.), and received either culture media  
863 or freshly prepared fendiline or vehicle control. Cells were then treated daily with freshly  
864 prepared compound or left to incubate based on their designated treatment group. At 48  
865 hours (MOI=1.0), 72 or 96 hours (MOI=0.1) post infection, cells were washed with PBS  
866 and submerged in 10% neutral buffered formalin for 24 hours prior to removal from the  
867 BSL-4 laboratory. Formalin was removed and cells were washed with PBS. Cells were  
868 blocked with 3% BSA/PBS cell staining buffer (BioLegend) and incubated at 37°C for 2  
869 hours. Ebola virus GP-specific mAb KZ52 or Marburg virus GP-specific mAb 9G4, diluted

## Targeting PS levels to inhibit EBOV

870 in 3% BSA/PBS, were added to appropriate wells containing infected cells and incubated  
871 at room temperature for 2 hours. Cells were washed three times with PBS prior to addition  
872 of goat anti-human or goat anti-mouse IgG-Alexa-488 secondary antibody. Following 1-  
873 hour incubation with secondary antibody, cells were washed 3 times prior to  
874 counterstaining with Hoechst's stain diluted in PBS. Cells were imaged and percent of  
875 virus infected cells calculated using the Operetta High Content Imaging System and  
876 Harmony® High Content Imaging and Analysis Software (PerkinElmer).

877

### 878 **VLP collections & functional budding assays**

879 HEK293 cells were transfected and treated with fendiline as described in the  
880 previous section, *Cell Culture, Transfection & Pharmacological Treatments*. Budding  
881 assays were performed as described previously.[39,72] In brief, VLP containing  
882 supernatants were harvested from cells and clarified through low speed centrifugation.  
883 Clarified VLPs were loaded onto a 20% sucrose cushion in STE buffer (10 mM TRIS, 100  
884 mM NaCl, 1 mM EDTA, pH 7.6), isolated through ultracentrifugation, and resuspended in  
885 either 150 mM ammonium bicarbonate (functional budding assays), 2.5% glutaraldehyde  
886 in 0.1 M cacodylate buffer (TEM experiments), STE buffer (entry assays) or 0.1 M  
887 phosphate buffer for CD and thermal melting (PB; 0.02 M sodium phosphate monobasic,  
888 0.08 M sodium phosphate dibasic, pH 7.4). VLP samples were stored at -80°C for  
889 functional budding assays, -20°C for entry assays or 4°C for TEM and CD analysis.

890 For functional budding assays, cell lysate samples were harvested and lysed on  
891 ice with RIPA buffer (150mM NaCl, 5mM EDTA pH=8, 50mM Tris pH 7.4, 1% Triton-X,  
892 0.1% SDS, 0.5% deoxycholic acid) supplemented with Halts protease inhibitors. Prior to



## Targeting PS levels to inhibit EBOV

893 separation on a 12% SDS-PAGE gel, cell lysate and VLP sample volume loading were  
894 normalized to sample protein content, determined by a BCA assay. Gels were transferred  
895 to a nitrocellulose membrane and immunoblotted was performed as described previously  
896 in the section, *Immunoblotting*. Following ECL detection, VP40 cell lysate (VP40<sub>CL</sub>)  
897 expression was normalized to the respective GAPDH band density. The relative budding  
898 index was calculated according to the ratio of  $\text{density}_{\text{VLP}}/\text{density}_{\text{C+VLP}}$  (where  $\text{density}_{\text{VLP}}$  is  
899 the eVP40 VLP band density and  $\text{density}_{\text{C+VLP}}$  is the eVP40 cell lysate + VLP band  
900 density).

901

### 902 **Scanning electron microscopy**

903 HEK293 cells were transfected with FLAG-eVP40 and treated as described in the  
904 previous section, *Cell Culture, Transfections & Pharmacological Treatments*. Cells were  
905 scraped and collected through low-speed centrifugation at 48 hours post transfection, and  
906 stored in primary fixative (2% glutaraldehyde, 2% paraformaldehyde in 0.1 M cacodylate  
907 buffer, pH 7.35) at 4°C until processing. During processing, samples were fixed to  
908 coverslips and post-stained with 1% osmium tetroxide in 0.1 M cacodylate buffer.  
909 Samples were extensively rinsed with water and dehydrated with a graded series of  
910 ethanol followed by drying in a Tousimis 931 Supercritical Autosamdri® device. Prior to  
911 imaging, samples were coated with 3 nm Iridium. A Field Emission Scanning Electron  
912 Microscope Magellan 400 (FEI) (Hillsboro, OR) was used to collect images, with  
913 assistance from Tatyana Orlova at the Notre Dame Integrated Imaging Facility.

914

### 915 **Transmission electron microscopy imaging**

## Targeting PS levels to inhibit EBOV

916 VLPs were purified as previous described in *VLP Collections & Functional Budding*  
917 *Assays*. Following ultracentrifugation, VLPs were resuspended in fixative (2.5%  
918 glutaraldehyde in 0.1 M cacodylate buffer). Purified VLPs were applied onto glow  
919 discharged carbon formvar grids and negatively stained using 4% uranyl acetate.  
920 Samples were imaged with a FEI Tecnai T12 electron microscope equipped with a  
921 tungsten source and operating at 80 kV. VLP length and diameter measurements were  
922 quantified using ImageJ software. For diameter analysis, eight different diameters were  
923 measured across random areas on each VLP, and the mean diameter was reported.

924

### 925 **Circular dichroism**

926 VLPs were produced in the presence of DMSO or fendiline and purified as  
927 previously described in the *VLP collections* section. PB buffer was added to a 10-mm  
928 path-length Spectrosil Far UV Quartz cuvette (Starna Cells CatID: 21-Q-10) and a  
929 background spectra was collected and autosubtracted from VLP samples. VLP samples  
930 were loaded into the 10-mm cuvette diluted in PB buffer to an approximate final protein  
931 concentration of 30  $\mu\text{g}/\text{mL}$ . Circular dichroism spectra of VLP samples were collected  
932 between 200-280 nm at a 0.2 nm step size with 0.5s time-per-point (with adaptive  
933 sampling) using a Chirascan spectrometer (Applied Photophysics, Leatherhead, UK).  
934 Absorbance spectra (Abs) and detector signal (hv) were collected simultaneously as  
935 controls. After collecting the CD spectra, a microstir bar was added to the cuvette and  
936 thermal melting was run from 20°C-93°C using a 0.5°C step ramping at 1.00°C/minute  
937 with a tolerance of 0.20°C; simultaneously, spectra were collected at a single wavelength  
938 of 220 nm with a time-per-point of 24 seconds. Absorbance spectra (Abs) and detector

## Targeting PS levels to inhibit EBOV

939 signal (hv) were collected simultaneously as controls. At the end of thermal melting  
940 measurement collection, temperature set-points were replaced with temperatures  
941 measured by the sample handling unit. Data was converted from Chirascan filetype to  
942 CSV and then extracted into GraphPad PRISM 7. Using the first derivative of the circular  
943 dichroism spectral signal in respect to temperature, the maxima was taken as the melting  
944 point of the sample. Melting temperatures of the three replicates were averaged for the  
945 reported  $T_m$ .

946

### 947 **Dil entry assay**

948 **VLP labeling.** VLPs produced from HEK293 cells expressing FLAG-eVP40 and eGP  
949 were purified as previously described in the *Functional Budding Assays* section. Dil entry  
950 assays were performed as described previously.[58,73] In brief, following ultra-  
951 centrifugation VLPs were resuspended in STE buffer and further purified by filtering  
952 through a 0.22  $\mu\text{m}$  filter. Protein content of VLP samples were normalized to 0.1  $\mu\text{g}/\text{mL}$   
953 using STE buffer. VLPs were labeled with Dil for 1 hr at RT with gentle agitation (final Dil  
954 = 0.06  $\mu\text{M}$ ). Following incubation, labeled VLP samples were concentrated down to equal  
955 volumes, and brought up to volume in phenol-free MEM with 2% FBS and 4% BSA.

956

957 **TIM-1 dependent entry.** HEK293 cells were transfected with TIM-1 for 24 hours prior to  
958 incubation with Dil-labeled VLPs and briefly rinsed with phenol-free MEM with 2% FBS  
959 and 4%BSA. Dil-VLPs were added to TIM-1 expressing HEK293 cells, spinoculated for  
960 45 min at 4°C, and allowed to incubate for 1 hr at 37°C. Plates were then rinsed with PBS,  
961 fixed with 4% paraformaldehyde in PBS, their nuclei stained with Hoechst 3342, and

962 stored at 4°C until imaging. During image acquisition, z-stacks were acquired of 10-15  
963 frames (1 µm steps).

964

### 965 **Toxicity analysis**

966 HEK293 and Vero E6 cell toxicity following fendiline treatment was tested at the  
967 indicated time points using the Cell Titer Glo Viability Assay (Promega, Madison WI)  
968 according to the manufacturer's protocol. In brief, HEK293 cells were treated with the  
969 indicated concentration of fendiline or control for 24 or 48 hours. Vero E6 cells were  
970 treated for 24 hours, the drug was removed and the cells were replenished with Vero E6  
971 culture media, to mirror the corresponding ebolavirus and Marburgvirus infections at BSL-  
972 4. Following the one-hour mock infection, cells were washed with PBS and plates were  
973 divided into three treatment groups (day 0, e.d., e.o.d.), and cells received either culture  
974 media or freshly prepared fendiline or vehicle control and were then treated daily with  
975 freshly prepared compound or left to incubate based on their designated treatment group.  
976 At 48, 72, and 96 hours following mock infection, and mirroring the post infection fixation  
977 time points, CellTiter-Glo® reagent was added to each well in accordance with the  
978 manufacturer's instructions. Both HEK293 and Vero E6 toxicity assays luminescence  
979 readings were recorded using a SpectraMax® M5 (Molecular Devices®) plate reader.

980

### 981 **Mathematical model of *in vitro* experiments**

982 We implemented a system of ordinary differential equations (ODEs) to describe  
983 the dynamics of host target cells, infected cells and free virus in different combinations

## Targeting PS levels to inhibit EBOV

984 reflecting the *in vitro* experimental systems used here. These equations are similar to  
985 those used to simulate Ebola virus dynamics in earlier work [74,75].

986

$$987 \quad \frac{dT}{dt} = -\beta TV \quad (1)$$

$$988 \quad \frac{dI}{dt} = \beta TV - \delta I \quad (2)$$

$$989 \quad \frac{dV}{dt} = pI - cV \quad (3)$$

990

991 Where  $T$ ,  $I$  and  $V$  represent numbers of susceptible target host cells, infected cells and  
992 free virions respectively and parameters are described in Table 2.

993 We modified appropriate parameters in equations 1-3 to represent the following  
994 experimental systems during calibration of the mathematical model:

- 995 • Viral budding assay (set  $\beta=0$ ,  $T(0) = 0$ ,  $I(0) = 2.625 \times 10^6$ ,  $V(0) = 0$ , vary  $\delta$ ,  $c$ ,  $p$ )
- 996 • Viral entry assay (set  $p=0$ ,  $T(0) = 6.3 \times 10^5$ ,  $I(0) = 0$ ,  $V(0) = 6.3 \times 10^3$ , vary  $\beta$ ,  $\delta$ ,  $c$ )
- 997 • BSL-4 Cellular infection assay (BSL4) ( $T(0) = 5 \times 10^4$ ,  $I(0) = 0$ ,  $V(0) = 5 \times 10^4$  (MOI 1)  
998 or  $V(0) = 5 \times 10^3$  (MOI 0.1) , vary  $\beta$ ,  $\delta$ ,  $c$ ,  $p$ )

999

1000 Fendiline treatment effects are simulated using  $E_{max}$  dose response curves:

$$1001 \quad f_X = E_{max} \frac{C^H}{C_{50}^H + C^H}$$

1002

1003 Where  $C$ : concentration of fendiline,  $E_{max}$ : maximum effect of fendiline,  $H$ : hill constant  
1004 for the dose response curve, and  $C_{50}$  concentration with 50% of  $E_{max}$  efficacy.  $E_{max}$ ,  $C_{50}$

## Targeting PS levels to inhibit EBOV

1005 and  $H$  are fitted separately for fendiline effects on budding ( $f_{budding}$ ) or entry ( $f_{entry}$ ).

1006 Fendiline

1007 efficacy ( $f_x$ ) is defined as a fraction where  $f_x=0$  implies no effect and  $f_x=1$  implies 100%  
1008 inhibition of  $X$  ( $X = budding$  or  $entry$ ). Fendiline effects are integrated into equations (1-3)  
1009 by multiplying  $\beta$  by  $(1-f_{entry})$  and multiplying  $p$  by  $(1-f_{budding})$ . Fendiline concentrations are  
1010 assumed to be constant over the observation periods based on low *in vitro* degradation  
1011 rates of the drug. Daily treatment in the BSL-4 assays (e.d.) are simulated by removing  
1012 all free virus particles from the equations at each dosing time.

1013

1014 We calibrated the model in two stages. First, we calibrated to the budding and  
1015 entry assays. The uncoupling of budding and entry in this data allows us to define  
1016 biologically feasible ranges for the effects of fendiline on budding and entry separately.  
1017 Using these feasible ranges, we proceed to calibrate the full model to the BSL-4 data  
1018 (day-1/0 and e.d.). Therefore, we allow the budding and entry assays to inform the BSL-  
1019 4 simulations without imposing strict assumptions about the equivalency between the two  
1020 systems. In this way we progressively build complexity into the model accounting for  
1021 fendiline effects on viral budding, entry, and infection progression.

1022

1023 Calibrating to budding and entry assays we restrict the value of  $p$  to be larger than  
1024 1 and  $c$  to be between 0 and 5. These assumptions are in line with previous estimates,  
1025 and are necessary to qualitatively reproduce viral production observed, but not quantified,  
1026 in the budding assays. Parameters are estimated using Matlab's non-linear least squares

1027 optimization algorithm. Parameter bounds and final values are defined in Supplementary  
1028 Information Table 2.

1029

### 1030 **Statistical testing**

1031 All experiments were done in triplicate (unless otherwise noted). For analysis of  
1032 eVLP diameter and length from TEM experiments, as well as total PA levels between  
1033 control and 5  $\mu$ M fendiline treated cells, a two-tailed t-test was performed. For all  
1034 experiments which contained >2 experimental groups, a one-way ANOVA with Dunnett's  
1035 multiple comparisons was performed on raw data. Lastly, for N&B analysis, a two-way  
1036 ANOVA with Dunnett's multiple comparisons was performed.

1037

### 1038 **Acknowledgements**

1039 These studies were supported by the NIH (AI081077) to R.V.S and the Indiana CTSI to  
1040 E.P. and R.V.S.. M.L.H. was partially supported by a NIH T32 fellowship (T32  
1041 GM075762). We are grateful for lipidomic analysis by Avanti Polar Lipids, Inc., and for  
1042 research support by Dr. Nathan Dissinger. The authors acknowledge the use of the  
1043 facilities of the Bindley Bioscience Center, a core facility of the NIH-funded Indiana  
1044 Clinical and Translational Sciences institute and the use of the Purdue Life Science  
1045 Electron Microscopy facility.

1046

### 1047 **Author Contributions**

1048 M.L.H. and R.V.S conceived of and designed the study. M.H., S.A., E.D., and C.P.  
1049 performed experiments and analyzed the data. L.P. designed the BSL-4 experiments and  
1050 L.P. and K.E.H. performed and analyzed the BSL-4 experiments. J.M.B. and J.D. oversaw

## Targeting PS levels to inhibit EBOV

1051 the BSL-4 work. E.P. designed and performed the mathematical modeling and analysis.

1052 M.L.H. and R.V.S. wrote the manuscript with input from all authors.

1053

### 1054 **Conflict of Interest**

1055 The authors declare no conflict of interest.



1056 **References**

- 1057 1. Breman JG, Heymann DL, Lloyd G, McCormick JB, Miatudila M, Murphy FA, et al.  
1058 Discovery and Description of Ebola Zaire Virus in 1976 and Relevance to the West  
1059 African Epidemic during 2013-2016. *J Infect Dis.* 2016;214: S93–S101.  
1060 doi:10.1093/infdis/jiw207
- 1061 2. Liu L. *Fields Virology*, 6th Edition. *Clin Infect Dis.* 2014;59: 613–613.  
1062 doi:10.1093/cid/ciu346
- 1063 3. FDA. First FDA-approved vaccine for the prevention of Ebola virus disease,  
1064 marking a critical milestone in public health preparedness and response | FDA.  
1065 2019 [cited 9 Jan 2020]. Available: [https://www.fda.gov/news-events/press-](https://www.fda.gov/news-events/press-announcements/first-fda-approved-vaccine-prevention-ebola-virus-disease-marking-critical-milestone-public-health)  
1066 [announcements/first-fda-approved-vaccine-prevention-ebola-virus-disease-](https://www.fda.gov/news-events/press-announcements/first-fda-approved-vaccine-prevention-ebola-virus-disease-marking-critical-milestone-public-health)  
1067 [marking-critical-milestone-public-health](https://www.fda.gov/news-events/press-announcements/first-fda-approved-vaccine-prevention-ebola-virus-disease-marking-critical-milestone-public-health)
- 1068 4. Banadyga L, Dolan MA, Ebihara H. *Rodent-Adapted Filoviruses and the Molecular*  
1069 *Basis of Pathogenesis.* *Journal of Molecular Biology Academic Press*; Aug 28, 2016  
1070 pp. 3449–3466. doi:10.1016/j.jmb.2016.05.008
- 1071 5. Mühlberger E. Filovirus replication and transcription. *Future Virol.* 2007;2: 205–215.  
1072 doi:10.2217/17460794.2.2.205
- 1073 6. Jasenosky LD, Neumann G, Lukashevich I, Kawaoka Y. Ebola virus VP40-induced  
1074 particle formation and association with the lipid bilayer. *J Virol.* 2001;75: 5205–14.  
1075 doi:10.1128/JVI.75.11.5205-5214.2001
- 1076 7. Noda T, Sagara H, Suzuki E, Takada A, Kida H, Kawaoka Y. Ebola Virus VP40  
1077 Drives the Formation of Virus-Like Filamentous Particles Along with GP. *J Virol.*  
1078 2002;76: 4855–4865. doi:10.1128/jvi.76.10.4855-4865.2002
- 1079 8. Licata JM, Simpson-Holley M, Wright NT, Han Z, Paragas J, Harty RN. Overlapping  
1080 Motifs (PTAP and PPEY) within the Ebola Virus VP40 Protein Function  
1081 Independently as Late Budding Domains: Involvement of Host Proteins TSG101  
1082 and VPS-4. *J Virol.* 2003;77: 1812–1819. doi:10.1128/jvi.77.3.1812-1819.2003
- 1083 9. Wang YE, Park A, Lake M, Pentecost M, Torres B, Yun TE, et al. Ubiquitin-  
1084 regulated nuclear-cytoplasmic trafficking of the Nipah virus matrix protein is  
1085 important for viral budding. *PLoS Pathog.* 2010;6: e1001186.  
1086 doi:10.1371/journal.ppat.1001186
- 1087 10. Oda S-I, Noda T, Wijesinghe KJ, Halfmann P, Bornholdt ZA, Abelson DM, et al.  
1088 Crystal Structure of Marburg Virus VP40 Reveals a Broad, Basic Patch for Matrix  
1089 Assembly and a Requirement of the N-Terminal Domain for Immunosuppression.  
1090 *J Virol.* 2016;90: 1839–48. doi:10.1128/JVI.01597-15
- 1091 11. Bornholdt ZA, Noda T, Abelson DM, Halfmann P, Wood MR, Kawaoka Y, et al.  
1092 Structural rearrangement of ebola virus vp40 begets multiple functions in the virus  
1093 life cycle. *Cell.* 2013;154: 763–774. doi:10.1016/j.cell.2013.07.015
- 1094 12. Panchal RG, Ruthel G, Kenny TA, Kallstrom GH, Lane D, Badie SS, et al. In vivo  
1095 oligomerization and raft localization of Ebola virus protein VP40 during vesicular  
1096 budding. *Proc Natl Acad Sci U S A.* 2003;100: 15936–41.  
1097 doi:10.1073/pnas.2533915100
- 1098 13. Jasenosky LD, Kawaoka Y. Filovirus budding. *Virus Res.* 2004;106: 181–8.  
1099 doi:10.1016/j.virusres.2004.08.014
- 1100 14. Adu-Gyamfi E, Johnson KA, Fraser ME, Scott JL, Soni SP, Jones KR, et al. Host  
1101 Cell Plasma Membrane Phosphatidylserine Regulates the Assembly and Budding

Targeting PS levels to inhibit EBOV

- 1102 of Ebola Virus. *J Virol.* 2015;89: 9440–53. doi:10.1128/JVI.01087-15
- 1103 15. Bobone S, Hilsch M, Storm J, Dunsing V, Herrmann A, Chiantia S.  
1104 Phosphatidylserine Lateral Organization Influences the Interaction of Influenza  
1105 Virus Matrix Protein 1 with Lipid Membranes. *J Virol.* 2017;91: 1–15.  
1106 doi:10.1128/jvi.00267-17
- 1107 16. Wijesinghe KJ, Stahelin V. Investigation of the Lipid Binding Properties of the  
1108 Marburg Virus. *J Virol.* 2016;90: 3074–3085. doi:10.1128/JVI.02607-15.Editor
- 1109 17. Carnec X, Meertens L, Dejarnac O, Perera-Lecoin M, Hafirassou ML, Kitaura J, et  
1110 al. The Phosphatidylserine and Phosphatidylethanolamine Receptor CD300a Binds  
1111 Dengue Virus and Enhances Infection. *J Virol.* 2016;90: 92–102.  
1112 doi:10.1128/JVI.01849-15
- 1113 18. Moller-Tank S, Kondratowicz AS, Davey RA, Rennert PD, Maury W. Role of the  
1114 phosphatidylserine receptor TIM-1 in enveloped-virus entry. *J Virol.* 2013;87: 8327–  
1115 41. doi:10.1128/JVI.01025-13
- 1116 19. Jemielity S, Wang JJ, Chan YK, Ahmed AA, Li W, Monahan S, et al. TIM-family  
1117 Proteins Promote Infection of Multiple Enveloped Viruses through Virion-associated  
1118 Phosphatidylserine. *PLoS Pathog.* 2013;9: e1003232.  
1119 doi:10.1371/journal.ppat.1003232
- 1120 20. Nanbo A, Kawaoka Y. Molecular Mechanism of Externalization of  
1121 Phosphatidylserine on the Surface of Ebola Virus Particles. *DNA Cell Biol.* 2019;38:  
1122 115–120. doi:10.1089/dna.2018.4485
- 1123 21. Amara A, Mercer J. Viral apoptotic mimicry. *Nat Rev Microbiol.* 2015;13: 461–9.  
1124 doi:10.1038/nrmicro3469
- 1125 22. Brunton B, Rogers K, Phillips EK, Brouillette RB, Bouls R, Butler NS, et al. TIM-1  
1126 serves as a receptor for Ebola virus in vivo, enhancing viremia and pathogenesis.  
1127 *PLoS Negl Trop Dis.* 2019;13: e0006983. doi:10.1371/journal.pntd.0006983
- 1128 23. Kondratowicz AS, Lennemann NJ, Sinn PL, Davey RA, Hunt CL, Moller-Tank S, et  
1129 al. T-cell immunoglobulin and mucin domain 1 (TIM-1) is a receptor for Zaire  
1130 Ebolavirus and Lake Victoria Marburgvirus. *Proc Natl Acad Sci U S A.* 2011;108:  
1131 8426–31. doi:10.1073/pnas.1019030108
- 1132 24. Van Meer G, Voelker DR, Feigenson GW. Membrane lipids: Where they are and  
1133 how they behave. *Nature Reviews Molecular Cell Biology.* 2008. pp. 112–124.  
1134 doi:10.1038/nrm2330
- 1135 25. Bell RM, Ballas LM, Coleman RA. Lipid topogenesis. *J Lipid Res.* 1981;22: 391–  
1136 403.
- 1137 26. Jeckel D, Karrenbauer A, Burger KNJ, Van Meer G, Wieland F. Glucosylceramide  
1138 is synthesized at the cytosolic surface of various Golgi subfractions. *J Cell Biol.*  
1139 1992;117: 259–267. doi:10.1083/jcb.117.2.259
- 1140 27. Hiramata T, Das R, Yang Y, Ferguson C, Won A, Yip CM, et al. Phosphatidylserine  
1141 dictates the assembly and dynamics of caveolae in the plasma membrane. *J Biol*  
1142 *Chem.* 2017;292: 14292–14307. doi:10.1074/jbc.M117.791400
- 1143 28. Fairn GD, Schieber NL, Ariotti N, Murphy S, Kuerschner L, Webb RI, et al. High-  
1144 resolution mapping reveals topologically distinct cellular pools of  
1145 phosphatidylserine. *J Cell Biol.* 2011;194: 257–275. doi:10.1083/jcb.201012028
- 1146 29. Soni SP, Stahelin R V. The Ebola virus matrix protein VP40 selectively induces  
1147 vesiculation from phosphatidylserine-enriched membranes. *J Biol Chem.* 2014;289:

Targeting PS levels to inhibit EBOV

- 1148 33590–7. doi:10.1074/jbc.M114.586396
- 1149 30. Stahelin R V. Membrane binding and bending in Ebola VP40 assembly and egress.  
1150 *Frontiers in Microbiology*. Frontiers Research Foundation; 2014. p. 300.  
1151 doi:10.3389/fmicb.2014.00300
- 1152 31. Del Vecchio K, Frick CT, Gc JB, Oda S-I, Gerstman BS, Sapphire EO, et al. A  
1153 cationic, C-terminal patch and structural rearrangements in Ebola virus matrix VP40  
1154 protein control its interactions with phosphatidylserine. *J Biol Chem*. 2018;293:  
1155 3335–3349. doi:10.1074/jbc.M117.816280
- 1156 32. Moller-Tank S, Maury W. Phosphatidylserine receptors: Enhancers of enveloped  
1157 virus entry and infection. *Virology*. Academic Press Inc.; 2014. pp. 565–580.  
1158 doi:10.1016/j.virol.2014.09.009
- 1159 33. Cho K-J, van der Hoeven D, Zhou Y, Maekawa M, Ma X, Chen W, et al. Inhibition  
1160 of Acid Sphingomyelinase Depletes Cellular Phosphatidylserine and Mislocalizes  
1161 K-Ras from the Plasma Membrane. *Mol Cell Biol*. 2016;36: 363–74.  
1162 doi:10.1128/MCB.00719-15
- 1163 34. van der Hoeven D, Cho K, Zhou Y, Ma X, Chen W, Naji A, et al. Sphingomyelin  
1164 Metabolism Is a Regulator of K-Ras Function. *Mol Cell Biol*. 2017;38: e00373-17.  
1165 doi:10.1128/mcb.00373-17
- 1166 35. van der Hoeven D, Cho K, Ma X, Chigurupati S, Parton RG, Hancock JF. Fendiline  
1167 inhibits K-Ras plasma membrane localization and blocks K-Ras signal  
1168 transmission. *Mol Cell Biol*. 2013;33: 237–51. doi:10.1128/MCB.00884-12
- 1169 36. Bayer R, Mannhold R. Fendiline: a review of its basic pharmacological and clinical  
1170 properties. *Pharmatherapeutica*. 1987;5: 103–36.
- 1171 37. Ruigrok RW, Schoehn G, Dessen A, Forest E, Volchkov V, Dolnik O, et al.  
1172 Structural characterization and membrane binding properties of the matrix protein  
1173 VP40 of Ebola virus. *J Mol Biol*. 2000;300: 103–12. doi:10.1006/jmbi.2000.3822
- 1174 38. Scianimanico S, Schoehn G, Timmins J, Ruigrok RH, Klenk HD, Weissenhorn W.  
1175 Membrane association induces a conformational change in the Ebola virus matrix  
1176 protein. *EMBO J*. 2000;19: 6732–41. doi:10.1093/emboj/19.24.6732
- 1177 39. Johnson KA, Taghon GJF, Scott JL, Stahelin R V. The Ebola Virus matrix protein,  
1178 VP40, requires phosphatidylinositol 4,5-bisphosphate (PI(4,5)P<sub>2</sub>) for extensive  
1179 oligomerization at the plasma membrane and viral egress. *Sci Rep*. 2016;6: 19125.  
1180 doi:10.1038/srep19125
- 1181 40. Johnson KA, Budicini MR, Urata S, Gerstman BS, Chapagain PP, Li S, et al.  
1182 PI(4,5)P<sub>2</sub> Binding Sites in the Ebola Virus Matrix Protein Modulate 2. *bioRxiv*.  
1183 2018; 341248. doi:10.1101/341248
- 1184 41. Lemke EA. Site-specific labeling of proteins for single-molecule fret measurements  
1185 using genetically encoded ketone functionalities. *Methods in Molecular Biology*.  
1186 Humana Press Inc.; 2011. pp. 3–15. doi:10.1007/978-1-61779-151-2\_1
- 1187 42. Kay JG, Koivusalo M, Ma X, Wohland T, Grinstein S. Phosphatidylserine dynamics  
1188 in cellular membranes. *Mol Biol Cell*. 2012;23: 2198–2212. doi:10.1091/mbc.E11-  
1189 11-0936
- 1190 43. Adu-Gyamfi E, Digman MA, Gratton E, Stahelin R V. Investigation of Ebola VP40  
1191 assembly and oligomerization in live cells using number and brightness analysis.  
1192 *Biophys J*. 2012;102: 2517–25. doi:10.1016/j.bpj.2012.04.022
- 1193 44. Hoenen T, Biedenkopf N, Zielecki F, Jung S, Groseth A, Feldmann H, et al.

- 1194 Oligomerization of Ebola virus VP40 is essential for particle morphogenesis and  
1195 regulation of viral transcription. *J Virol.* 2010;84: 7053–63. doi:10.1128/JVI.00737-  
1196 10
- 1197 45. Kerr D, Tietjen GT, Gong Z, Tajkhorshid E, Adams EJ, Lee KYC. Sensitivity of  
1198 peripheral membrane proteins to the membrane context: A case study of  
1199 phosphatidylserine and the TIM proteins. *Biochim Biophys Acta Biomembr.*  
1200 2018;1860: 2126–2133. doi:10.1016/j.bbamem.2018.06.010
- 1201 46. Stahelin R V. Lipid binding domains: More than simple lipid effectors. *Journal of*  
1202 *Lipid Research.* 2009. pp. S299-30. doi:10.1194/jlr.R800078-JLR200
- 1203 47. Stahelin R V, Scott JL, Frick CT. Cellular and molecular interactions of  
1204 phosphoinositides and peripheral proteins. *Chem Phys Lipids.* 2014;182: 3–18.  
1205 doi:10.1016/j.chemphyslip.2014.02.002
- 1206 48. Menke M, Gerke V, Steinem C. Phosphatidylserine membrane domain clustering  
1207 induced by annexin A2/S100A10 heterotetramer. *Biochemistry.* 2005;44: 15296–  
1208 15303. doi:10.1021/bi051585i
- 1209 49. Wen Y, Vogt VM, Feigenson GW. Multivalent Cation-Bridged PI(4,5)P2 Clusters  
1210 Form at Very Low Concentrations. *Biophys J.* 2018;114: 2630–2639.  
1211 doi:10.1016/j.bpj.2018.04.048
- 1212 50. Zhao H, Hakala M, Lappalainen P. ADF/cofilin binds phosphoinositides in a  
1213 multivalent manner to act as a PIP(2)-density sensor. *Biophys J.* 2010;98: 2327–  
1214 2336. doi:10.1016/j.bpj.2010.01.046
- 1215 51. Yeung T, Gilbert GE, Shi J, Silvius J, Kapus A, Grinstein S. Membrane  
1216 phosphatidylserine regulates surface charge and protein localization. *Science (80-)*  
1217 *).* 2008;319: 210–213. doi:10.1126/science.1152066
- 1218 52. Digman MA, Dalal R, Horwitz AF, Gratton E. Mapping the number of molecules and  
1219 brightness in the laser scanning microscope. *Biophys J.* 2008;94: 2320–2332.  
1220 doi:10.1529/biophysj.107.114645
- 1221 53. Moe JB, Lambert RD, Lupton HW. Plaque assay for Ebola virus. *J Clin Microbiol.*  
1222 1981;13: 791–3. Available: <http://www.ncbi.nlm.nih.gov/pubmed/7014628>
- 1223 54. Wang J, Qiao L, Hou Z, Luo G. TIM-1 Promotes Hepatitis C Virus Cell Attachment  
1224 and Infection. *J Virol.* 2017;91. doi:10.1128/jvi.01583-16
- 1225 55. Dejarnac O, Hafirassou ML, Chazal M, Versapuech M, Gaillard J, Perera-Lecoin  
1226 M, et al. TIM-1 Ubiquitination Mediates Dengue Virus Entry. *Cell Rep.* 2018;23:  
1227 1779–1793. doi:10.1016/j.celrep.2018.04.013
- 1228 56. Miller ME, Adhikary S, Kolokoltsov AA, Davey RA. Ebolavirus Requires Acid  
1229 Sphingomyelinase Activity and Plasma Membrane Sphingomyelin for Infection. *J*  
1230 *Virol.* 2012;86: 7473–7483. doi:10.1128/jvi.00136-12
- 1231 57. Nanbo A, Imai M, Watanabe S, Noda T, Takahashi K, Neumann G, et al. Ebolavirus  
1232 is internalized into host cells via macropinocytosis in a viral glycoprotein-dependent  
1233 manner. *PLoS Pathog.* 2010;6: e1001121. doi:10.1371/journal.ppat.1001121
- 1234 58. Kuroda M, Fujikura D, Nanbo A, Marzi A, Noyori O, Kajihara M, et al. Interaction  
1235 Between TIM-1 and NPC1 Is Important for Cellular Entry of Ebola Virus. *J Virol.*  
1236 2015;89: 6481–93. doi:10.1128/JVI.03156-14
- 1237 59. Younan P, Iampietro M, Santos RI, Ramanathan P, Popov VL, Bukreyev A.  
1238 Disruption of Phosphatidylserine Synthesis or Trafficking Reduces Infectivity of  
1239 Ebola Virus. *J Infect Dis.* 2018;218: S475–S485. doi:10.1093/infdis/jiy489

Targeting PS levels to inhibit EBOV

- 1240 60. Jasenosky LD, Cadena C, Mire CE, Borisevich V, Haridas V, Ranjbar S, et al. The  
1241 FDA-Approved Oral Drug Nitazoxanide Amplifies Host Antiviral Responses and  
1242 Inhibits Ebola Virus. *iScience*. 2019;19: 1279–1290. doi:10.1016/j.isci.2019.07.003  
1243 61. Dyall J, Nelson EA, DeWald LE, Guha R, Hart BJ, Zhou H, et al. Identification of  
1244 Combinations of Approved Drugs With Synergistic Activity Against Ebola Virus in  
1245 Cell Cultures. *J Infect Dis*. 2018;218: S672–S678. doi:10.1093/infdis/jiy304  
1246 62. Nelson EA, Barnes AB, Wiehle RD, Fontenot GK, Hoenen T, White JM.  
1247 Clomiphene and Its Isomers Block Ebola Virus Particle Entry and Infection with  
1248 Similar Potency: Potential Therapeutic Implications. *Viruses*. 2016;8: E206.  
1249 doi:10.3390/v8080206  
1250 63. Johansen LM, Brannan JM, Delos SE, Shoemaker CJ, Stossel A, Lear C, et al.  
1251 FDA-approved selective estrogen receptor modulators inhibit Ebola virus infection.  
1252 *Sci Transl Med*. 2013;5: 190ra79. doi:10.1126/scitranslmed.3005471  
1253 64. Johansen LM, DeWald LE, Shoemaker CJ, Hoffstrom BG, Lear-Rooney CM,  
1254 Stossel A, et al. A screen of approved drugs and molecular probes identifies  
1255 therapeutics with anti-Ebola virus activity. *Sci Transl Med*. 2015;7: 290ra89.  
1256 doi:10.1126/scitranslmed.aaa5597  
1257 65. Watt A, Moukambi F, Banadyga L, Groseth A, Callison J, Herwig A, et al. A Novel  
1258 Life Cycle Modeling System for Ebola Virus Shows a Genome Length-Dependent  
1259 Role of VP24 in Virus Infectivity. *J Virol*. 2014;88: 10511–10524.  
1260 doi:10.1128/jvi.01272-14  
1261 66. Darszon A, Vandenberg CA, Schönfeld M, Ellisman MH, Spitzer NC, Montal M.  
1262 Reassembly of protein-lipid complexes into large bilayer vesicles: perspectives for  
1263 membrane reconstitution. *Proc Natl Acad Sci U S A*. 1980;77: 239–243.  
1264 doi:10.1073/pnas.77.1.239  
1265 67. Reeves JP, Dowben RM. Formation and properties of thin-walled phospholipid  
1266 vesicles. *J Cell Physiol*. 1969;73: 49–60. doi:10.1002/jcp.1040730108  
1267 68. Yamashita Y, Oka M, Tanaka T, Yamazaki M. A new method for the preparation of  
1268 giant liposomes in high salt concentrations and growth of protein microcrystals in  
1269 them. *Biochim Biophys Acta*. 2002;1561: 129–34. doi:10.1016/s0005-  
1270 2736(02)00338-3  
1271 69. Bolte S, Cordelières FP. A guided tour into subcellular colocalization analysis in  
1272 light microscopy. *Journal of Microscopy*. Blackwell Publishing Ltd; 2006. pp. 213–  
1273 232. doi:10.1111/j.1365-2818.2006.01706.x  
1274 70. Tsai W-H. Moment-preserving thresholding: A new approach. *Comput Vision, Graph*  
1275 *Image Process*. 1985;29: 377–393. doi:10.1016/0734-189X(85)90133-1  
1276 71. Folch J, Lees M, Sloane Stanley GH. A simple method for the isolation and  
1277 purification of total lipides from animal tissues. *J Biol Chem*. 1957;226: 497–509.  
1278 doi:10.3989/scimar.2005.69n187  
1279 72. Harty RN. Hemorrhagic Fever Virus Budding Studies. In: Salvato MS, editor.  
1280 Hemorrhagic Fever Viruses: Methods and Protocols. New York, NY: Springer New  
1281 York; 2018. pp. 209–215. doi:10.1007/978-1-4939-6981-4\_15  
1282 73. Nanbo A, Maruyama J, Imai M, Ujie M, Fujioka Y, Nishide S, et al. Ebola virus  
1283 requires a host scramblase for externalization of phosphatidylserine on the surface  
1284 of viral particles. Geisbert T, editor. *PLOS Pathog*. 2018;14: e1006848.  
1285 doi:10.1371/journal.ppat.1006848

Targeting PS levels to inhibit EBOV

- 1286 74. Nguyen VK, Binder SC, Boianelli A, Meyer-Hermann M, Hernandez-Vargas EA.  
1287 Ebola virus infection modeling and identifiability problems . Frontiers in  
1288 Microbiology Frontiers Media S.A.; 2015 p. 257. doi:10.3389/fmicb.2015.00257  
1289 75. Martyushev A, Nakaoka S, Sato K, Noda T, Iwami S. Modelling Ebola virus  
1290 dynamics: Implications for therapy. Antiviral Res. 2016;135: 62–73.  
1291 doi:10.1016/j.antiviral.2016.10.004  
1292  
1293  
1294  
1295  
1296

## Figure Legends

### Figure 1

**Clustering of PS by eVP40 *in vitro* and in HEK 293 cells.** **a** Representative 3D reconstructed confocal images of immobilized GUVs (DPPC:Cholesterol:DPPS:PI(4,5)P<sub>2</sub>:TopFluor® TMR-PS(red)). Left panel: GUVs incubated without eVP40-Alexa488. Right three panels: GUVs incubated with 1.25 μM eVP40-Alexa488 (green). **b** Index of correlation (Mander's coefficient) between TopFluor® TMR-PS and eVP40-Alexa488 of different GUVs compositions incubated with 1.25 μM eVP40-Alexa488. Values are reported as mean ± s.d. A one-way ANOVA with multiple comparisons was performed; \*\*\*\*p<0.0001. **c** % TopFluor® TMR-PS quenching by eVP40 using GUVs (DPPC:Cholesterol:TopFluor®TMR-PS + increasing mol% of PS), 2.5% PI(4,5)P<sub>2</sub> was added to GUVs with 60% PS. Fluorescence spectra were recorded (Ex: 547 nm; Em: 550-600 nm); n=2. **d** Representative confocal images of HEK293 cells expressing various GFP-fused proteins (green) and supplemented with TopFluor® TMR-PS (red); scale bar= 10 μm. Yellow arrows indicate high intensity PS fluorescence regions **e** %PM with PS clusters = area of high intensity fluorescent PS clusters over total plasma membrane area from images in panel (d). Black bars are control proteins and blue bars are eVP40 proteins. Values are reported as mean ± s.d.; N>18, n=3; A one-way ANOVA was performed with multiple comparisons compared to the control GFP %PS clustering (\*\*\*p=0.0007, \*\*p=0.004). DPPC: dipalmitoyl-phosphatidylcholine; DPPS: dipalmitoyl-phosphatidylserine; GUVs: giant unilamellar vesicles; PS: phosphatidylserine; PM: plasma membrane.

## **Figure 2**

**Effect of PS concentration on eVP40 binding affinity to and oligomerization on membranes.** **a-c** SPR demonstrates that eVP40 affinity to LUVs increases in relation to PS concentration. **a** Representative normalized sensorgram of His<sub>6</sub>-eVP40 binding to LUVs containing 1% PS indicating an apparent affinity of 2.5  $\mu$ M. **b** Representative normalized sensorgram of His<sub>6</sub>-eVP40 binding to LUVs containing 11% PS indicating an apparent affinity of 0.65  $\mu$ M. **c** Representative normalized sensorgram of His<sub>6</sub>-eVP40 binding to LUVs containing 22% PS indicating an apparent affinity of 0.18  $\mu$ M. **d-e** PS concentration in LUVs enhances the ability of His<sub>6</sub>-eVP40 to oligomerize on membranes. **d** Representative western blot of chemical crosslinking performed on His<sub>6</sub>-WT-eVP40 following incubation with LUVs of varying PS content (detected by Mouse  $\alpha$ -His antibody & HRP-Sheep  $\alpha$ -Mouse). **e** Oligomerization capacity was determined from the western blot band density ratio of oligomers/(monomer + dimer) from chemical crosslinking experiments. A one-way ANOVA was performed with multiple comparisons compared to the control 0% PS LUVs control (30% PS \* $p$ = 0.021; 60% PS \* $p$ =0.017).  $n$ =3. Values are reported as mean  $\pm$  s.d.; SPR: surface plasmon resonance; LUVs: large unilamellar vesicles; PS: phosphatidylserine; HRP: horseradish peroxidase.

## **Figure 3**

**PS concentration, localization, and dynamics in fendiline treated HEK293 cells.** **a** Lipidomic analysis (LC/MS/MS) of total lipids extracted from HEK293 cells treated with the indicated concentration of fendiline (48 hours) demonstrated a significant reduction of total cellular PS levels. Values are normalized to DMSO control and are reported as mean



## Targeting PS levels to inhibit EBOV

$\pm$  s.d.; n=3; A one-way ANOVA was performed with multiple comparisons to the control DMSO (\*p=0.0120, \*\*\*p=0.0003). **b-c** Analysis of PS plasma membrane localization in response to fendiline treatment in HEK293 cells. **b** Representative confocal images from live cell imaging of HEK293 cells expressing GFP-LactC2 and treated with fendiline for 48 hours; scale bars= 10  $\mu$ m. **c** Effect of fendiline on PS plasma membrane localization was calculated by the ratio of GFP fluorescence at the plasma membrane intensity/intracellular intensity. Values are normalized to DMSO control and are reported as mean  $\pm$  s.d.; N>15, n=3; A one-way ANOVA was performed with multiple comparisons compared to the DMSO control (\*\*p=0.0031) **d-e** Analysis of PS clustering in HEK293 cells in response to fendiline treatment through N&B analysis. **d** *Left panel:* Representative images from time-lapse (30 frames) imaging of HEK293 expressing GFP-LactC2 and treated with fendiline for 48 hours; scale bar= 5  $\mu$ m. *Middle panel:* Brightness and Intensity plots for each representative image. *Right panel:* Selection map correlating each pixel in the representative image to an oligomerization state (b value) (red: monomer-5mer, green: 5mer-10mer, blue: >10mer). **e** Average % pixels quantification from panel (d)= Percentage of GFP-LactC2 with brightness values corresponding to monomer-5mer (~1.-1.5), 5mer-10mer (~1.5-1.9) and >10mer (>1.9) over the total pixels within each image. Values are reported as mean  $\pm$  s.d.; N $\geq$ 9, n=3; A two-way ANOVA was performed with Dunnett's multiple comparisons compared to the control DMSO % average pixels (\*\*\*\*p<0.0001, \*\*p=0.0043). GFP-LactC2: phosphatidylserine sensor; N&B: Number & Brightness analysis; PM: plasma membrane; PS: phosphatidylserine.

### **Figure 4**

## Targeting PS levels to inhibit EBOV

### **Evaluation of fendiline efficacy in the inhibition of authentic EBOV and MARV**

**spread. a-d** Effect of fendiline on EBOV infection. **a** Representative confocal images of Vero E6 cells infected with EBOV (Kikwit) at the indicated MOI and treated with the indicated concentration of fendiline. Cells were pretreated 24 hours prior to infection with the indicated concentration of fendiline. Post infection, cells were treated 1 hour later (d - 1/0), treated every day (e.d), or treated every other day (e.o.d) and fixed at either 48 hours, 72 hours or 96 hours post infection. (green=EBOV; blue= nuclei). White numbering in top right corner indicates %infection **b-d** Quantification of % inhibition of EBOV by fendiline. **b** 48 hours (MOI 1.0) **c** 72 hours (MOI 0.1) **d** 96 hours (MOI 0.1). Values are reported as mean  $\pm$  s.d. A one-way ANOVA was performed with multiple comparisons was performed. n=3. **e-h** Effect of fendiline on MARV infection. **e** Representative confocal images of Vero E6 cells infected with MARV (Ci67) at the indicated MOI and treated with the indicated concentration of fendiline. Cells were pretreated 24 hours prior to infection with the indicated concentration of fendiline. Post infection, cells were treated 1 hour later (d -1/0), treated every day (e.d), or treated every other day (e.o.d) and fixed at either 48 hours, 72 hours or 96 hours post infection. (green=MARV; blue= nuclei). White numbering in top right corner indicates %infection. **f-h** Quantification of % inhibition of MARV by fendiline. **f** 48 hours (MOI 1.0) **g** 72 hours (MOI 0.1) **h** 96 hours (MOI 0.1). Values are reported as mean  $\pm$  s.d. A one-way ANOVA was performed with multiple comparisons was performed. n=3. EBOV: Ebola virus; MOI: multiplicity of infection; MARV: Marburg virus; d. -1/0: treatment 1 hour after infection; e.d.: treatment every day; e.o.d.: treatment every other day.

## **Figure 5**

**Analysis of eVP40/mVP40 cellular localization and oligomerization following fendiline treatment. a-c** Effect of fendiline on eVP40 and mVP40 PM localization in HEK293 cells after 48 hours of treatment. **a** Representative confocal images from live cell imaging experiments of HEK293 cells expressing EGFP-WT-eVP40 (top panel) and EGFP-WT-mVP40 (bottom panel) after 48 hours of fendiline treatment. scale bars= 10  $\mu$ m. Effect of fendiline on eVP40 (**b**) and mVP40 (**c**) PM localization was quantified by the ratio of EGFP fluorescence intensity at the PM / total EGFP fluorescence intensity (and normalized to DMSO control). N>15, n=3. Values are reported as mean  $\pm$  s.d. A one-way ANOVA with multiple comparisons was performed compared to the DMSO control. **d-e** Analysis of eVP40 oligomerization in HEK293 cells in response to 48 hour fendiline treatment using N&B analysis. **d Left panel:** Representative images from time-lapse (30 frames) of HEK293 expressing EGFP-WT-eVP40 and treated with fendiline for 48 hours. scale bar = 5  $\mu$ m. **Middle panel:** Brightness and Intensity plots for each representative image. **Right panel:** Selection map correlating each pixel in the representative image to an oligomerization state (b value) (red: monomer-hexamer, green: hexamer-12mer, blue: 12mer-24mer, pink: >24mer). **e** Average % pixel quantification from panel (d)= % of GFP-WT-eVP40 with brightness values corresponding to monomer-hexamer (~1.-1.6), hexamer-12mer (~1.6-2.0), 12mer-24mer (2.0-3.2) and >24mer (>3.2) over the total pixels within each image. Values are reported as mean  $\pm$  s.d.; N $\geq$ 9, n=3; A two-way ANOVA was performed with Dunnett's multiple comparisons compared to the control DMSO % average pixels (\*\*p=0.0035). PM: plasma membrane; N&B: Number & Brightness analysis.

## **Figure 6**

### **VLP production and morphology in HEK293 cells in the presence of fendiline. a-d**

Functional budding assays assessed at 24 hours (a-b) and 48 hours (c-d) post treatment.

**a** Representative western blot of budding assays performed at 24 hours. VLP samples (top panel) and cell lysate samples (bottom panel) collected from HEK293 cells and immunoblotted for eVP40 expression; GAPDH served as a loading control. eVP40 detected by (Rabbit  $\alpha$ -eVP40 and HRP-Goat  $\alpha$ -Rabbit); GAPDH detected by mouse  $\alpha$ -GAPDH and HRP-Sheep  $\alpha$ -Mouse) **b** Quantification of relative budding index at 24 hours post fendiline treatment. Relative budding index was determined by the western blot band density of eVP40 in the VLP fraction/(total eVP40 cell lysate + eVP40 VLP band density) and was normalized to the DMSO control. Cell lysate eVP40 band density was normalized to GAPDH band density prior to use in budding index quantification. n=3. Values are reported as mean  $\pm$  s.d. A one-way ANOVA was performed with multiple comparisons compared to the DMSO control. **c** Representative western blot of budding assays performed at 48 hours. VLP samples (top panel) and cell lysate samples (bottom panel) collected from HEK293 cells and immunoblotted for eVP40 expression; GAPDH served as a loading control. eVP40 detected by (Rabbit  $\alpha$ -eVP40 and HRP-Goat  $\alpha$ -Rabbit); GAPDH detected by (Mouse  $\alpha$ -GAPDH and HRP-Sheep  $\alpha$ -Mouse) **b** Quantification of relative budding index at 48 hours post fendiline treatment. Relative budding index was determined by the western blot band density of eVP40 in the VLP fraction/(total eVP40 cell lysate + eVP40 VLP band density) and was normalized to the DMSO control. Cell lysate eVP40 band density was normalized to GAPDH band density prior to use in

## Targeting PS levels to inhibit EBOV

budding index quantification.  $n=3$ . Values are reported as mean  $\pm$  s.d. A one-way ANOVA was performed with multiple comparisons compared to the DMSO control. (\* $p=0.0260$ ) **e-f** SEM micrographs of HEK93 cells. **e** Representative micrographs of mock transfected HEK293 cells harvested after 48 hours of no treatment or DMSO treatment. **f** Representative micrographs of HEK293 cells expressing FLAG-eVP40 and harvested after 48 hours of no treatment, DMSO treatment, or the indicated concentration of fendiline. VLPs: virus like particles; SEM: scanning electron microscopy; GAPDH: glyceraldehyde 3-phosphate dehydrogenase; HRP: horseradish peroxidase.

### **Figure 7**

**Effect of fendiline on eVLP morphology and TIM-1 dependent eVLP entry. a-c** TEM analysis of eVLP morphology. **a** Representative transmission electron micrographs of eVLPs purified from HEK293 cells expressing FLAG-eVP40 and eGP following 48 hours of DMSO (left panel) or 5  $\mu$ M fendiline treatment (right panel). **b** Quantification of eVLP length ( $\mu$ m) of DMSO-derived eVLPs (black) and fendiline-derived eVLPs (blue).  $N>50$ ,  $n=3$ . Values are reported as mean  $\pm$  s.d. A two-tailed t-test was performed (\*\* $p=0.0139$ ). **c** Quantification of eVLP diameter (nm) of DMSO-derived eVLPs (black) and fendiline-derived eVLPs (blue).  $N>50$ ,  $n=3$ . Values are reported as mean  $\pm$  s.d. A two-tailed t-test was performed (\* $p=0.0430$ ). **d-e** Fluorescence based Dil TIM-1 dependent entry assay. **d** Representative confocal images from the Dil-entry assay comparing entry of eVLPs produced from DMSO (top panel) and fendiline-treated HEK293 cells (bottom panel) into target cells (HEK293 cells transiently expressing increasing amounts of TIM-1; 0.0  $\mu$ g, 0.5  $\mu$ g, 1.0  $\mu$ g). A stack of 10 frames was acquired for each image. Dil (initially red) was

## Targeting PS levels to inhibit EBOV

recolored to yellow for easier observation in print; blue (Hoechst 3342 stain); scale bar = 10  $\mu\text{m}$ . **e** Quantification of eVLP entry was performed by calculating the total number of Dil punctate / the total number of Dil-positive cells. Three images from each z-stack was quantified. N=9, n=3. Values are reported as mean  $\pm$  s.d. A one-way ANOVA was performed with multiple comparisons against the 0.0  $\mu\text{g}$  TIM-1 condition for both DMSO- and fendiline derived eVLPs.(\*\*\*\*p<0.0001; \*\*p=0.0093). eVLP: entry-competent viral like particles; TEM: transmission electron microscopy; TIM-1: t-cell immunoglobulin receptor-1; eVLPs: entry-competent VLPs; eGP: Ebola glycoprotein; Dil: 1,1'-Dioctadecyl-3,3,3',3'-Tetramethylindocarbocyanine Perchlorate.

### **Figure 8**

**Calibrated mathematical model reproduces key observations in multiple experimental datasets.** Percentage infected cells is shown for various fendiline concentrations given prior to infection (d-1/0, **a-c**) or daily (e.d., **d-f**). (**a,d**) MOI 1; (**b,c,e,f**) MOI 0.1. (**g-h**) Model predicted cell and viral dynamics for MOI 0.1. (**i**) Model predicted dose response curves for fendiline effects on viral budding and entry in the BSL4 experiments.

Targeting PS levels to inhibit EBOV

**Tables**

Table 1. Antibodies used in immunoblotting

| Target         | Species | Tag       | Dilution  | Cat. #   | Company                     |
|----------------|---------|-----------|-----------|----------|-----------------------------|
| eVP40          | Rabbit  |           | 1/40,000  | 0301-010 | IBT Bioservices             |
| Rabbit         | Goat    | HRP       | 1/5,000   | 205718   | Abcam                       |
| GAPDH          | Mouse   |           | 1/5,000   | 8245     | Abcam                       |
| Mouse          | Sheep   | HRP       | 1/10,000  | 6808     | Abcam                       |
| EBOV-GP (KZ52) | Human   |           | 1.0 µg/ml | 0260-001 | IBT Bioservices             |
| Human          | Goat    | Alexa-488 | 0.7 µg/ml | A11013   | Invitrogen                  |
| MARV-GP (9G4)  | Mouse   |           | 4.0 µg/ml | N/A      | USARMIID Hybridoma Division |
| Mouse          | Goat    | Alexa-488 | 1.0 µg/ml | A11029   | Invitrogen                  |
| 6xHis          | Mouse   |           | 1/1,000   | A5588    | Sigma                       |

Table 2. Mathematical model parameter descriptions and values

| Symbol   | Description                                             | Unit                                      | Value from calibration to budding and entry assays | Ranges based on fits to budding and entry assays | Value from calibration to BSL4 data – using ranges defined by budding and entry assays |
|----------|---------------------------------------------------------|-------------------------------------------|----------------------------------------------------|--------------------------------------------------|----------------------------------------------------------------------------------------|
| $\beta$  | Infection rate constant of target cells by free virions | (Virion.day) <sup>-1</sup>                | N/A                                                | 0 - inf                                          | 6.6x10 <sup>-6</sup>                                                                   |
| $\delta$ | Death rate constant of infected cells                   | Day <sup>-1</sup>                         | N/A                                                | 0 - inf                                          | 4.6x10 <sup>-6</sup>                                                                   |
| c        | Decay rate constant of free virions                     | Day <sup>-1</sup>                         | N/A                                                | 0 - 5                                            | 5                                                                                      |
| p        | Viral production rate constant by infected cells        | Virions.(Infected cell.day) <sup>-1</sup> | N/A                                                | 1 - inf                                          | 49                                                                                     |

Targeting PS levels to inhibit EBOV

|             |                                                                   |               |      |          |      |
|-------------|-------------------------------------------------------------------|---------------|------|----------|------|
| $H_b$       | Hill constant for Fendiline effects on VLP budding                |               | 2.7  | 0.5 - 7  | 3.4  |
| $H_e$       | Hill constant for Fendiline effects on VLP entry                  |               | 11   | 0.5 - 20 | 4.7  |
| $C_{50}^b$  | Concentration with 50% of maximum Fendiline effect on VLP budding | $\mu\text{M}$ | 5.7  | 2 - 20   | 18   |
| $C_{50}^e$  | Concentration with 50% of maximum Fendiline effect on VLP entry   | $\mu\text{M}$ | 4.8  | 0.5 - 20 | 15   |
| $E_{max}^b$ | Maximum Fendiline effect on VLP budding                           |               | 0.98 | 0.3 - 1  | 0.3  |
| $E_{max}^e$ | Maximum Fendiline effect on VLP entry                             |               | 0.76 | 0.3 - 1  | 0.33 |



## Expanded View Figure Legends

### **Expanded View 1 (EV1)**

#### **Fluorescence profiles of PS and WT-eVP40 through confocal microscopy and plot profile analysis of fluorescently labeled GUVs and Alexa488-eVP40. a**

Representative confocal images of fluorescently labeled (TopFluor® TMR-PS) GUVs with varying lipid compositions (red) following incubation with eVP40-Alexa88 (green).

Colocalization between eVP40 and PS within GUVs was indicated by plot profile analyses of fluorescence signals between TopFluor® TMR-PS (red dotted line) and eVP40-Alexa488 (green solid line) performed at indicated open yellow lines in **a** and shown in

**b-d.** **b** Plot profile analysis of eVP40-Alexa488 and control GUVs (DPPC:Cholesterol:0.2mol% TopFluor® TMR-PS), **c** Plot profile analysis of eVP40-

Alexa488 and PS GUVs (DPPC:Cholesterol:0.2mol% TopFluor® TMR-PS:DPPS). \*

indicates overlap in fluorescence signals. **d** Plot profile analysis of eVP40-Alexa488 and PS+PI(4,5)P<sub>2</sub> GUVs (DPPC:Cholesterol:0.2mol% TopFluor® TMR-PS:DPPS:PI(4,5)P<sub>2</sub>).

PS: phosphatidylserine; DPPC: dipalmitoyl-phosphatidylcholine; DPPS: dipalmitoyl-phosphatidylserine.

### **Expanded View 2 (EV2)**

#### **Fluorescence profiles of PS and GFP-WT-eVP40 in HEK 293 cells through confocal**

**microscopy. a** Representative confocal images from live cell imaging of HEK293 expressing various GFP-fused proteins (GFP; green) following supplementation with

TopFluor® TMR-PS (red). Solid white lines indicate where plot profile analysis was

performed; scale bar= 10 μm. **b-c** Validation of ability to detect exogenously added

## Targeting PS levels to inhibit EBOV

fluorescently labelled PS within the inner leaflet of the plasma membrane of cells **b** Plot profile analysis of HEK293 cells expressing cytosolic GFP. **c** Plot profile analysis of HEK293 cells expressing the PS sensor GFP-LactC2 **d-e** Investigation of functionally distinct eVP40 proteins ability to bind to fluorescently labelled PS within the inner leaflet of the plasma membrane in living cells. **d** Plot profile analysis of HEK293 cells expressing GFP-WT-eVP40. **e** Plot profile analysis of HEK293 cells expressing GFP-K224A-eVP40 (PS-binding residue mutant). **f** Plot profile analysis of HEK293 cells expressing GFP-WE/A-eVP40 (oligomerization deficient mutant). TopFluor TMR-PS fluorescence signal intensity (red dotted line) and GFP fluorescence signal intensity (green solid line).

### **Expanded View 3 (EV3)**

**Validation of *in-vitro* and cellular PS clustering experiments.** **a** GUVs of varying compositions were imaged prior to and following the addition of 1.25  $\mu$ M eVP40-Alexa. eVP40-Alexa 488 enrichment ratios at the membrane of the GUVs was calculated by the ratio the Alexa488 fluorescence intensity at the GUV membrane / Alexa488 total fluorescence. Values are reported as mean  $\pm$  s.d.; of n=3. A two-way ANOVA with multiple comparisons was performed. \*p<0.0001. **b** Representative images of the step-wise image analysis workflow of quantifying PS clustering in living HEK293 cells expressing GFP-fused proteins using a custom ImageJ macro. scale bar= 10  $\mu$ m. **c** Representative images from live cell imaging experiments of HEK293 cells expressing control GFP-fused proteins specific for the plasma membrane (GPI), and specific lipids, PS (LactC2) and PI(4,5)P<sub>2</sub> (PLC $\delta$ -PH). scale bar= 10 $\mu$ m.

### **Expanded View 4 (EV4)**

**Profile of fendiline toxicity and efficacy in BSL-2 models. a** CellTiter-Glo® viability results of HEK293 cells. **a** HEK293 cells were treated with fendiline for 24 hours (black line) and 48 hours (blue line) and viability was assessed as a % viability of control. **b** PS saturation analysis from lipidomic analysis (LC/MS/MS) of total lipids extracted from HEK293 cells treated with the indicated concentration of fendiline (48 hours). Values are normalized to DMSO control and are reported as mean  $\pm$  s.d.; n=3; A one-way ANOVA was performed with multiple comparisons compared to the control DMSO. **c** PA level analysis from lipidomic analysis (LC/MS/MS) of total lipids extracted from HEK293 cells treated with 5  $\mu$ M fendiline (48 hours). Values are normalized to DMSO control and are reported as mean  $\pm$  s.d.; n=3; A two-tailed t-test was performed. **d-e** Analysis of PS plasma membrane localization in response to 24 hour fendiline treatment. **d** Representative confocal images from live cell imaging of HEK293 cells expressing GFP-LactC2 and treated with fendiline for 24 hours; scale bars= 10  $\mu$ m. **d** Effect of fendiline on PS plasma membrane localization was calculated by the ratio of GFP fluorescence at the (plasma membrane intensity/intracellular intensity). Values are normalized to DMSO control and are reported as mean  $\pm$  s.d.; N>15, n=3; A one-way ANOVA was performed with multiple comparisons compared to the DMSO control. \*\*p=0.0045; \*\*\*p=0.0003. **f** N&B analysis of HEK293 cells expressing the control GFP. Analysis was performed at 48 hours post treatment (DMSO) to align with N&B analysis performed on experiments with HEK293 cells expressing GFP-LactC2 or GFP-eVP40 and treated with the control or fendiline. *Left panel:* Representative images from time-lapse (30 frames) of HEK293 expressing EGFP and treated with fendiline for 48 hours. scale bar = 5  $\mu$ m. *Middle panel:*

## Targeting PS levels to inhibit EBOV

Brightness and Intensity plots for representative image. *Right panel:* Selection map correlating each pixel in the representative image to an oligomerization state (b value) (red: monomer). PS: phosphatidylserine; PA: phosphatidic acid; N&B: number & brightness analysis.

### **Expanded View 5 (EV5)**

**Vero E6 toxicity and effect of fendiline on eVP40 plasma membrane localization at 24 hours post treatment.** **a** CellTiter-Glo® viability results of Vero cells. Cells were treated with control or fendiline for 48 hours according to the BSL-4 infection model; d-1/0 (black line), e.d. (blue line) and e.o.d (gray line) and viability was assessed as a % viability of control. **b-c** Effect of fendiline on eVP40 PM localization in HEK293 cells after 24 hours of treatment. **b** Representative confocal images from live cell imaging experiments of HEK293 cells expressing EGFP-WT-eVP40 after 48 hours of fendiline treatment. scale bars= 10  $\mu$ m. **c** Effect of fendiline on eVP40 PM localization was quantified by the ratio of EGFP fluorescence intensity at the PM / total GFP fluorescence intensity (and normalized to DMSO control). N>15, n=3. Values are reported as mean  $\pm$  s.d. A one-way ANOVA with multiple comparisons was performed compared to the DMSO control. PM: plasma membrane.

### **Expanded View 6 (EV6)**

**Thermal melting of eVLPs produced in the presence and absence of fendiline.** **a** Ebola virus-like particles (eVLPs) were produced in DMSO treated HEK293 cells expressing FLAG-eVP40 and eGP constructs which were then collected, purified, and melted while measuring the loss in polarized light absorption at 220 nm. **b** Prior to melting, the circular dichroism spectra of DMSO

## Targeting PS levels to inhibit EBOV

VLPs was measured alongside the absorbance and detector (hv) signals. **c** Ebola VLPs were produced in 5  $\mu$ M fendiline treated HEK293 cells using the same FLAG-eVP40 and eGP constructs which were then collected, purified and melted while measuring the loss in polarized light absorption at 220 nm. **d** Prior to melting, the circular dichroism spectra of Fendiline VLPs was measured alongside the absorbance and detector (hv) signals.

### **Expanded View 7 (EV7)**

**Calibration results from the first and second phase of model development. a-c** First phase calibration results between experimental (black bars) and simulation (gray) data from budding (**a-b**) and entry (**c**) assays. **d-e** Second phase calibration results showing comparison between experimental and simulation data from cell viability assays. The mathematical model was calibrated to this data and the data in Figure 8 in the main text simultaneously.

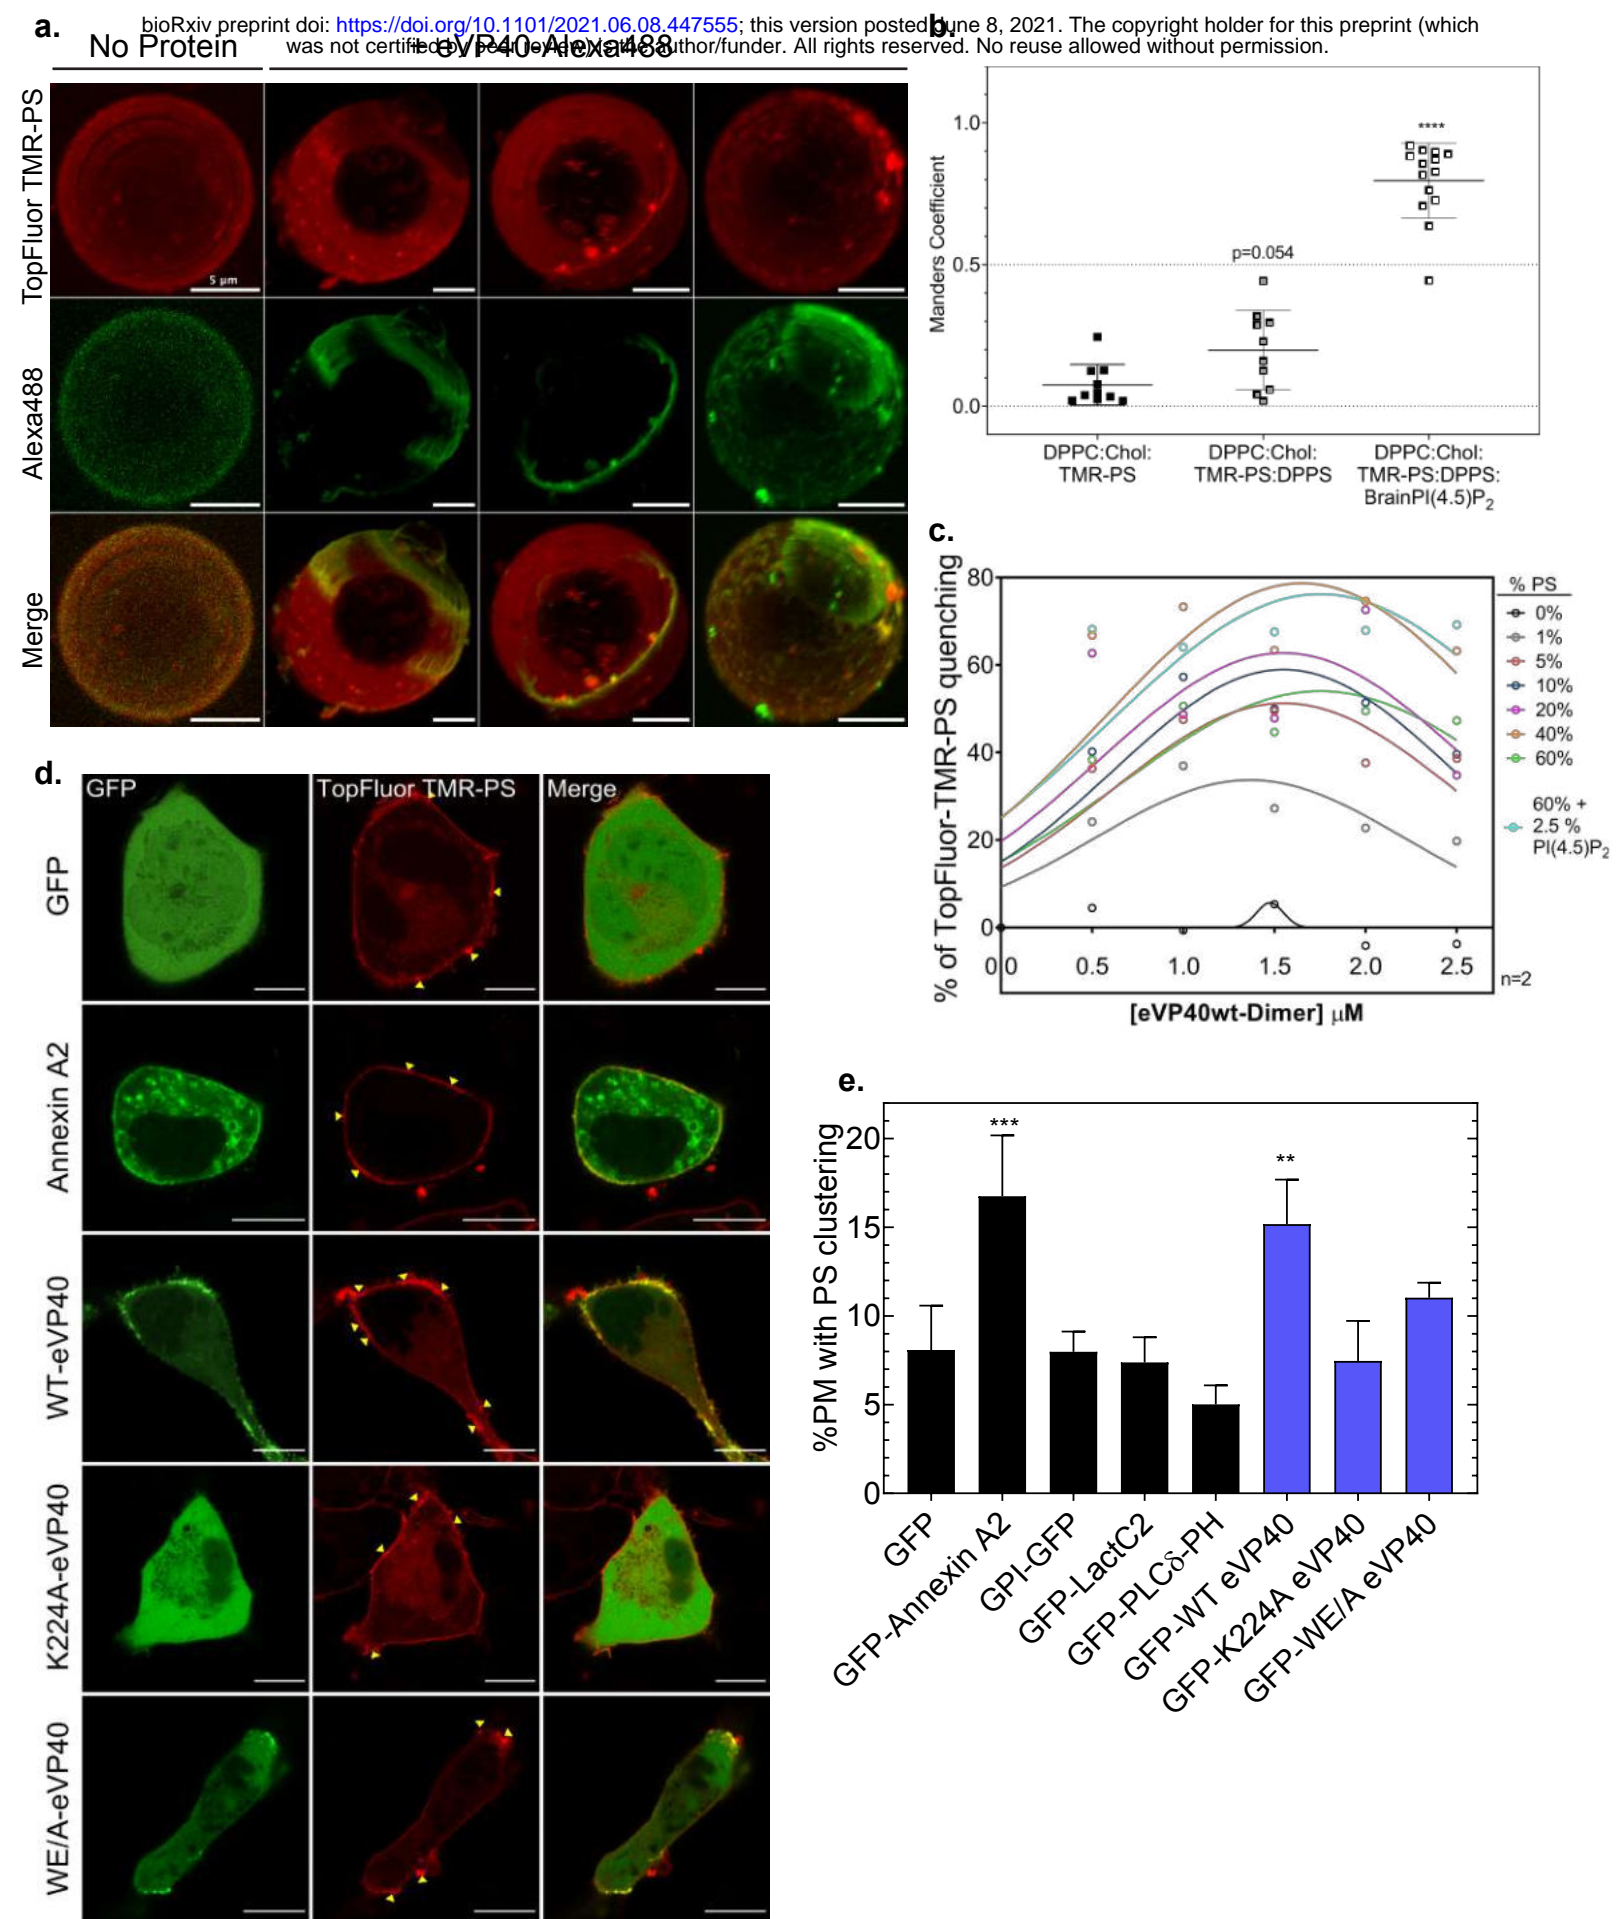

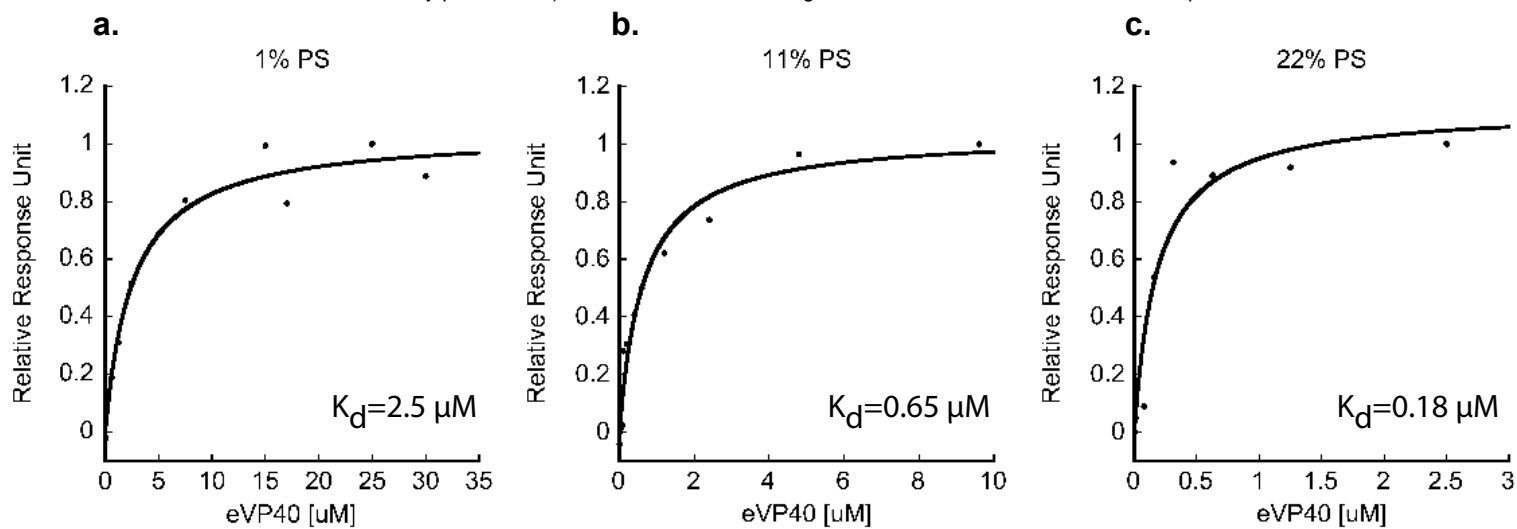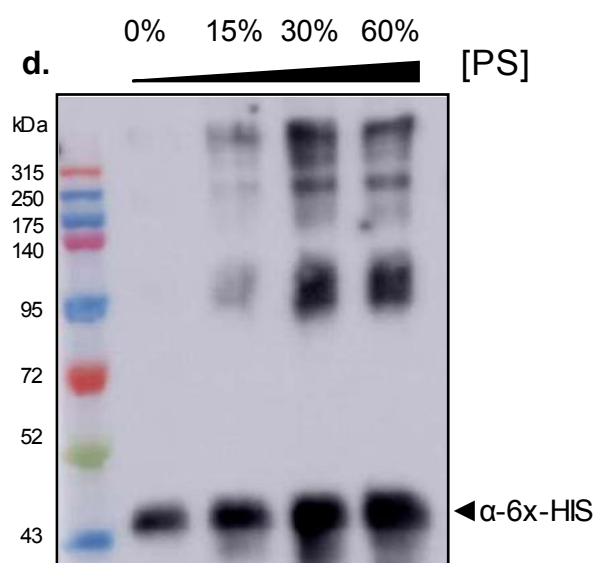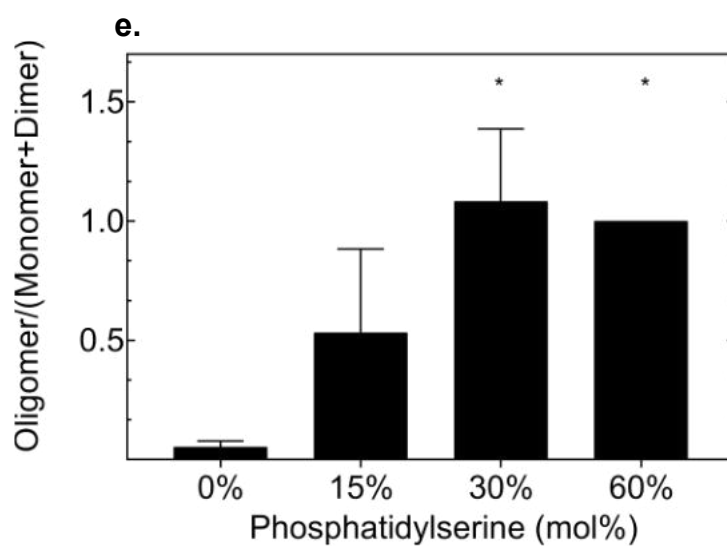

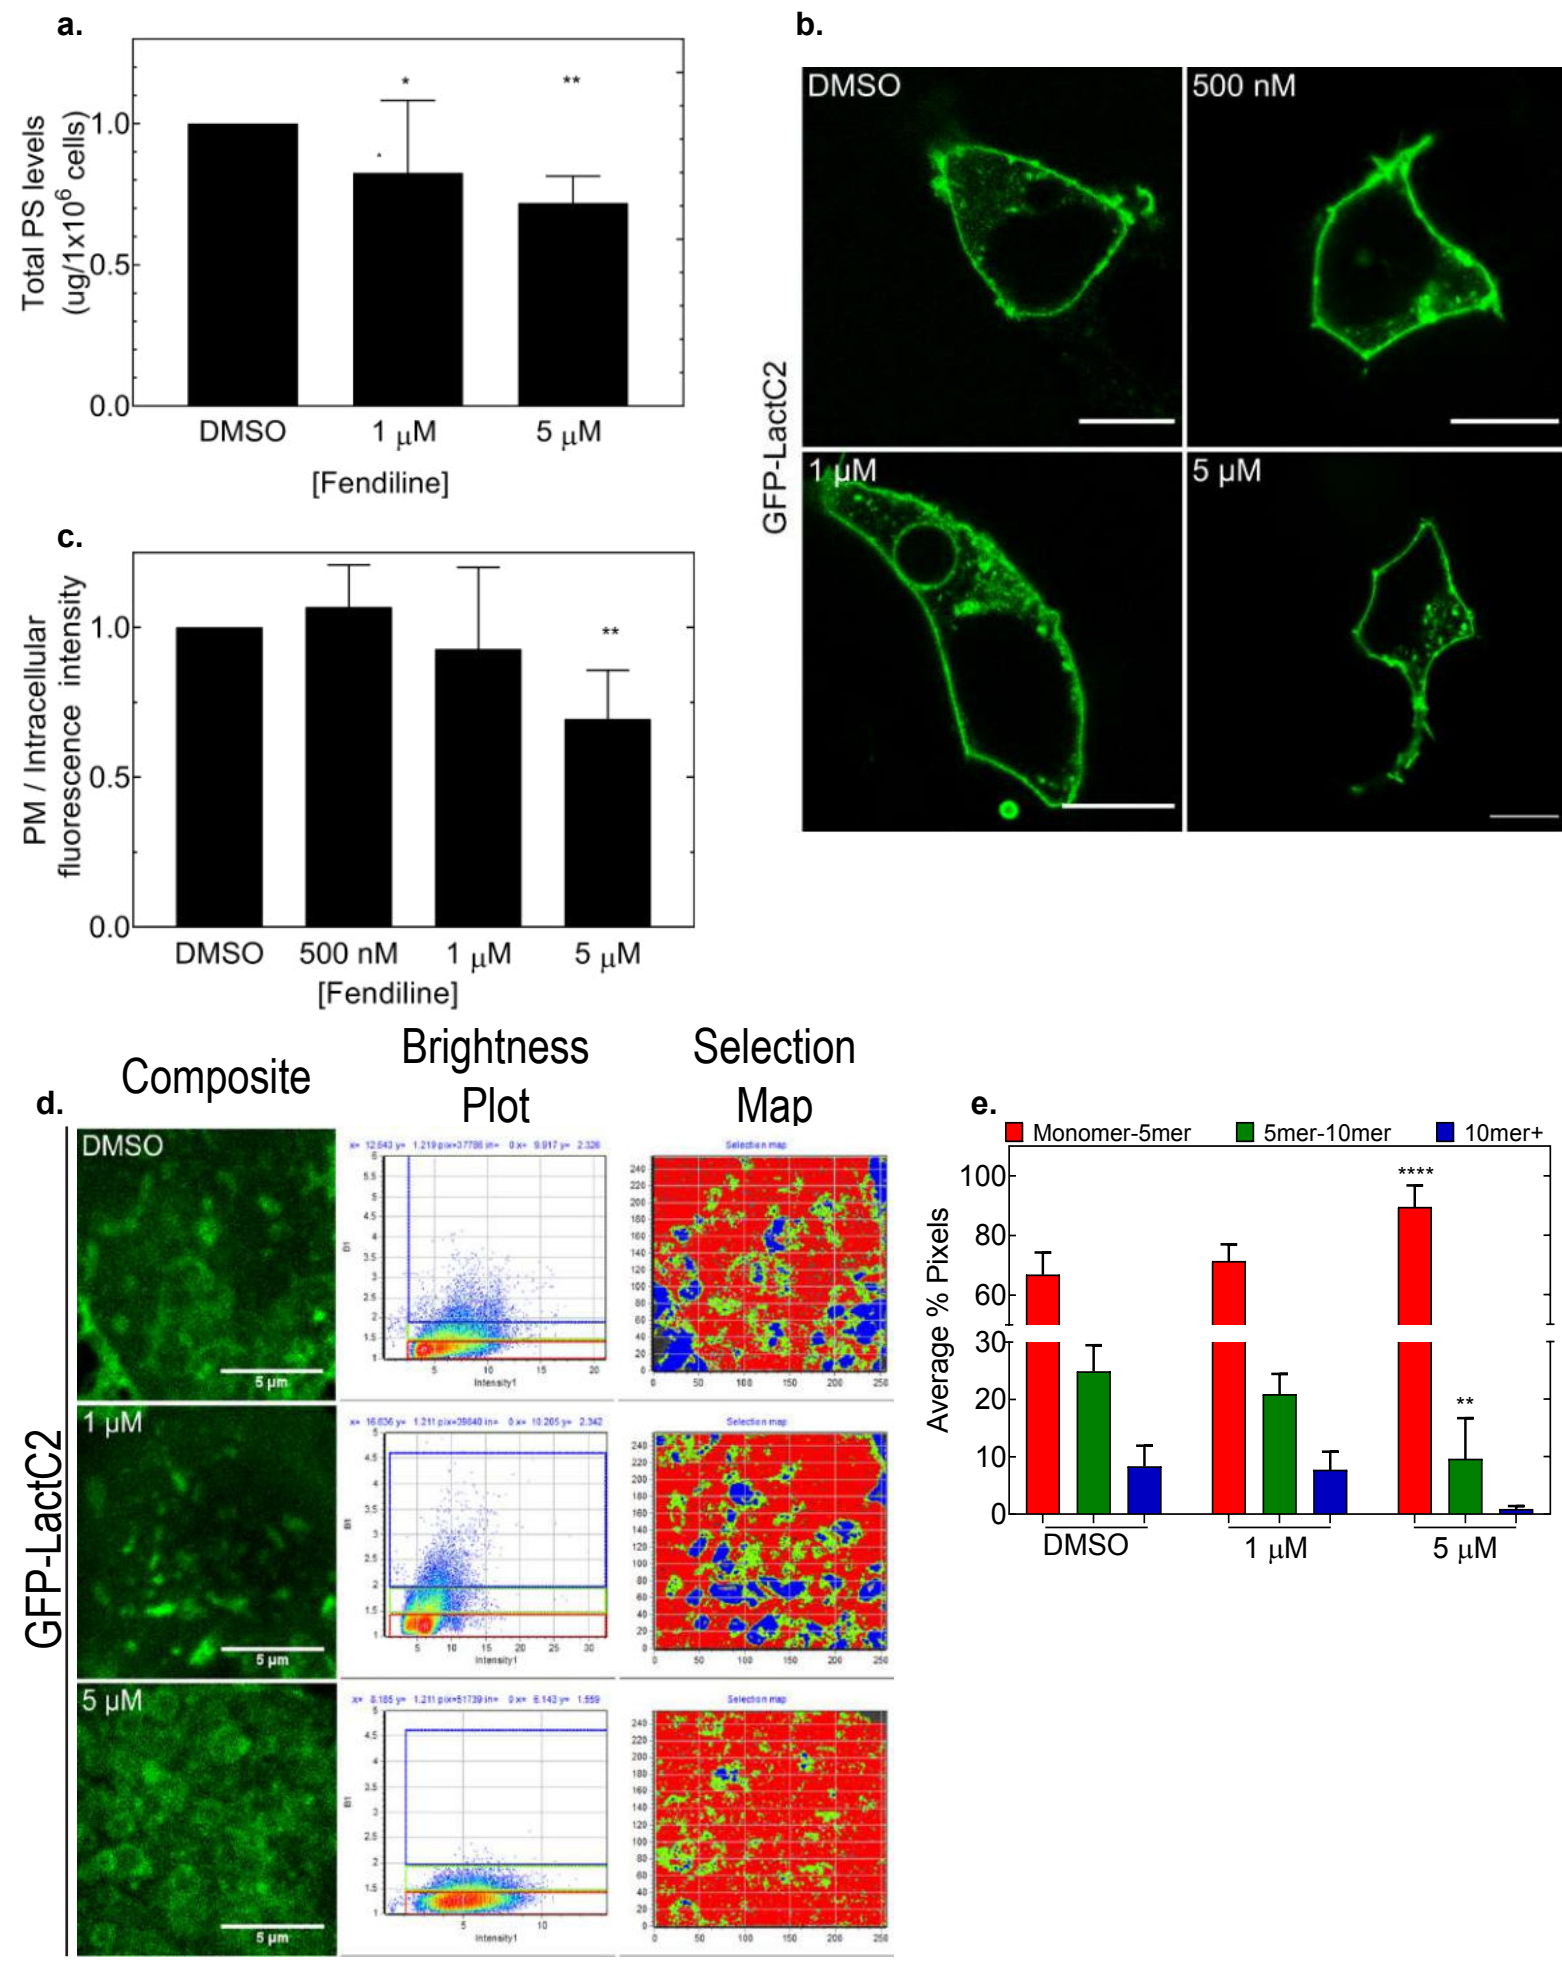



## EBOV - Fendiline Treated

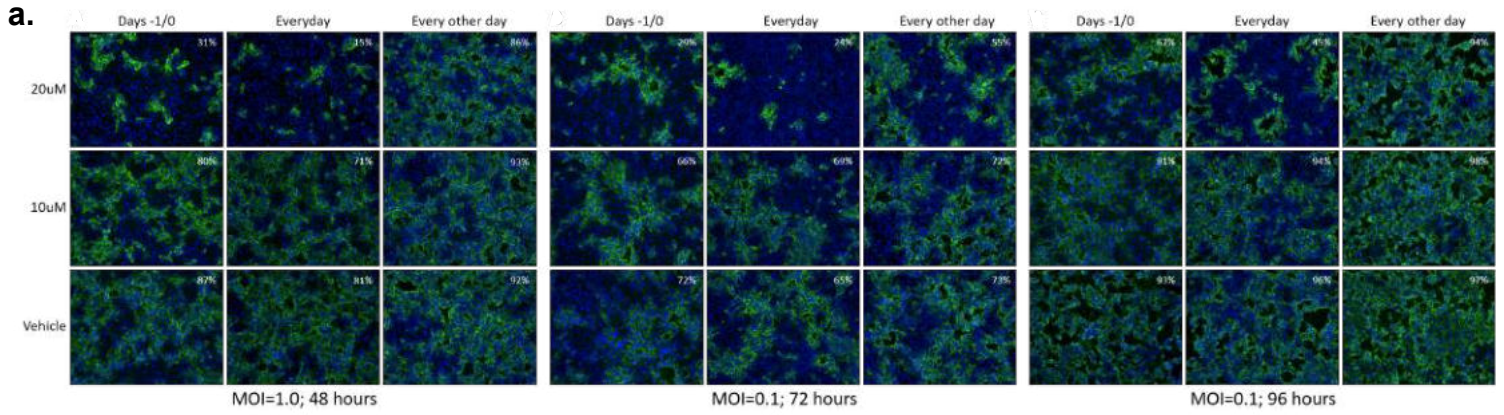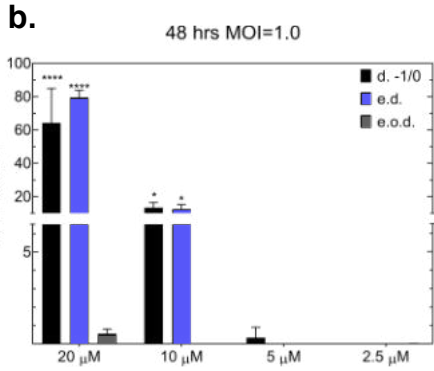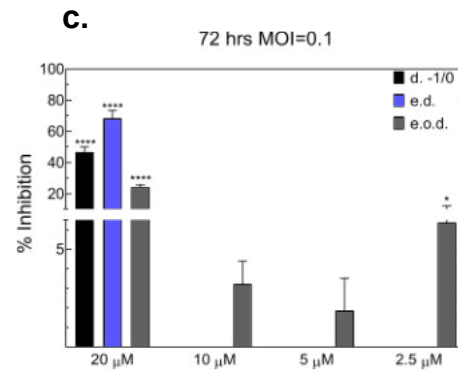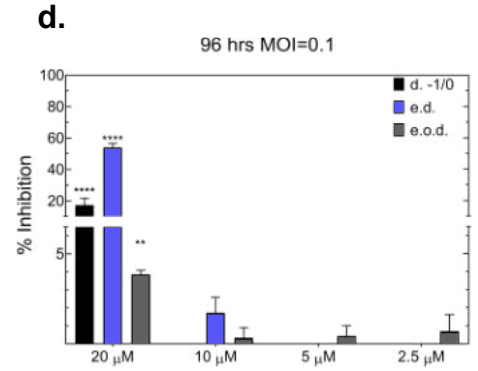

## MARV - Fendiline Treated

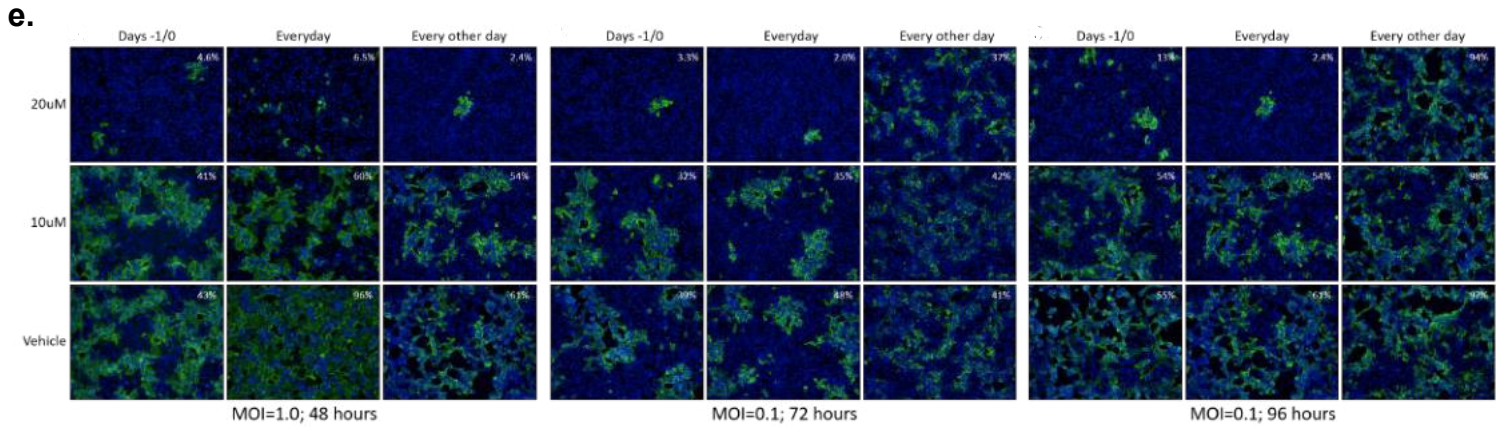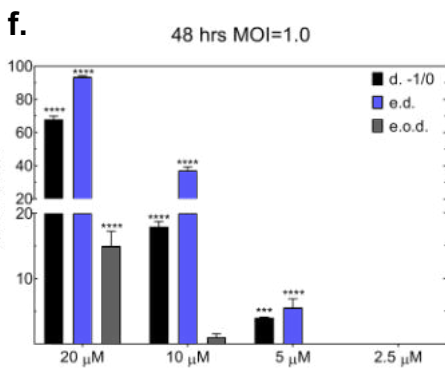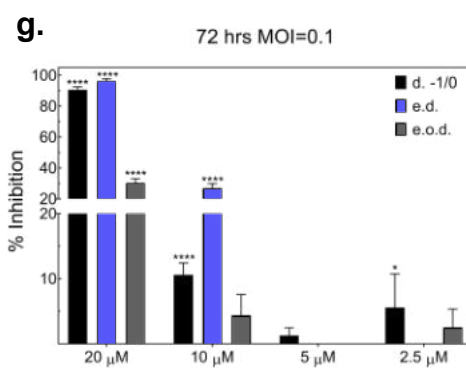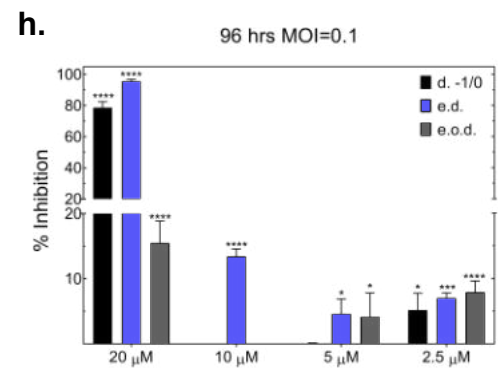

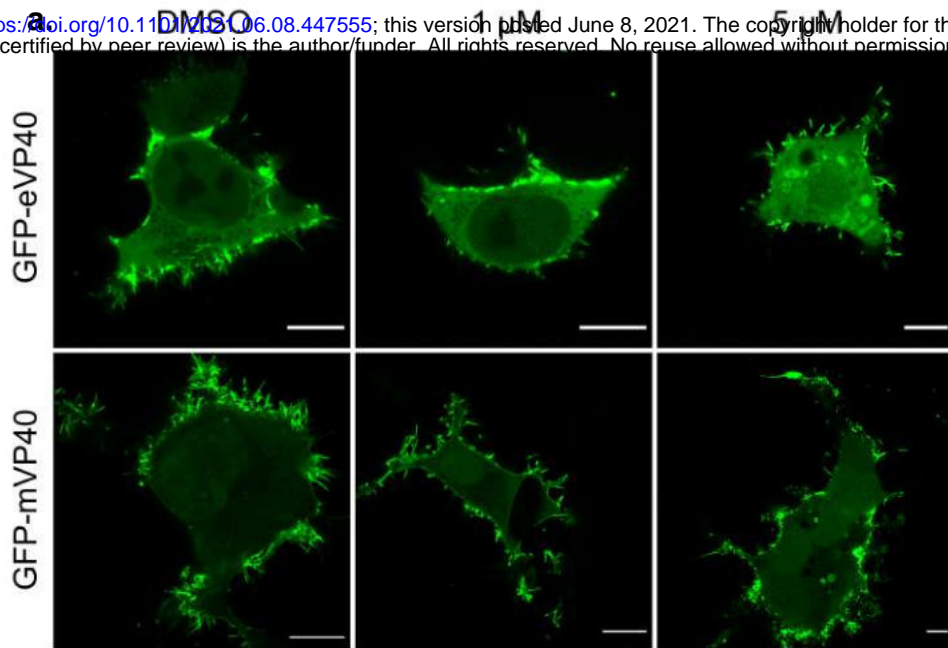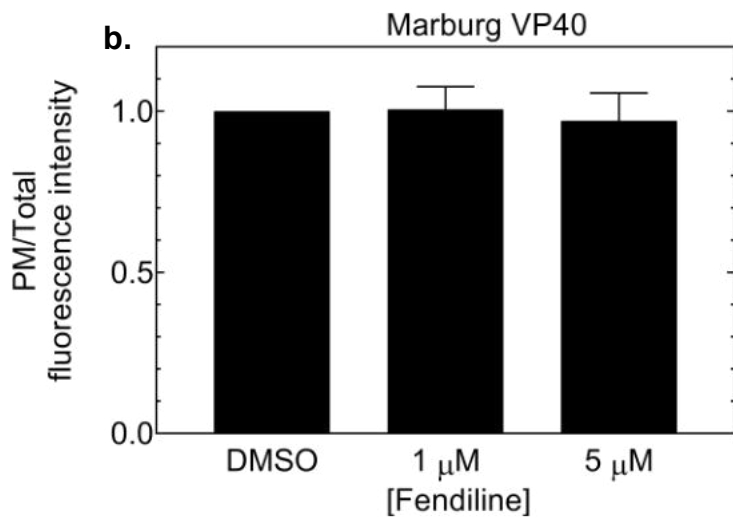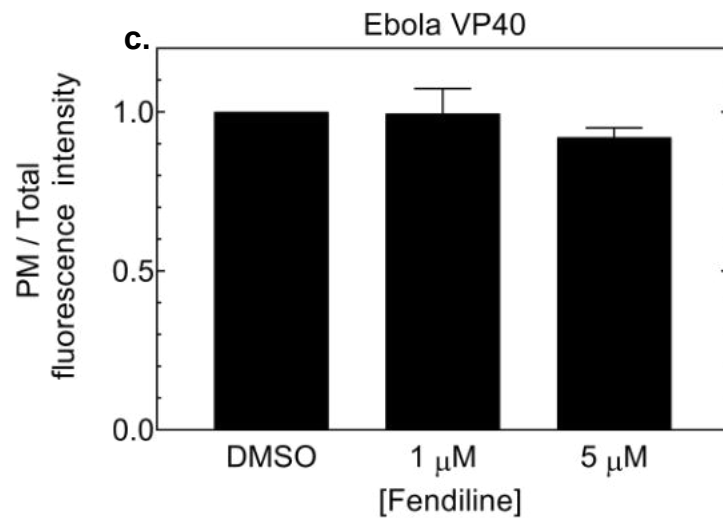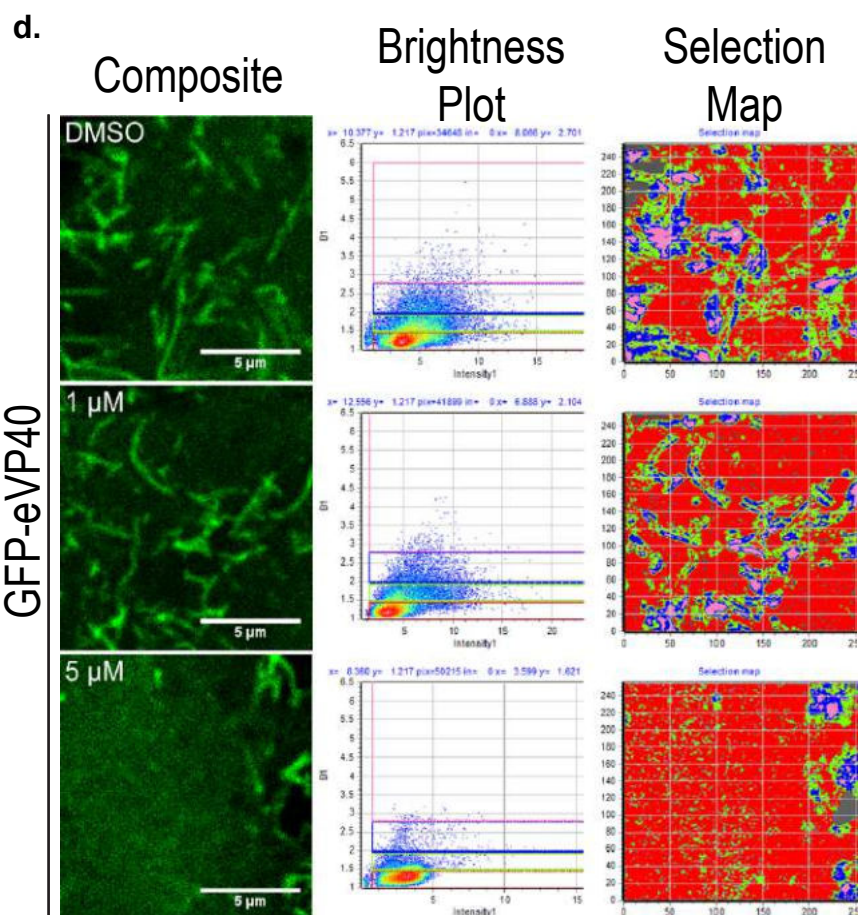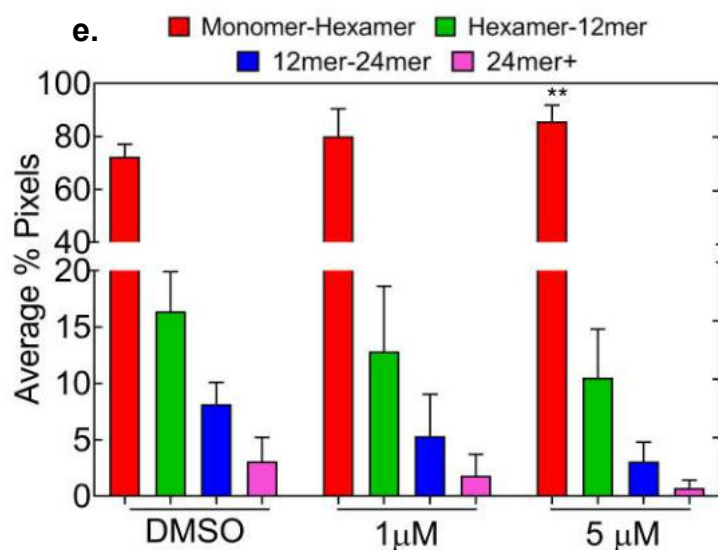

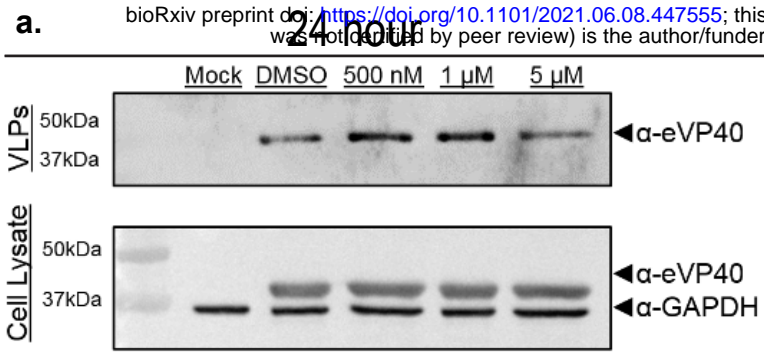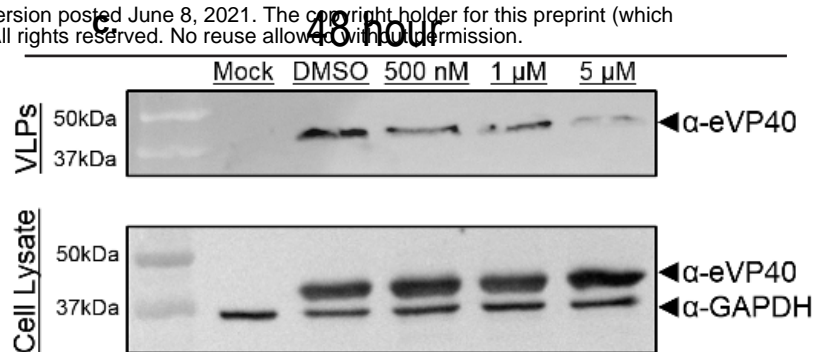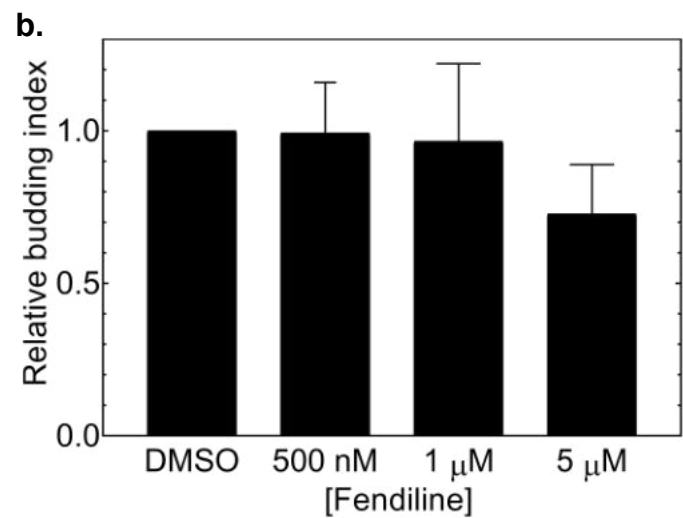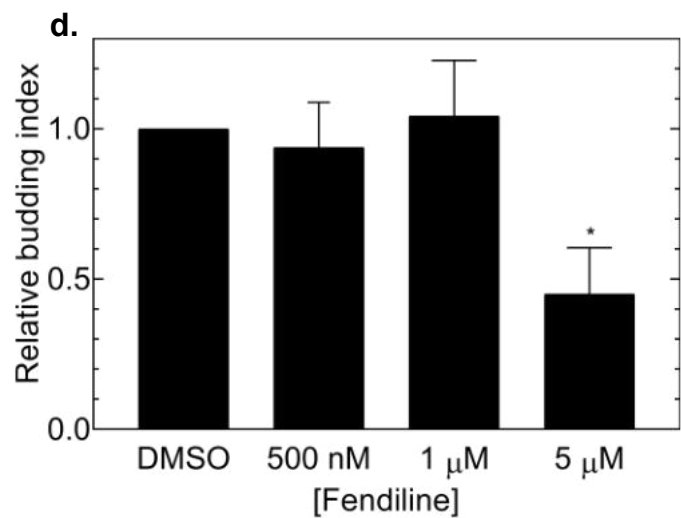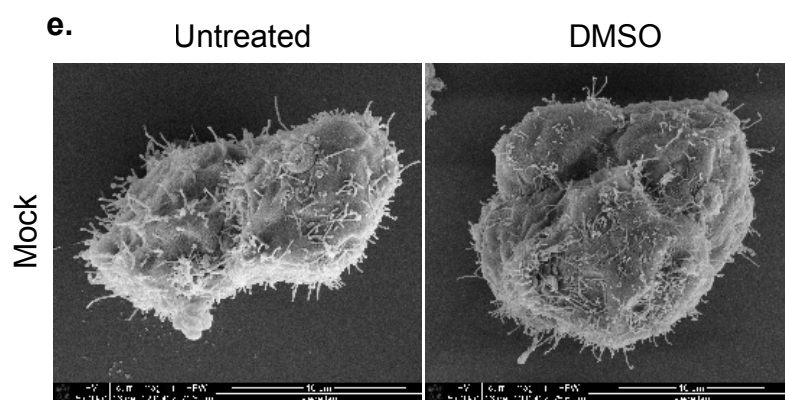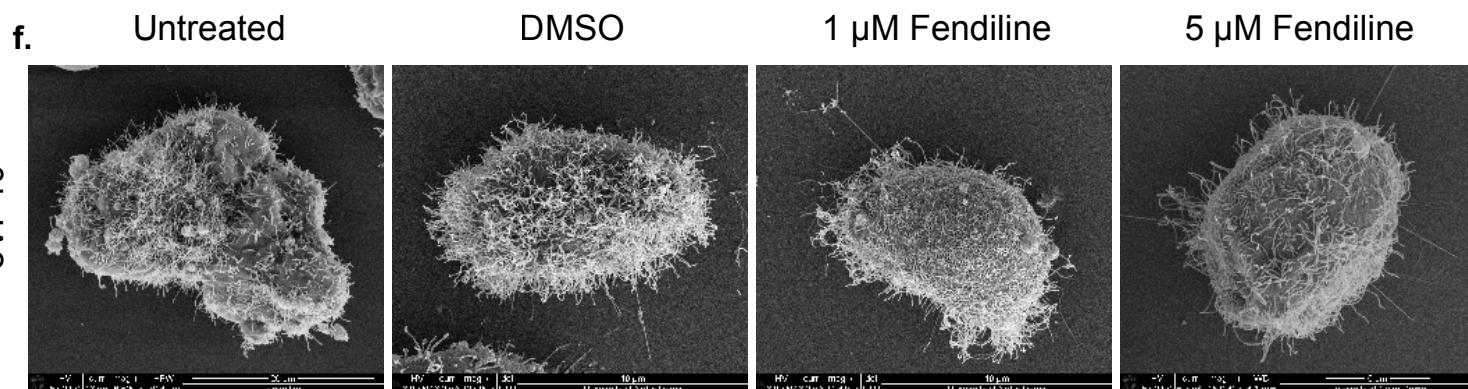

**a.**

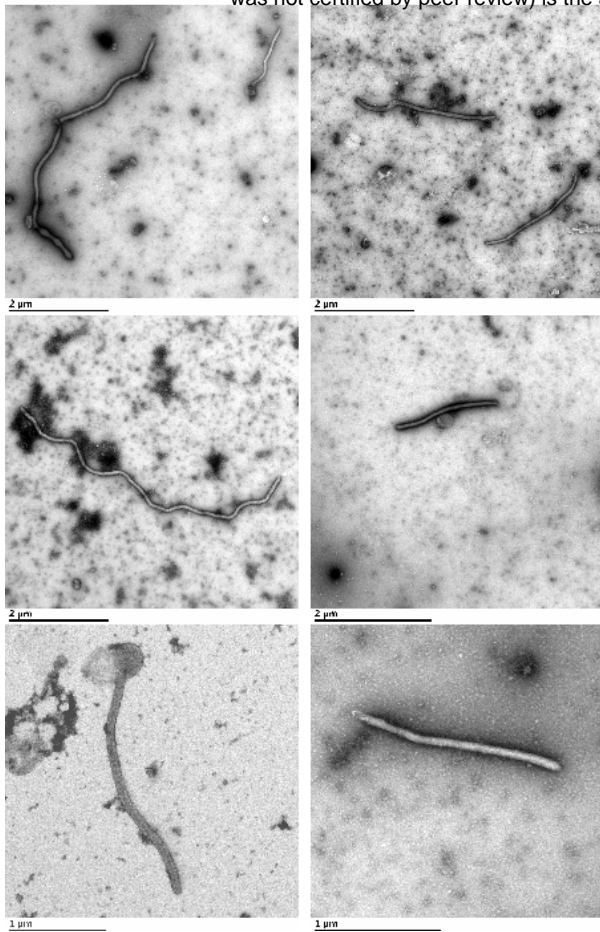

**b.**

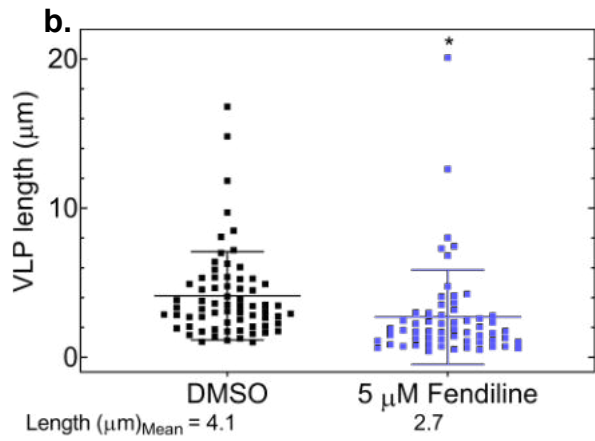

**c.**

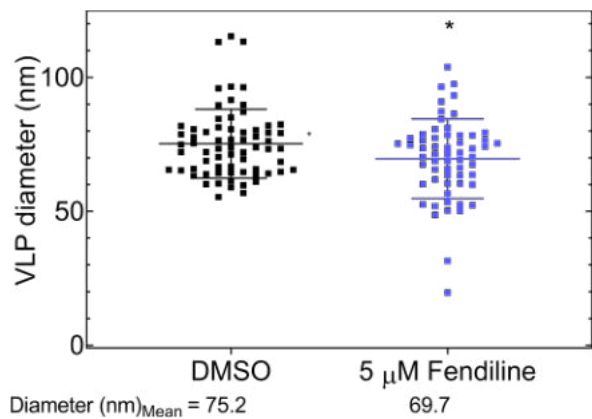

**d.**

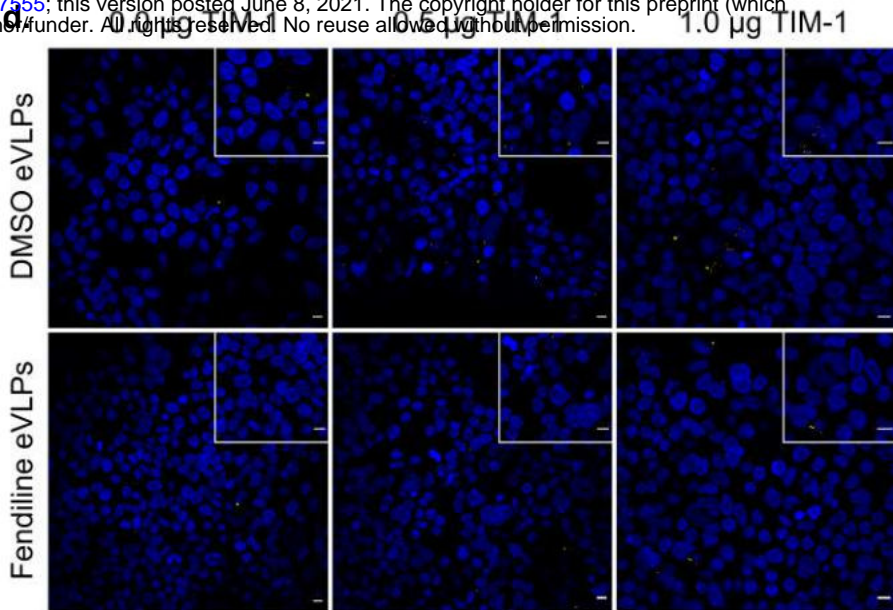

**e.**

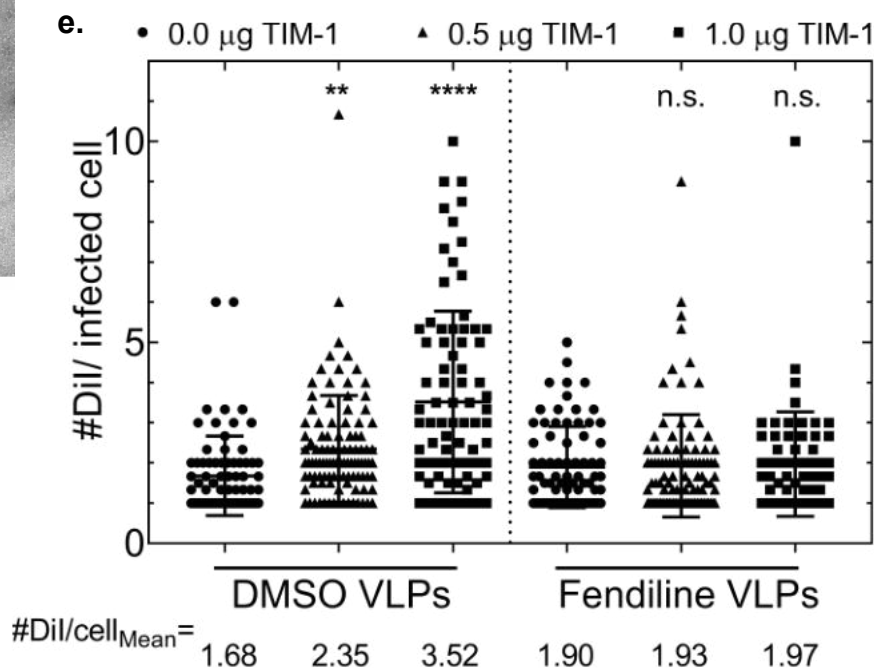

## Pre-infection treatment

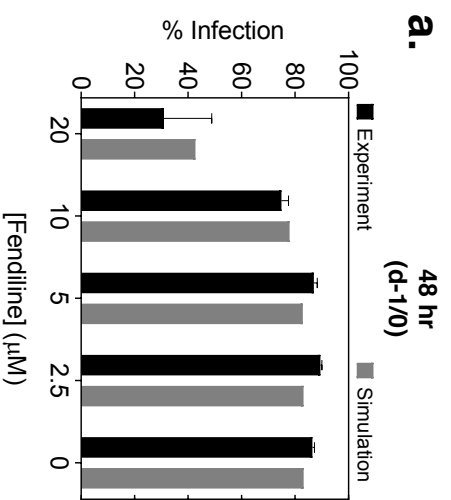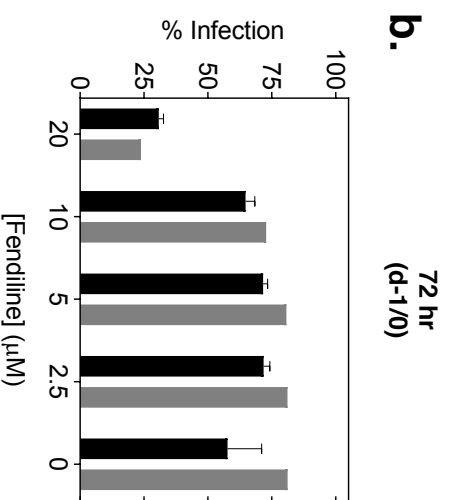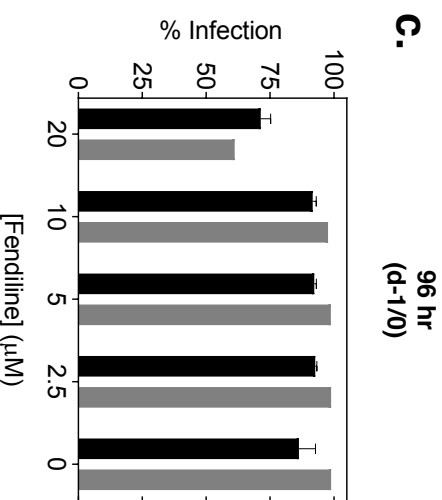

## Daily treatment

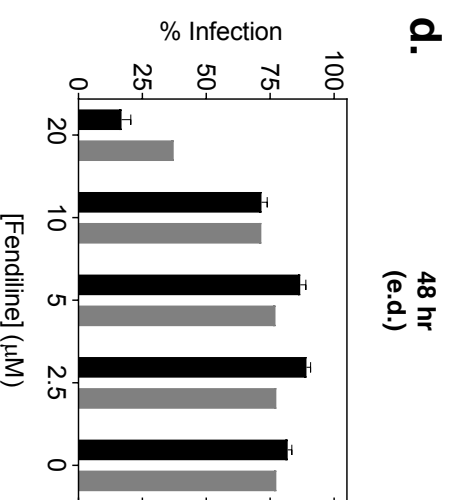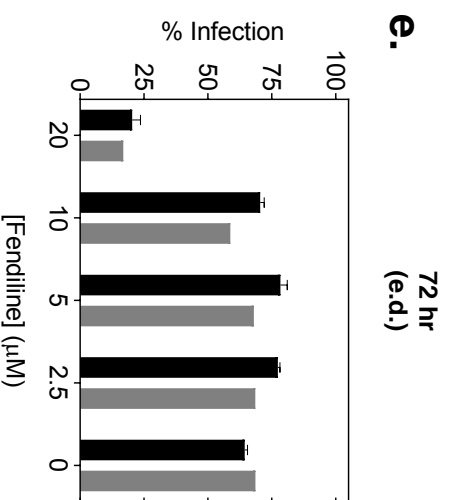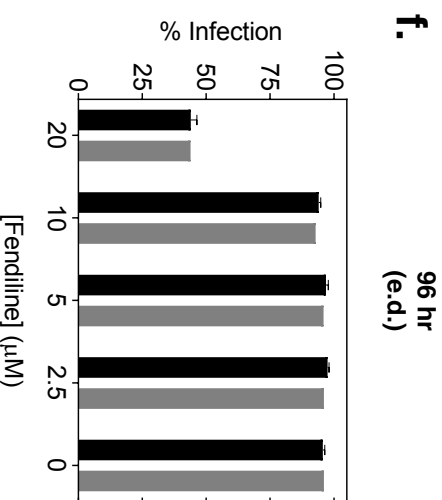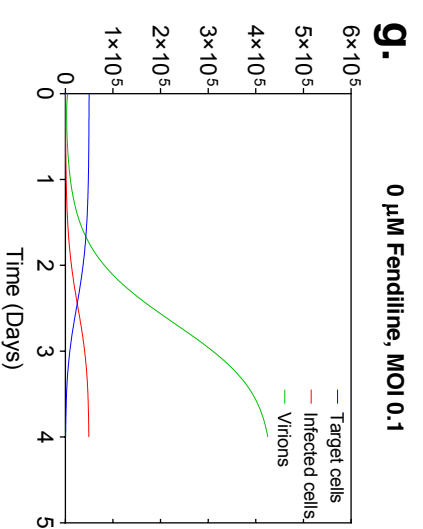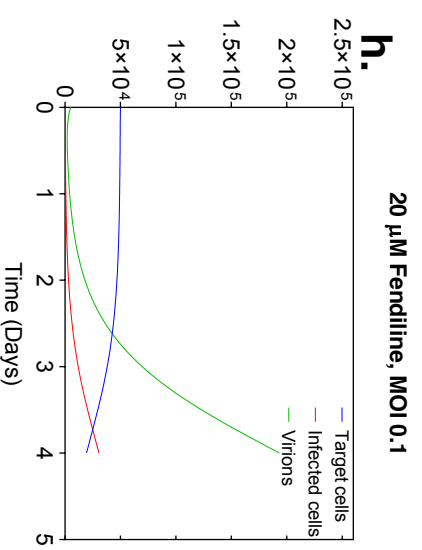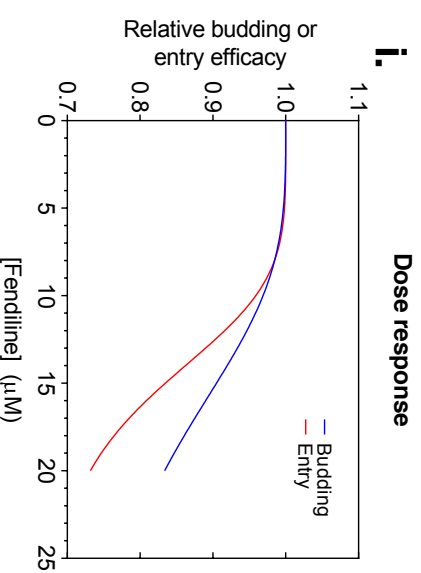

**a.** DPPC:Chol + DPPS + DPPS:PI(4,5)P<sub>2</sub>

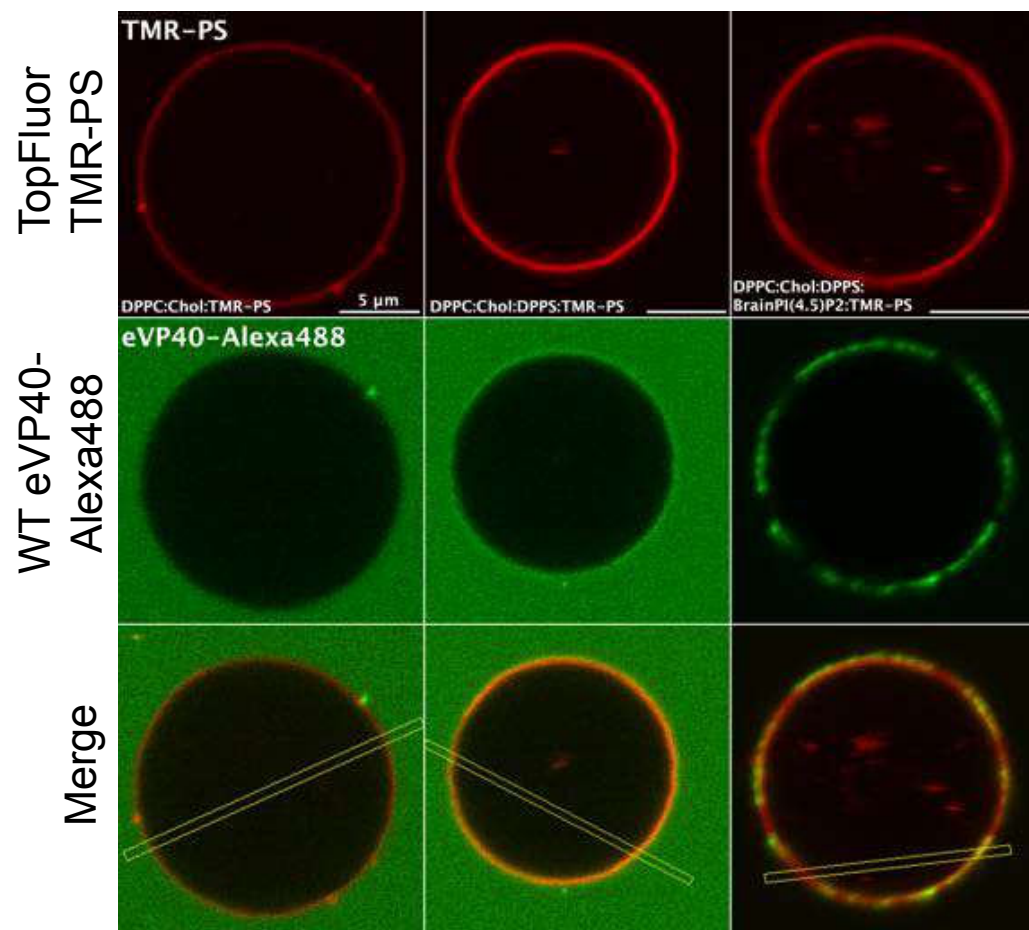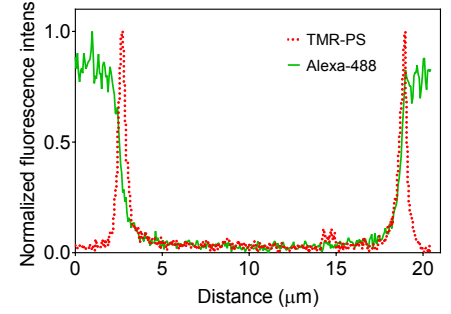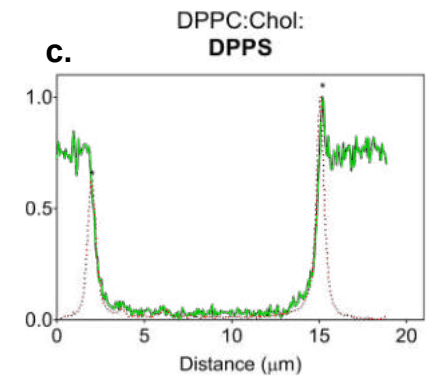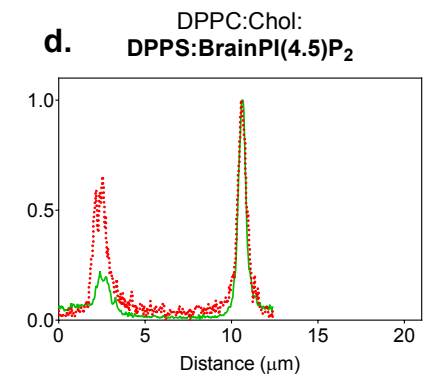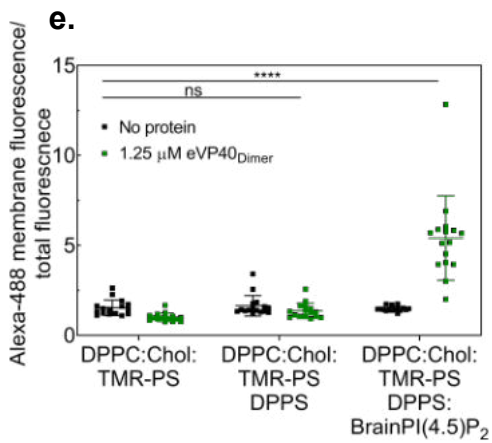

**EV1**

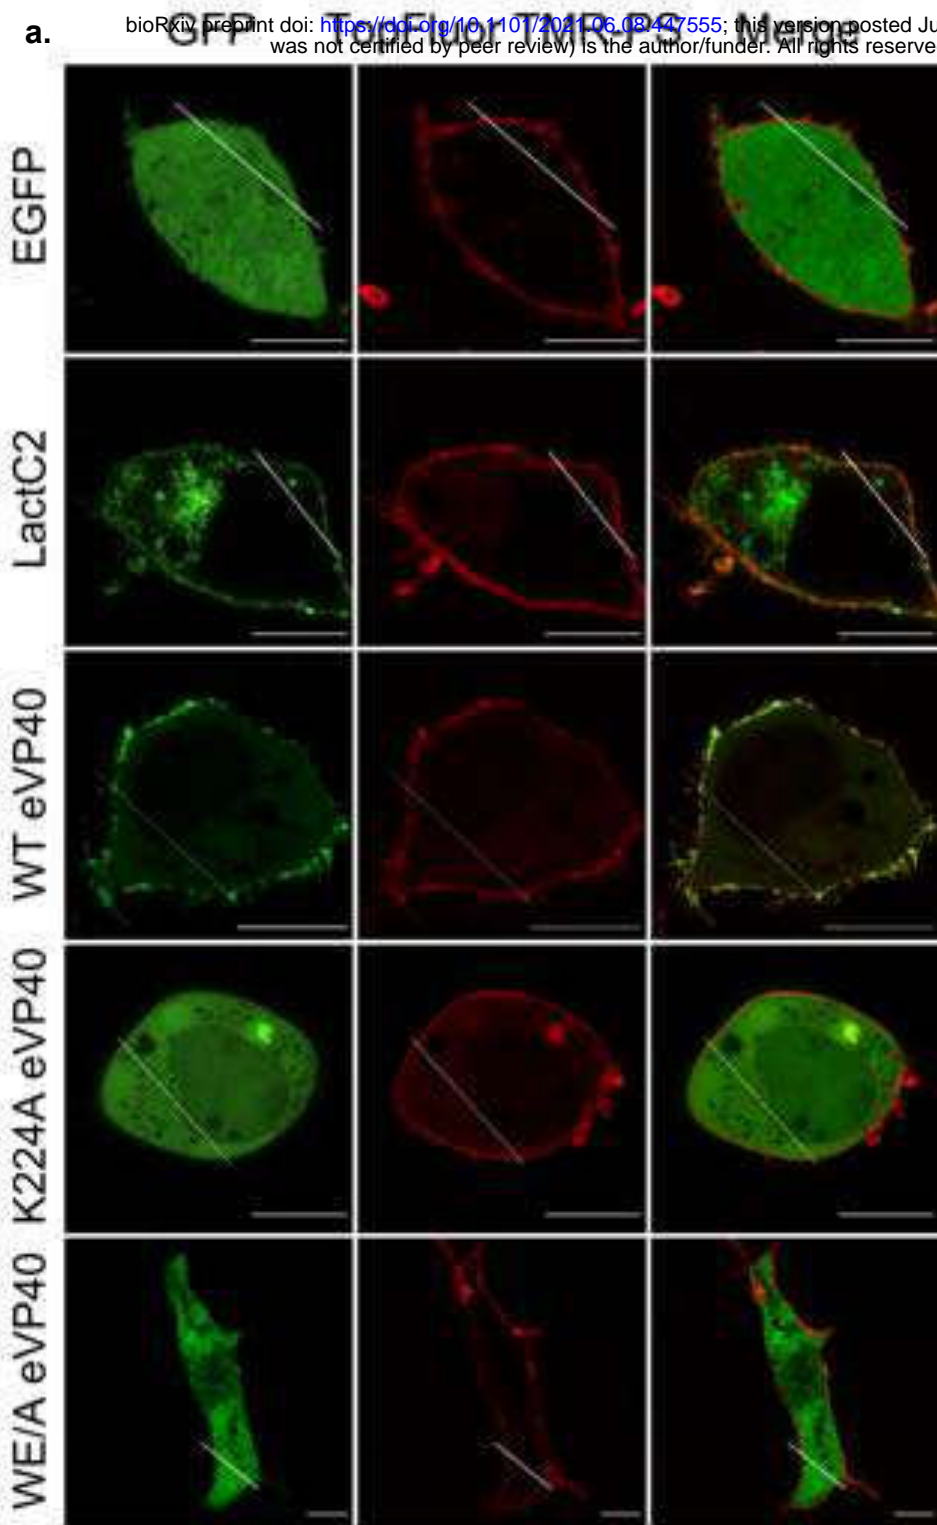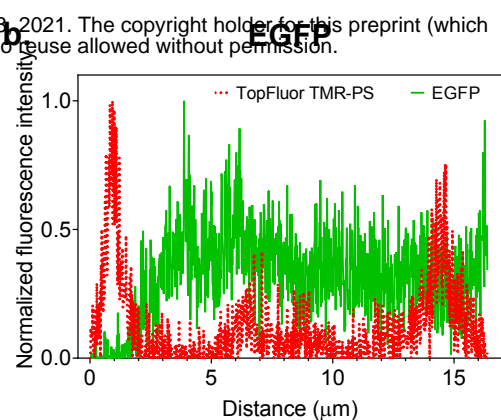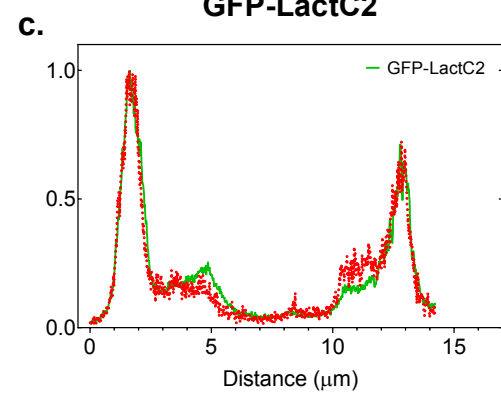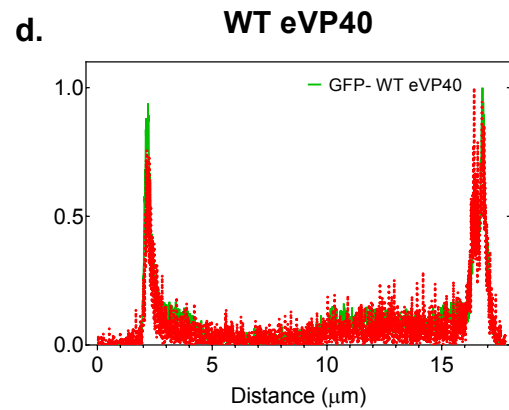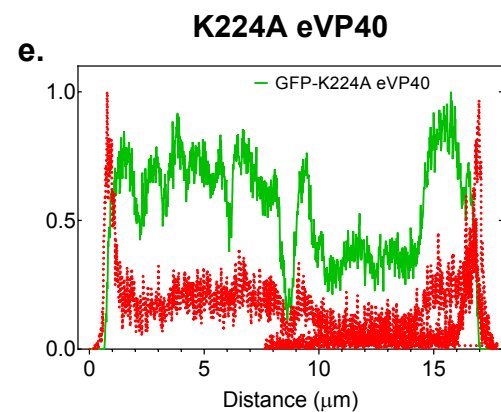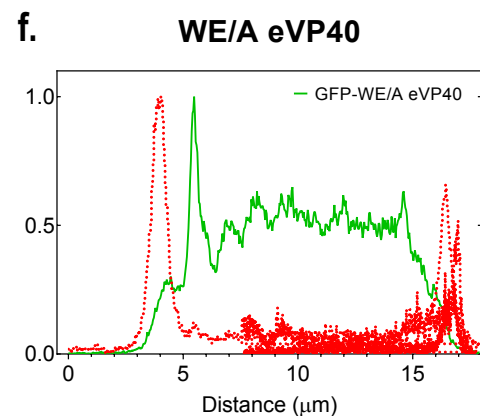

EV2

a.

Image      Membrane      Clusters      Overlay      Merge

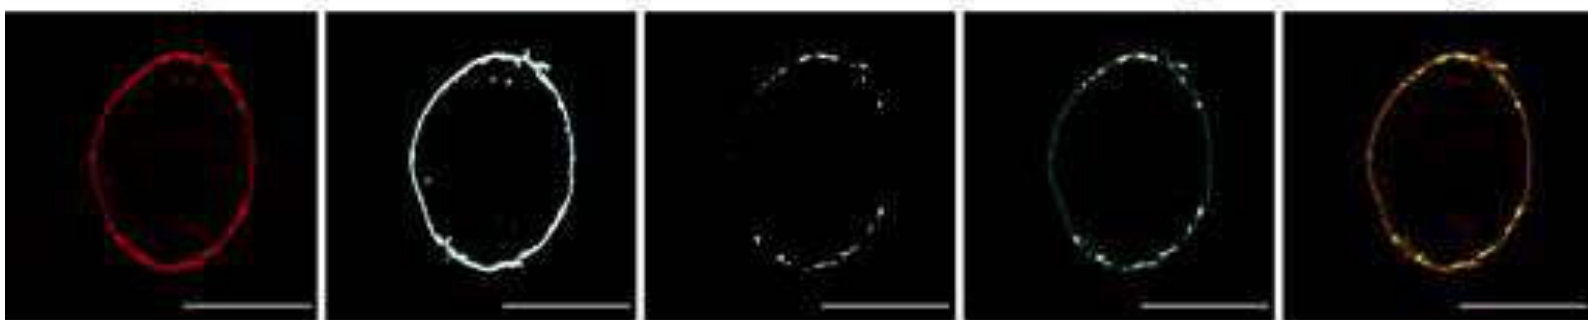

b.

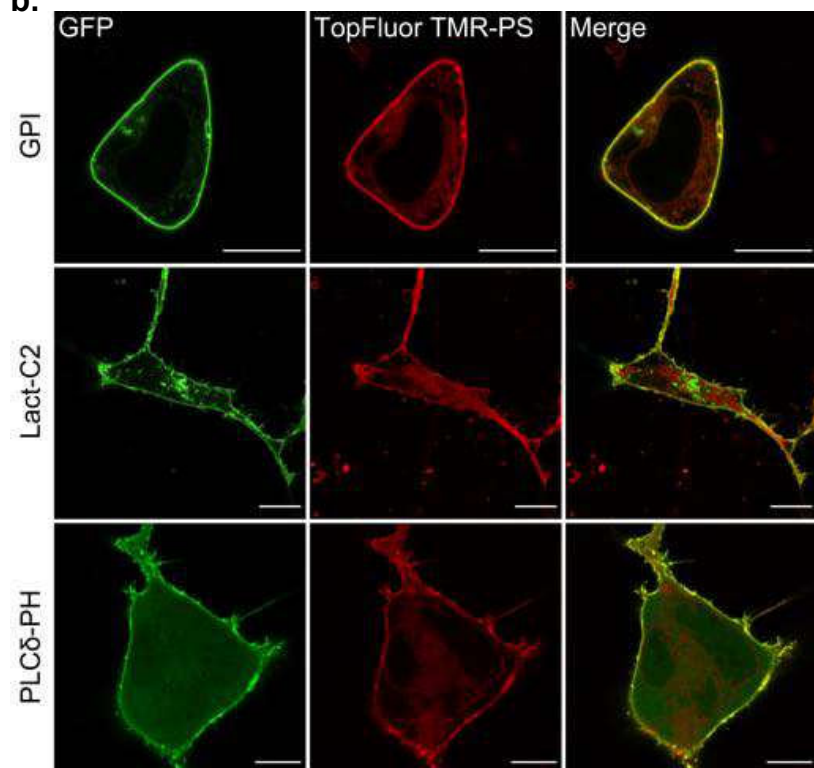

EV3



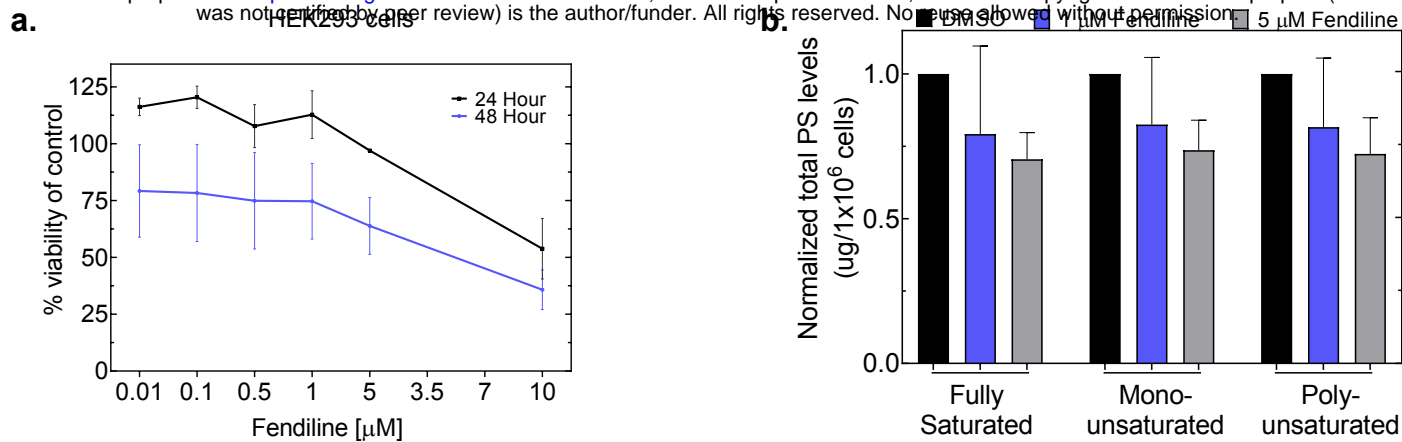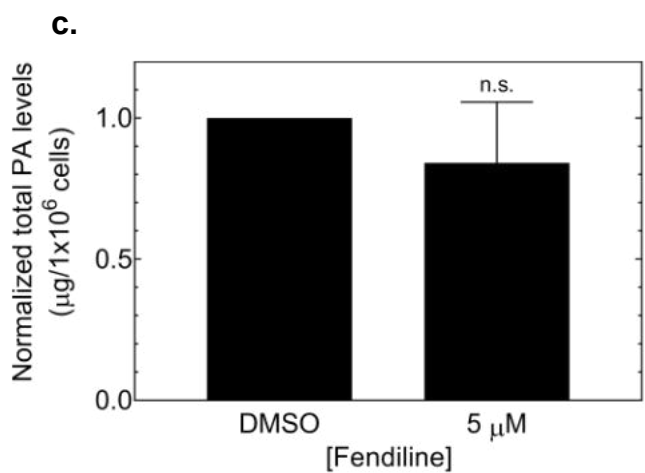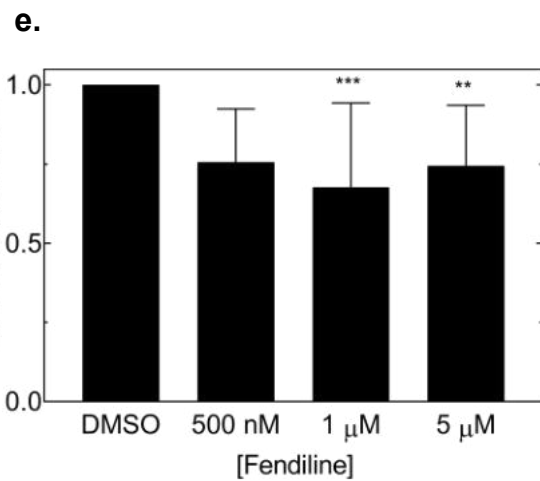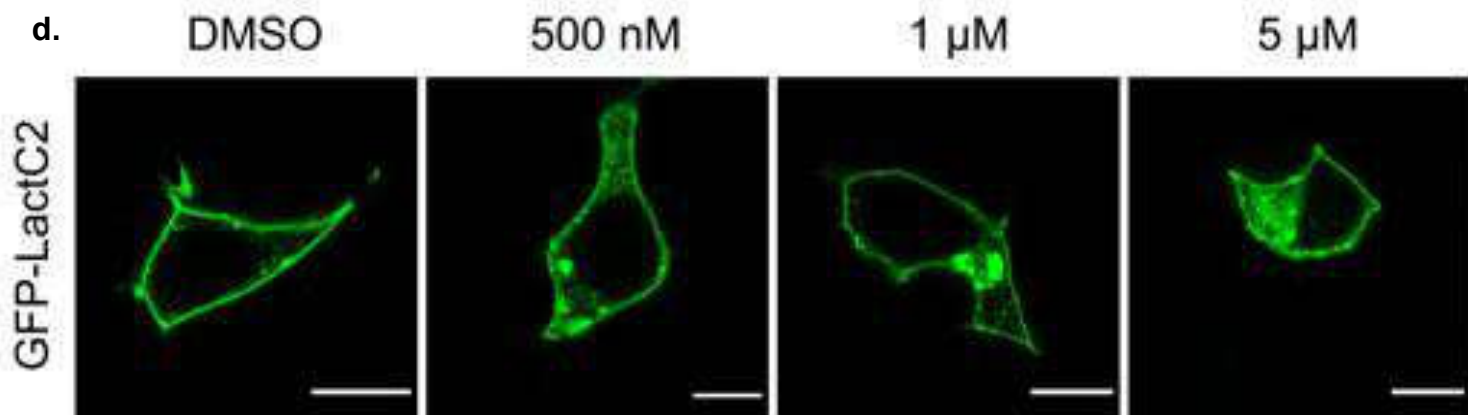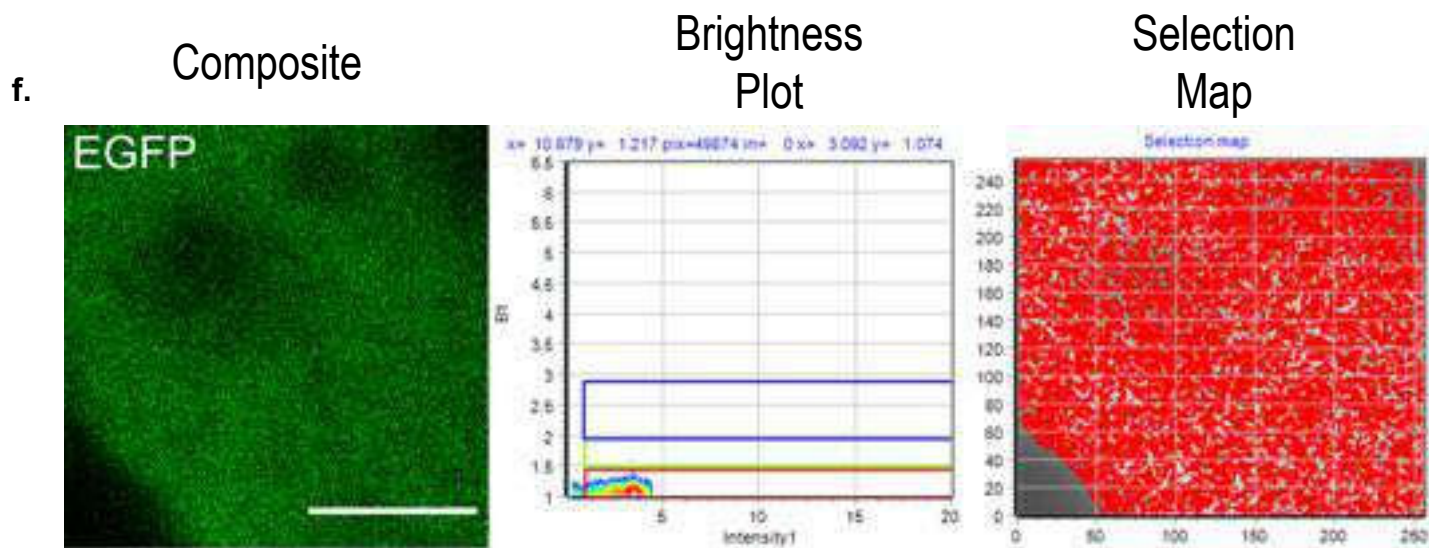

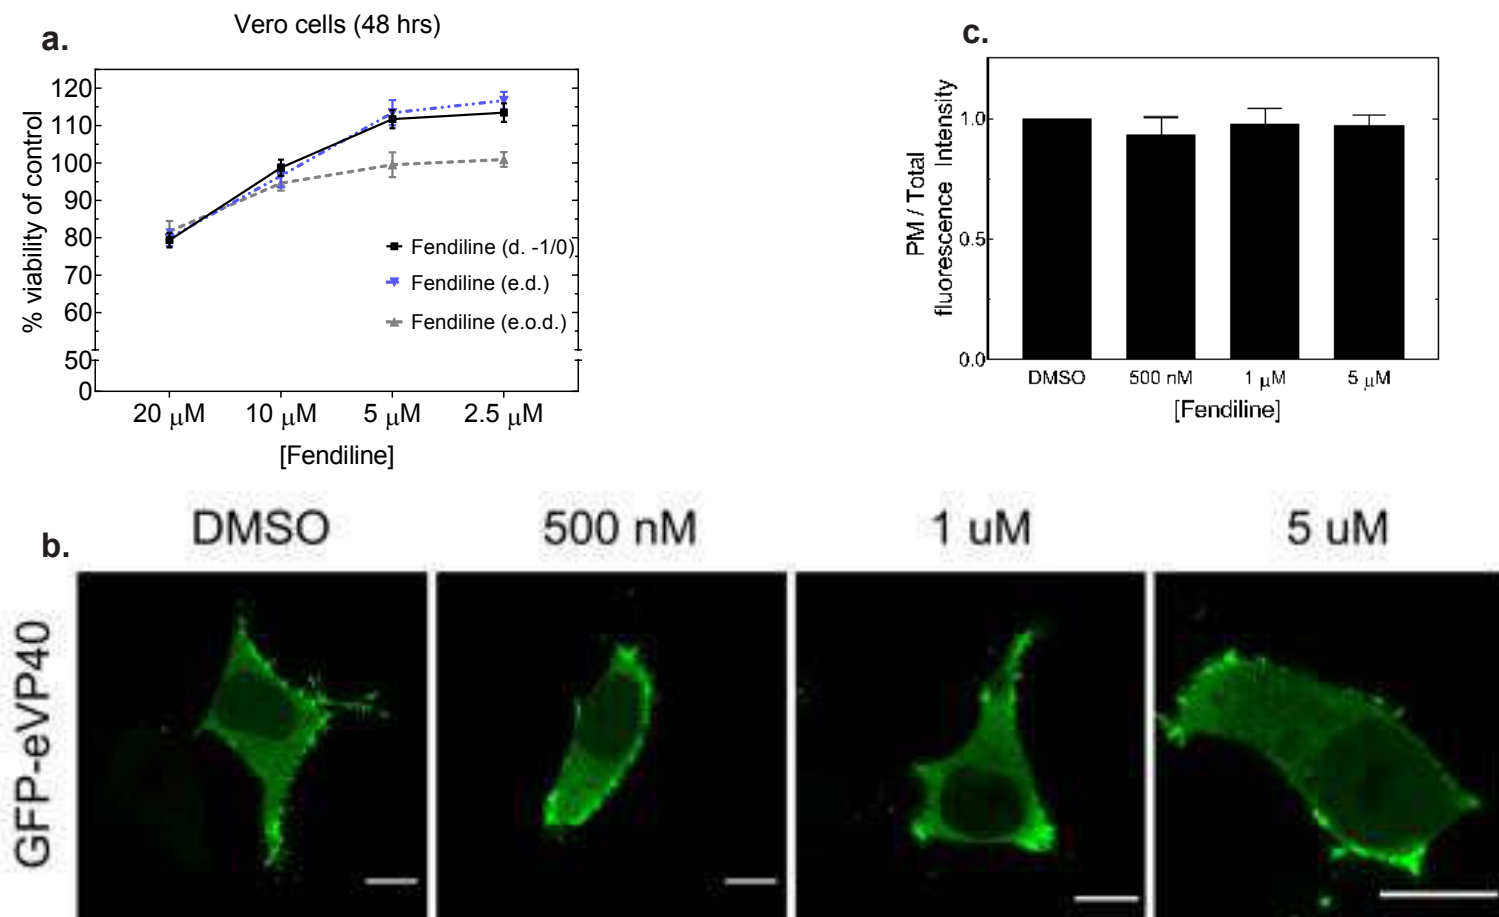

**EV5**

**a.**

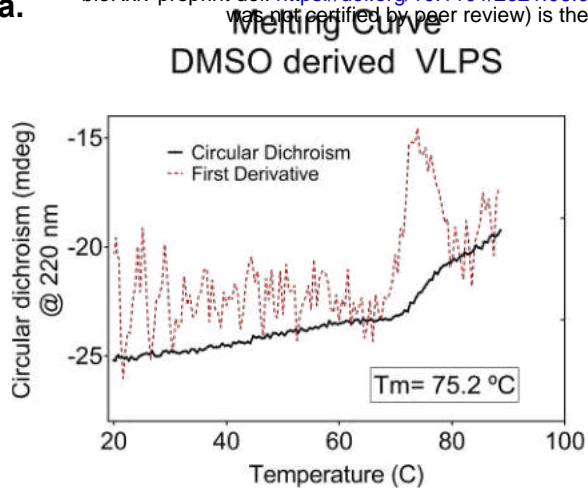

**c.**

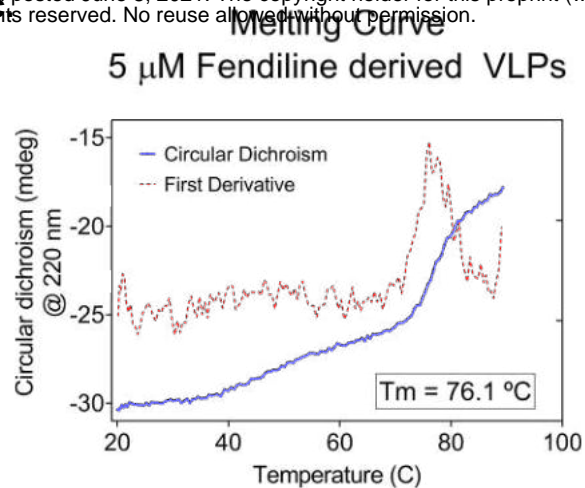

**b.**

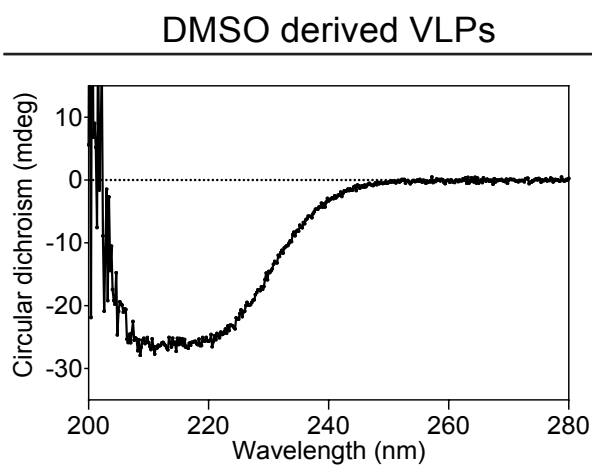

**d.**

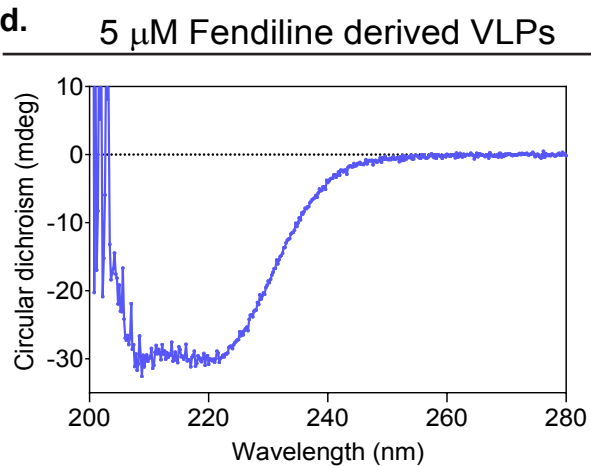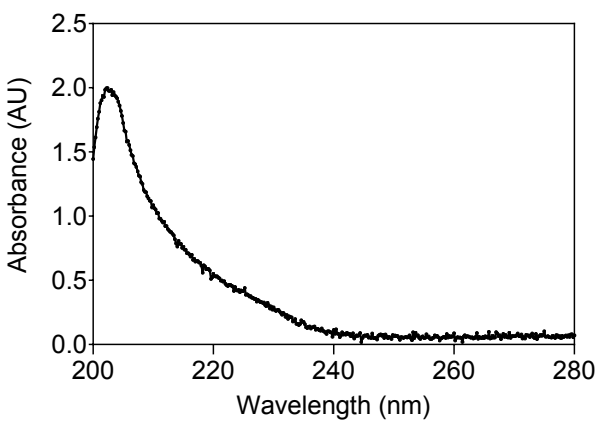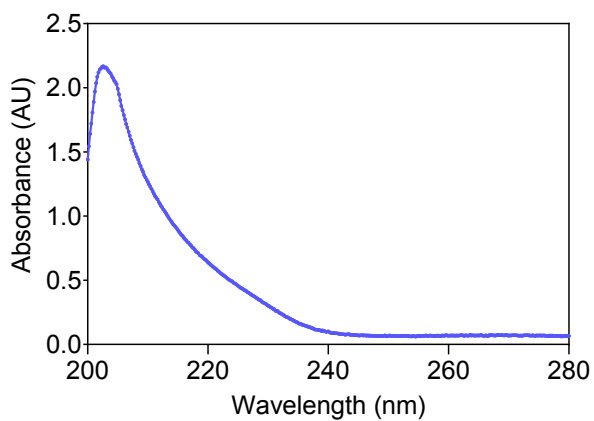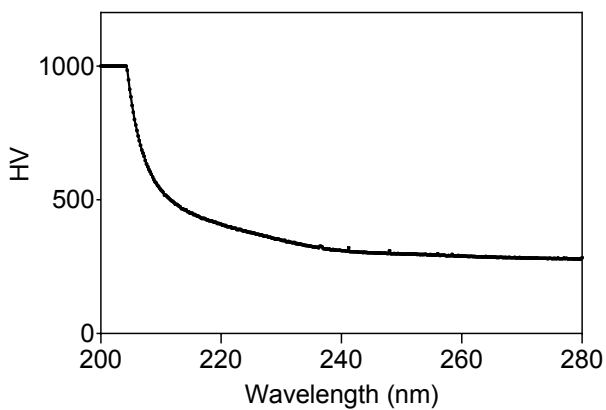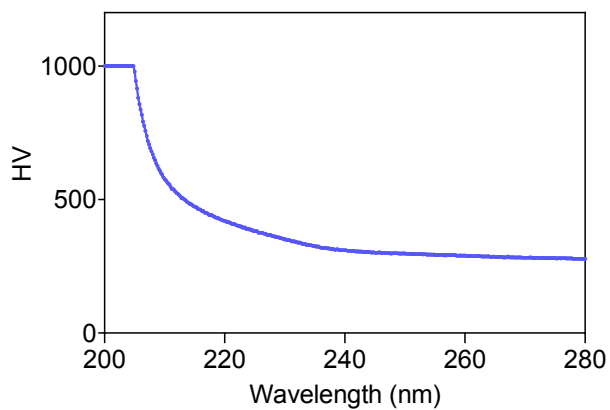

Budding

Entry

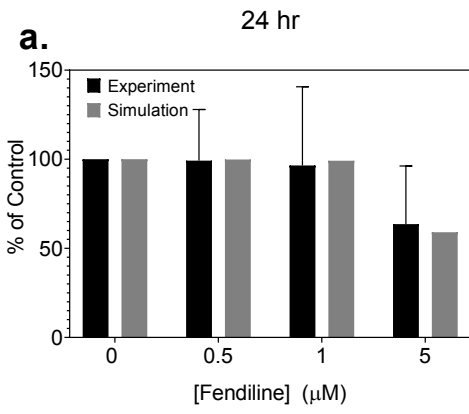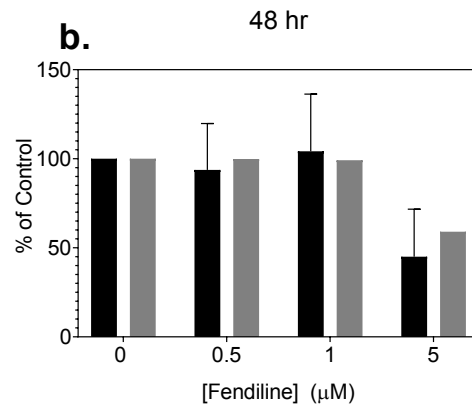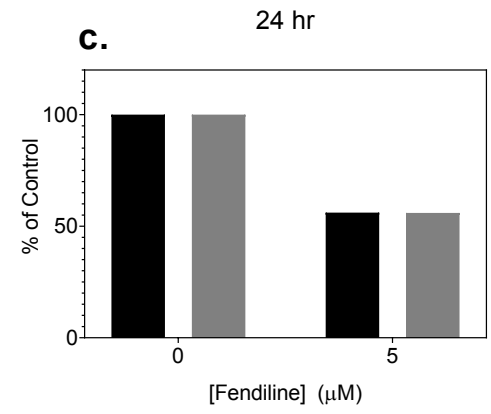

Pre-infection treatment

Daily treatment

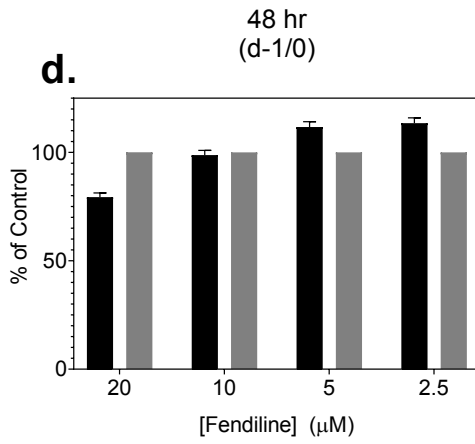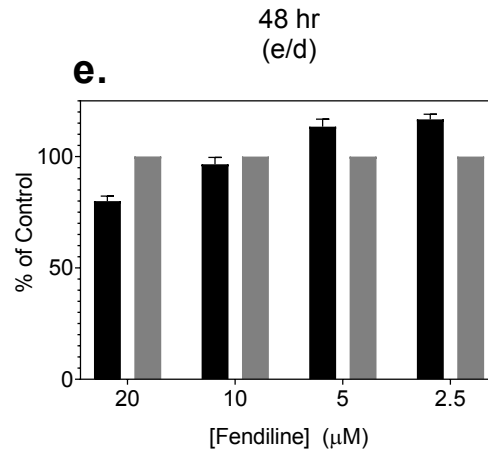

EV7
